# Supplementary material for: σ-Arsolido complexes
Source: Royal Society of Chemistry journal article supplement (doi:10.1039/d4dt01308e), 2024-01-01
Supplement: d4dt01308e1.pdf [file d4dt01308e1.pdf]

## Electronic Supporting Information for $\sigma$ -Arsolido complexes by Ryan M. Kirk and Anthony F. Hill

### Crystal and Refinement Parameters

| Parameter                                  | 2a                                                                                | 2b                                                                               | 2c                                                 | 2d                                                 | 2e                                                                | 3a                                                 | endo-6                                                          | ClAsC <sub>4</sub> Me <sub>2</sub> /Bu <sub>2</sub> |
|--------------------------------------------|-----------------------------------------------------------------------------------|----------------------------------------------------------------------------------|----------------------------------------------------|----------------------------------------------------|-------------------------------------------------------------------|----------------------------------------------------|-----------------------------------------------------------------|-----------------------------------------------------|
| Empirical Formula                          | C <sub>36</sub> H <sub>25</sub> AsMoO <sub>3</sub> ·C <sub>6</sub> H <sub>6</sub> | C <sub>36</sub> H <sub>25</sub> AsO <sub>3</sub> W·C <sub>6</sub> H <sub>6</sub> | C <sub>16</sub> H <sub>17</sub> AsMoO <sub>3</sub> | C <sub>16</sub> H <sub>17</sub> AsO <sub>3</sub> W | C <sub>17</sub> H <sub>21</sub> AsMoO <sub>3</sub> Si             | C <sub>35</sub> H <sub>25</sub> AsFeO <sub>2</sub> | C <sub>16</sub> H <sub>24</sub> As <sub>2</sub> Cl <sub>2</sub> | C <sub>14</sub> H <sub>24</sub> AsCl                |
| <i>M<sub>w</sub></i> /gmol <sup>-1</sup>   | 754.53                                                                            | 842.44                                                                           | 428.15                                             | 516.06                                             | 472.29                                                            | 608.32                                             | 437.09                                                          | 302.70                                              |
| Crystal system                             | Orthorhombic                                                                      | Orthorhombic                                                                     | Triclinic                                          | Monoclinic                                         | Orthorhombic                                                      | Monoclinic                                         | Monoclinic                                                      | Triclinic                                           |
| Space Group (No.)                          | <i>Pbca</i> (#16)                                                                 | <i>Pbca</i> (#16)                                                                | <i>P</i> -1 (#2)                                   | <i>P2</i> <sub>1</sub> / <i>c</i> (#14)            | <i>P2</i> <sub>1</sub> <i>2</i> <sub>1</sub> 2 <sub>1</sub> (#19) | <i>C2</i> / <i>c</i> (#15)                         | <i>P2</i> <sub>1</sub> / <i>n</i> (#14)                         | <i>P</i> -1 (#2)                                    |
| <i>a</i> /Å                                | 18.87950(10)                                                                      | 18.88750(10)                                                                     | 7.6134(2)                                          | 7.66960(10)                                        | 6.65790(10)                                                       | 20.34180(10)                                       | 14.355(4)                                                       | 9.0412(3)                                           |
| <i>b</i> /Å                                | 15.39100(10)                                                                      | 15.38100(10)                                                                     | 7.7893(2)                                          | 28.8296(3)                                         | 13.0043(2)                                                        | 15.50870(10)                                       | 9.7741(6)                                                       | 11.8621(4)                                          |
| <i>c</i> /Å                                | 23.5717(2)                                                                        | 23.5386(2)                                                                       | 14.8554(6)                                         | 7.74520(10)                                        | 22.3782(5)                                                        | 17.76510(10)                                       | 20.102(5)                                                       | 14.5361(5)                                          |
| $\alpha$ /deg                              | 90                                                                                | 90                                                                               | 78.829(3)                                          | 90                                                 | 90                                                                | 90                                                 | 90                                                              | 80.871(3)                                           |
| $\beta$ /deg                               | 90                                                                                | 90                                                                               | 88.971(3)                                          | 106.6740(10)                                       | 90                                                                | 91.4300(10)                                        | 141.48(5)                                                       | 81.879(3)                                           |
| $\gamma$ /deg                              | 90                                                                                | 90                                                                               | 72.297(2)                                          | 90                                                 | 90                                                                | 90                                                 | 90                                                              | 77.842(3)                                           |
| <i>V</i> /Å <sup>3</sup>                   | 6849.33(8)                                                                        | 6838.17(8)                                                                       | 822.56(5)                                          | 1640.54(4)                                         | 1937.53(6)                                                        | 5602.70(6)                                         | 1756.7(14)                                                      | 1495.27(9)                                          |
| <i>Z</i>                                   | 8                                                                                 | 8                                                                                | 2                                                  | 4                                                  | 4                                                                 | 8                                                  | 4                                                               | 4                                                   |
| Crystal Dimensions/mm                      | 0.197/0.093/0.062                                                                 | 0.283/0.119/0.043                                                                | 0.193/0.165/0.095                                  | 0.179/0.126/0.056                                  | 0.414/0.077/0.066                                                 | 0.222/0.159/0.105                                  | 0.37/0.261/0.222                                                | 0.321/                                              |
| Crystal Description                        | Yellow prism                                                                      | Yellow prism                                                                     | Orange prism                                       | Orange plate                                       | Orange needle                                                     | Orange prism                                       | Colourless prism                                                | Yellow needle                                       |
| <i>D<sub>calc</sub></i> /Mgm <sup>-3</sup> | 1.463                                                                             | 1.637                                                                            | 1.729                                              | 2.089                                              | 1.619                                                             | 1.442                                              | 1.653                                                           | 1.345                                               |
| $\mu$ /mm <sup>-1</sup>                    | Cu: 4.508                                                                         | Cu: 7.639                                                                        | Cu: 8.814                                          | Cu: 15.349                                         | Cu: 8.116                                                         | Cu: 5.863                                          | Mo: 4.098                                                       | Cu: 4.495                                           |
| Total reflections                          | 45669                                                                             | 27682                                                                            | 9139                                               | 28908                                              | 7373                                                              | 34915                                              | 12271                                                           | 15607                                               |
| Unique reflections                         | 6909                                                                              | 6869                                                                             | 9139                                               | 3293                                               | 3665                                                              | 5650                                               | 5547                                                            | 5973                                                |
| <i>R<sub>int</sub></i>                     | 0.0241                                                                            | 0.0247                                                                           | 0.0441                                             | 0.0231                                             | 0.0269                                                            | 0.0178                                             | 0.0320                                                          | 0.0312                                              |
| GOF on <i>F</i> <sup>2</sup>               | 1.032                                                                             | 1.037                                                                            | 1.114                                              | 1.224                                              | 1.036                                                             | 1.033                                              | 1.036                                                           | 1.028                                               |
| <i>R</i> <sub>1</sub>                      | 0.0272                                                                            | 0.0247                                                                           | 0.0391                                             | 0.0203                                             | 0.0264                                                            | 0.0195                                             | 0.0377                                                          | 0.0285                                              |
| $\omega R$ <sub>2</sub>                    | 0.0746                                                                            | 0.0636                                                                           | 0.1121                                             | 0.0488                                             | 0.0617                                                            | 0.0525                                             | 0.0811                                                          | 0.0722                                              |
| Largest diff. peak /eÅ <sup>-1</sup>       | -0.65                                                                             | -0.68                                                                            | -0.95                                              | -0.77                                              | -0.45                                                             | -0.21                                              | -0.70                                                           | 0.50                                                |
| Largest diff. hole/eÅ <sup>-1</sup>        | 0.60                                                                              | 0.69                                                                             | 0.59                                               | 0.81                                               | 0.40                                                              | 0.26                                               | 0.89                                                            | 0.36                                                |
| Refined parameters                         | 424                                                                               | 424                                                                              | 195                                                | 194                                                | 214                                                               | 418                                                | 189                                                             | 305                                                 |
| CCDC                                       | 2145356                                                                           | 2145353                                                                          | 2145355                                            | 2145363                                            | 2145352                                                           | 2145354                                            | 2145384                                                         | 2359530                                             |

Goodness-of-fit  $S = [\sum \omega(F_o^2 - F_c^2)^2 / (n-p)]^{1/2}$ , where *n* is the number of reflections and *p* the number of parameters.  $R_1 = \sum \| |F_o| - |F_c| \| / \sum |F_o|$ ,  $\omega R_2 = [\sum \omega(F_o^2 - F_c^2)^2 / \sum \omega(F_o^2)^2]^{1/2}$

## Selected Spectra

1 Cl-AsC<sub>4</sub>Ph<sub>4</sub>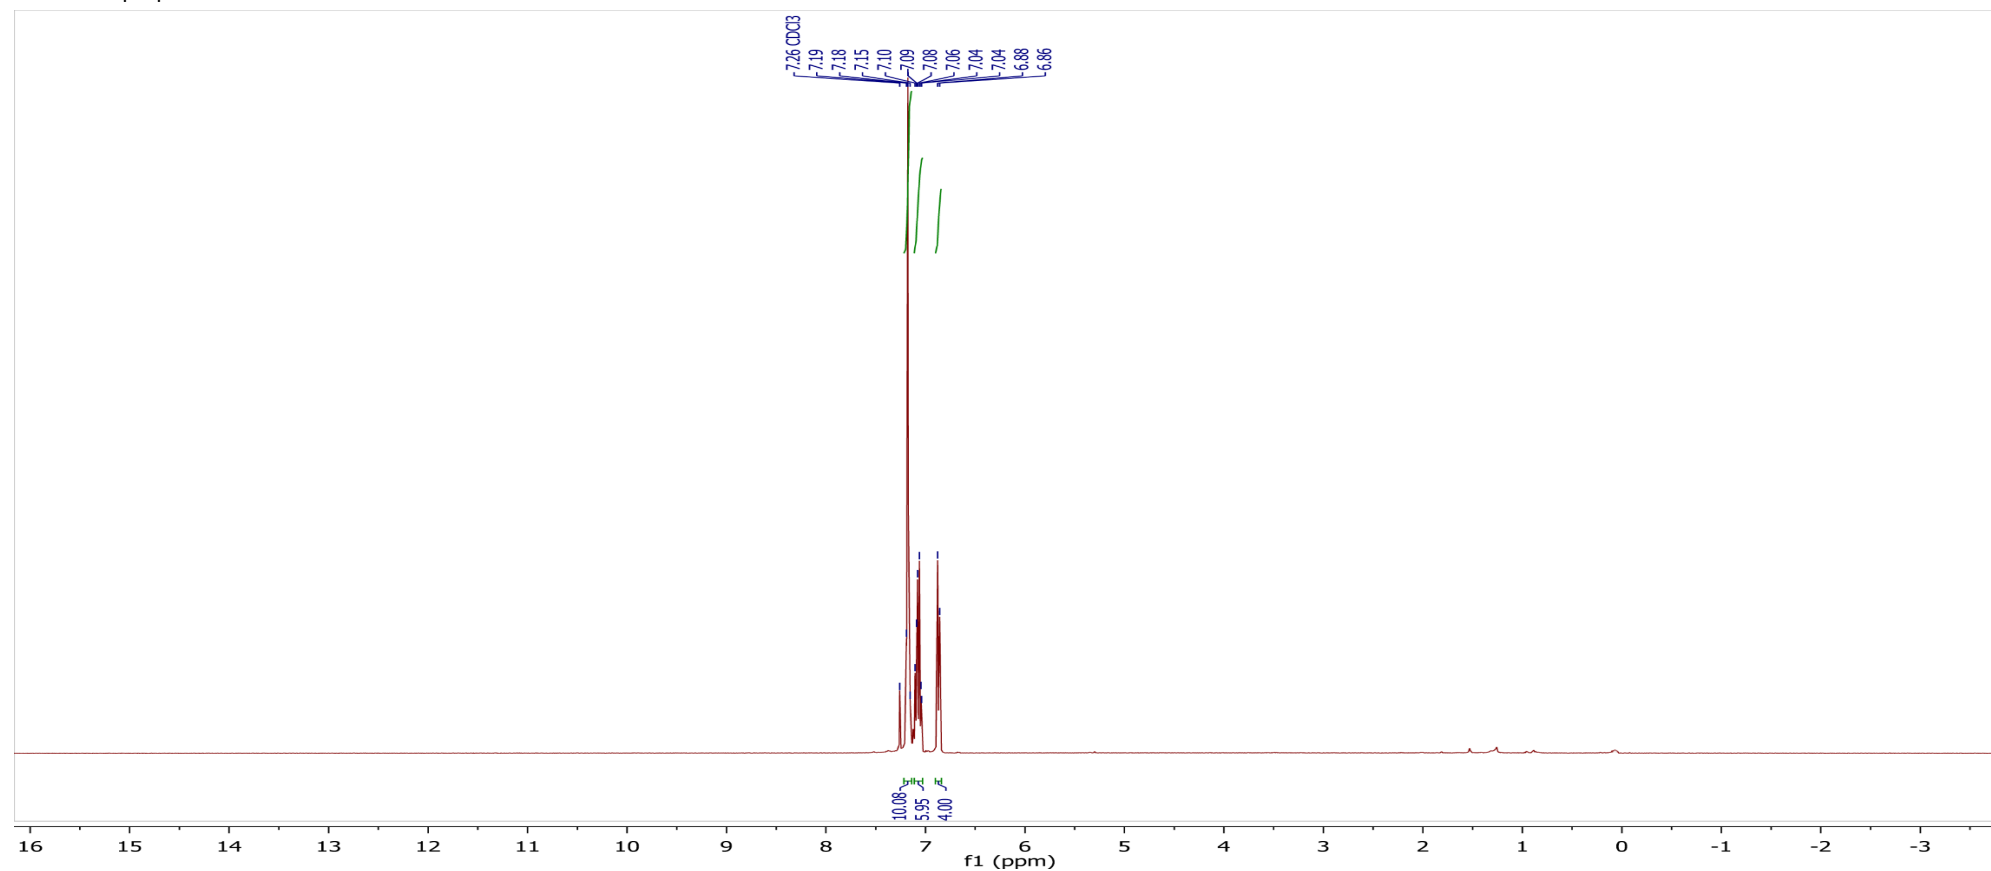

Figure S1. <sup>1</sup>H NMR Spectrum (CDCl<sub>3</sub>, 295 K, 400 MHz, δ) of ClAsC<sub>4</sub>Ph<sub>4</sub>

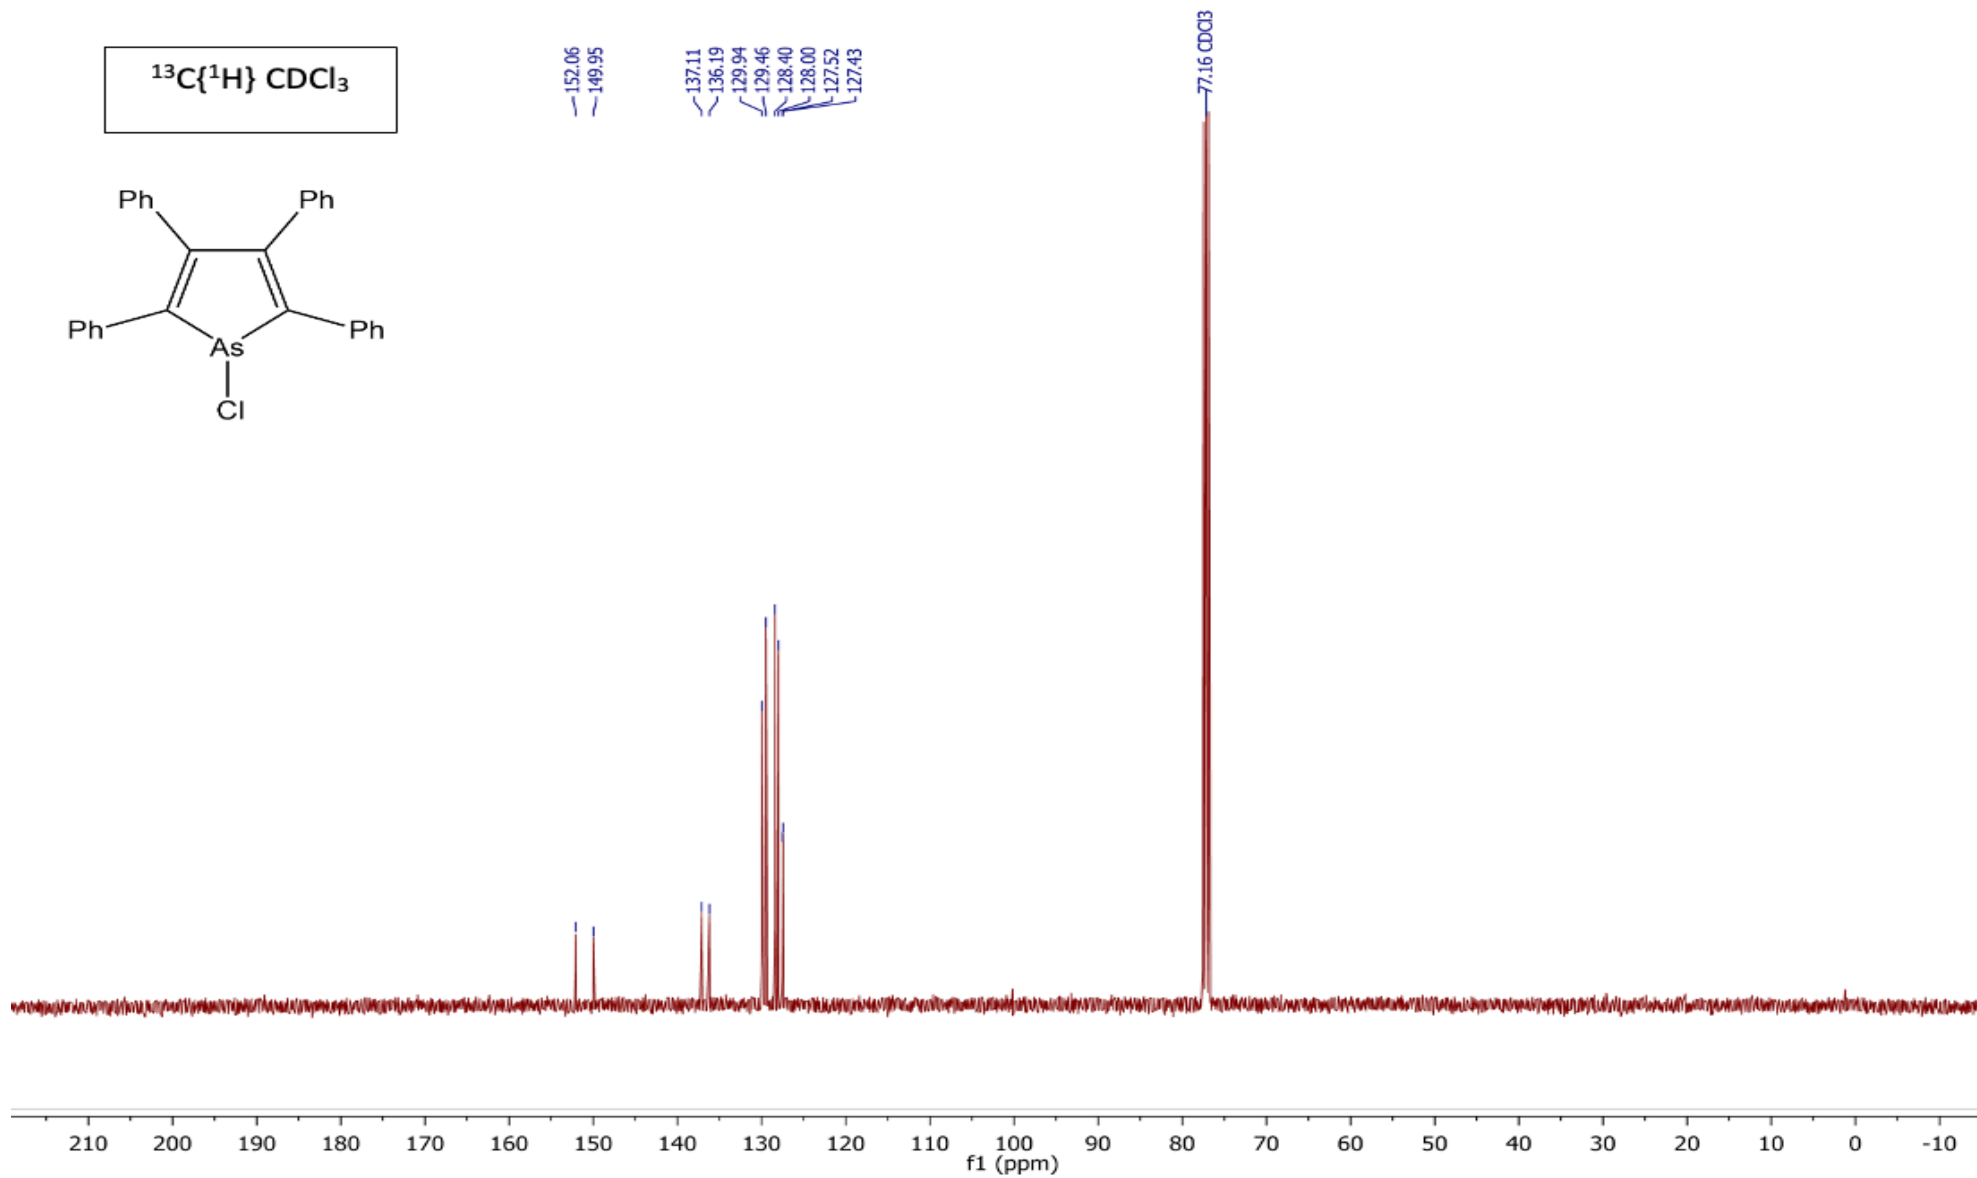

Figure S2.  $^{13}\text{C}\{^1\text{H}\}$  NMR Spectrum ( $\text{CDCl}_3$ , 295 K, 101 MHz,  $\delta$ ) of  $\text{ClAsC}_4\text{Ph}_4$

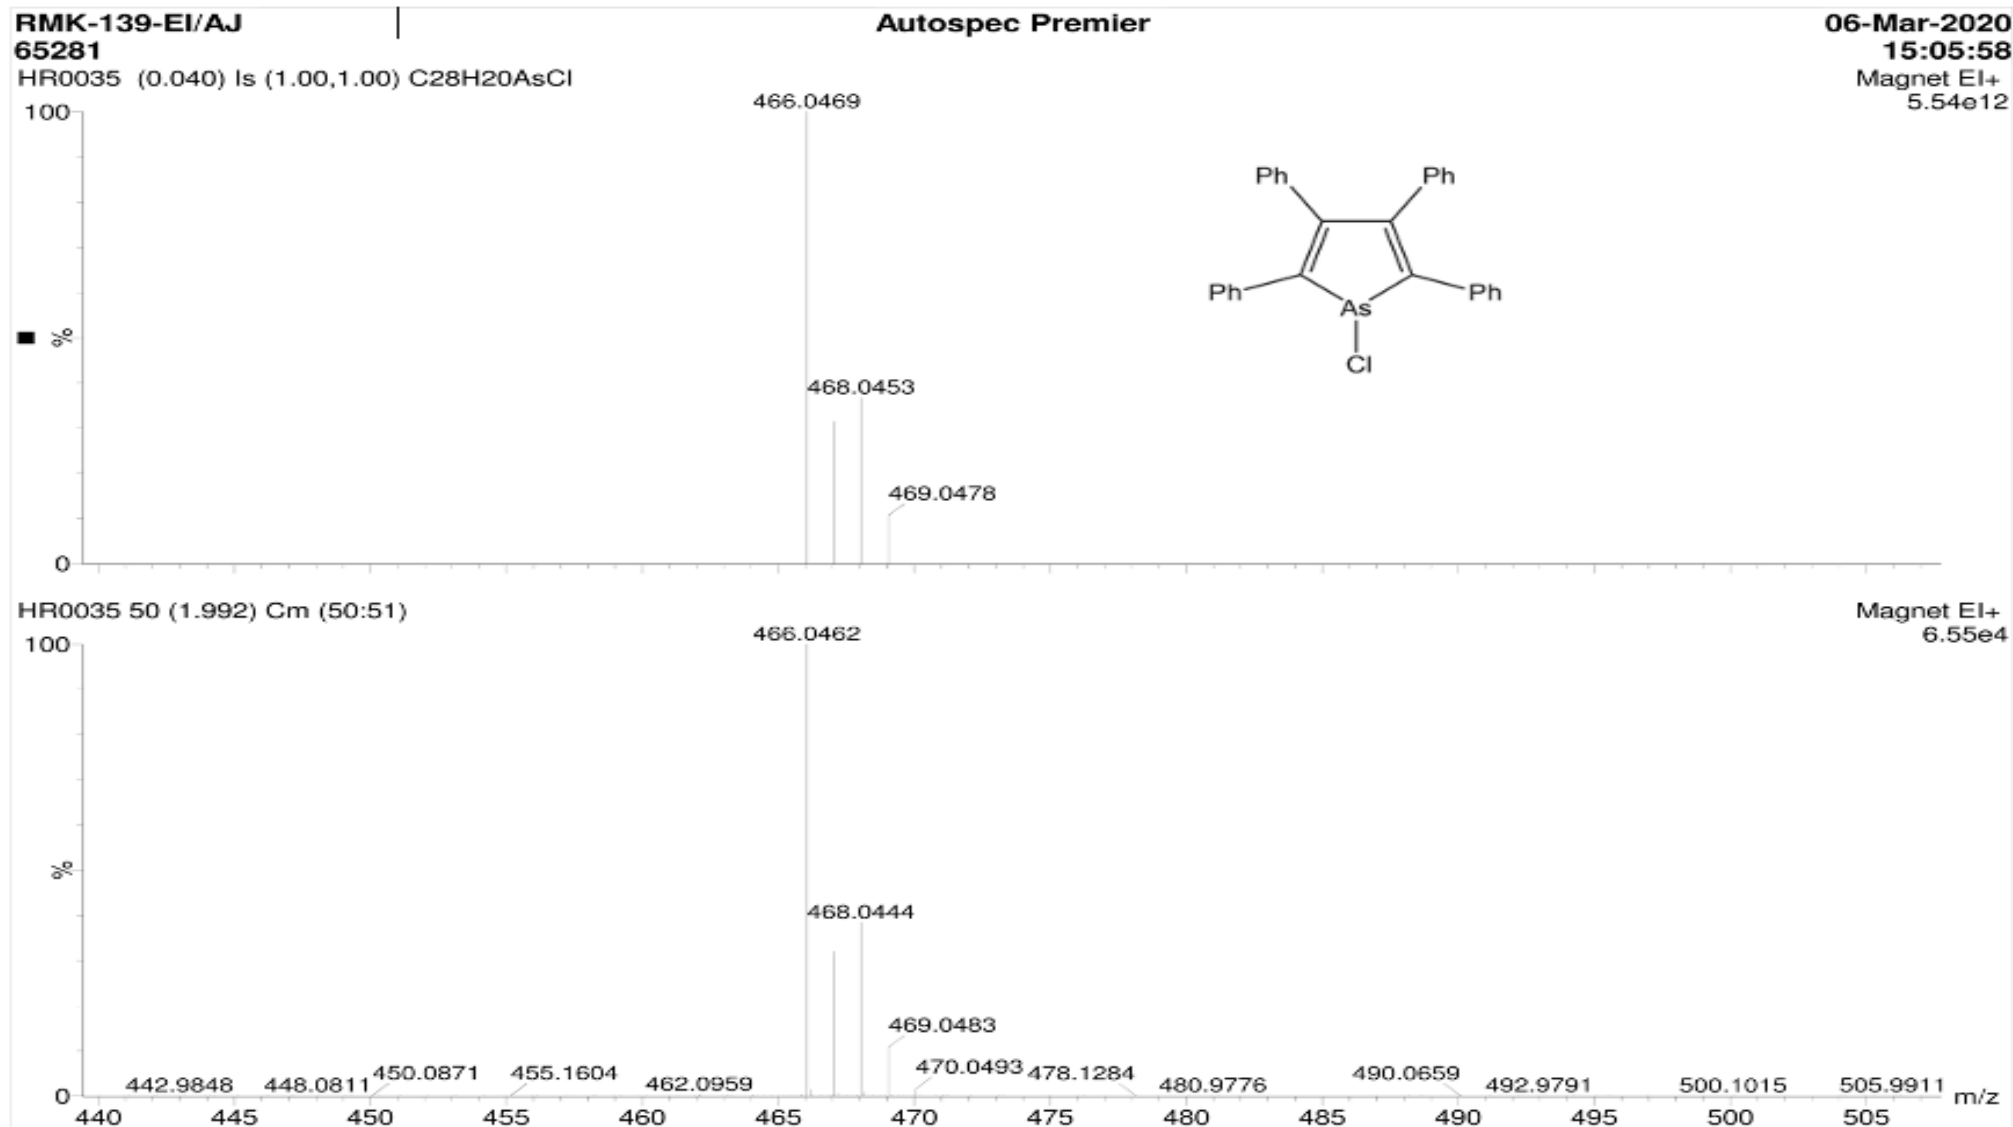

Figure S3. High Resolution Mass Spectrum (ESI-MS, MeCN) of ClAsC<sub>4</sub>Ph<sub>4</sub>

2  $[\text{Mo}(\text{AsC}_4\text{Ph}_4)(\text{CO})_3(\eta^5\text{-C}_5\text{H}_5)]$  (**2a**)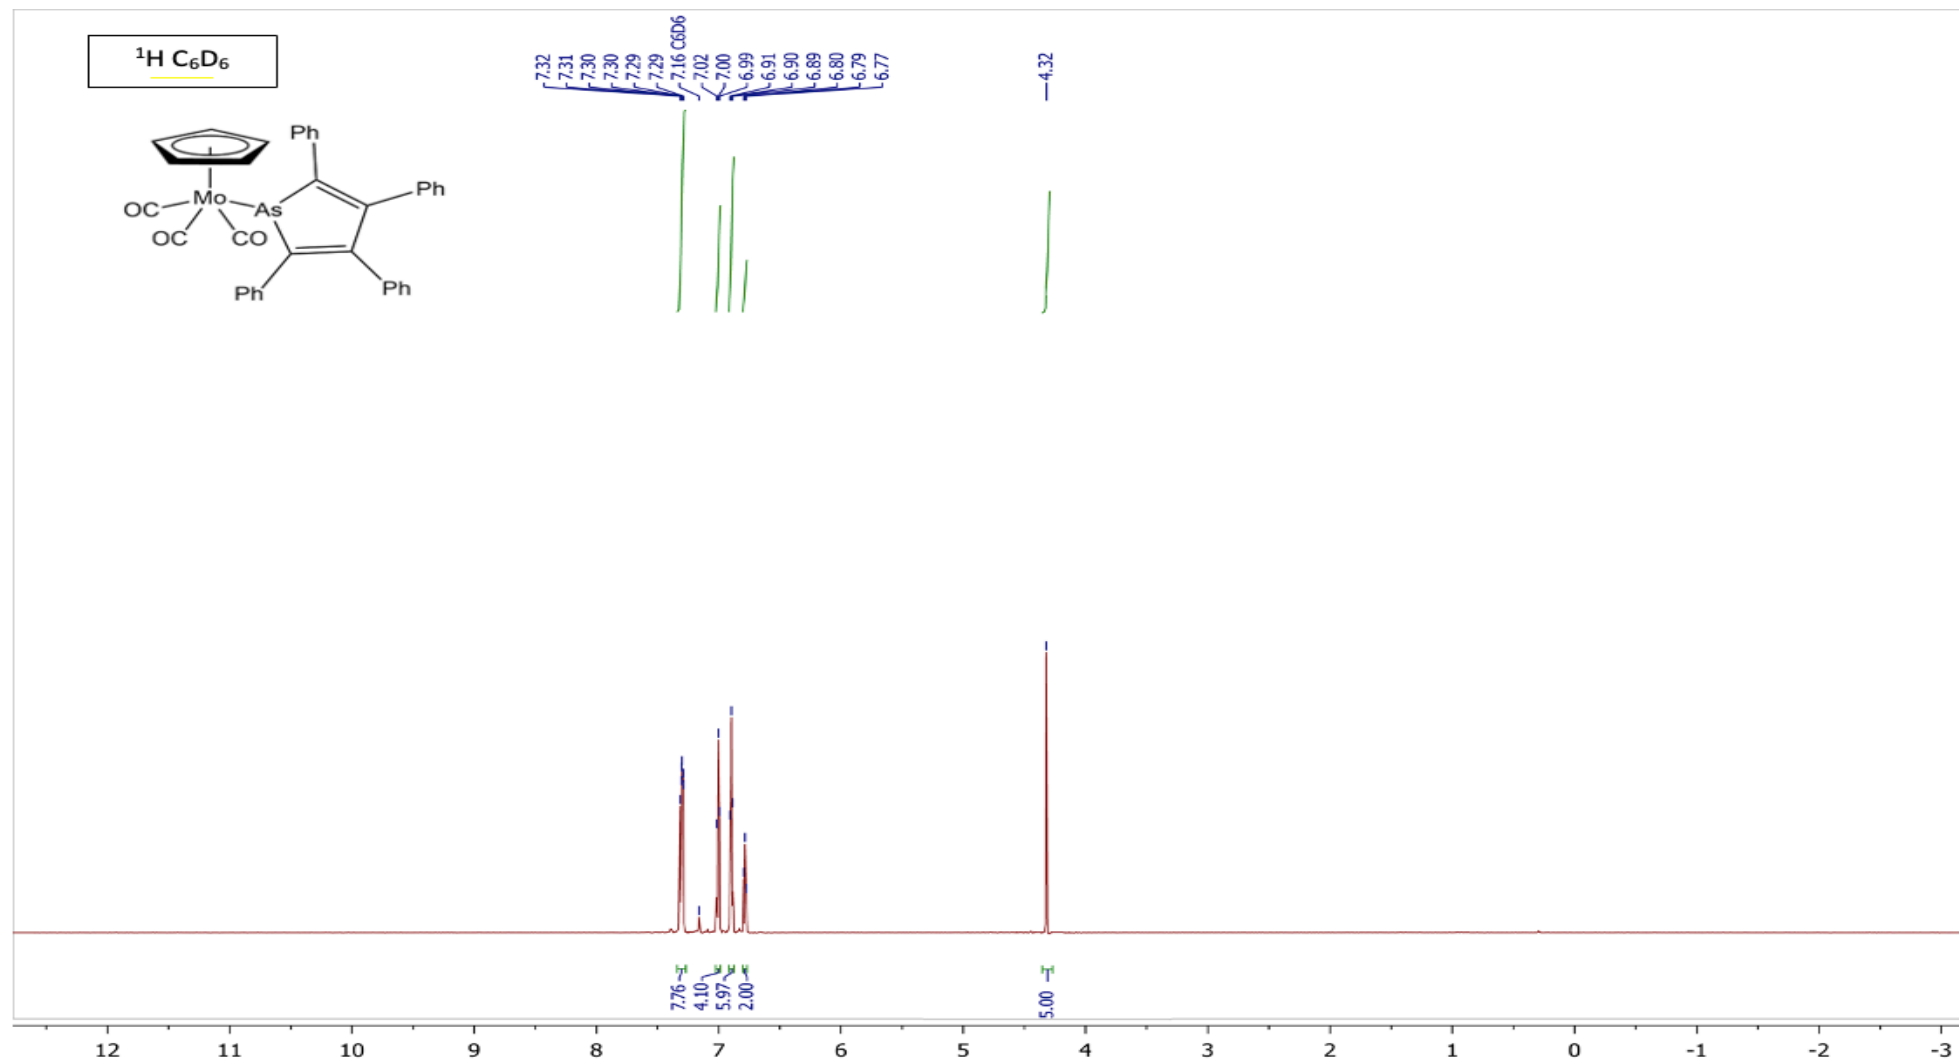**Figure S4.**  $^1\text{H}$  NMR Spectrum ( $\text{CDCl}_3$ , 295 K, 400 MHz,  $\delta$ ) of  $[\text{Mo}(\text{AsC}_4\text{Ph}_4)(\text{CO})_3(\eta^5\text{-C}_5\text{H}_5)]$  (**2a**)

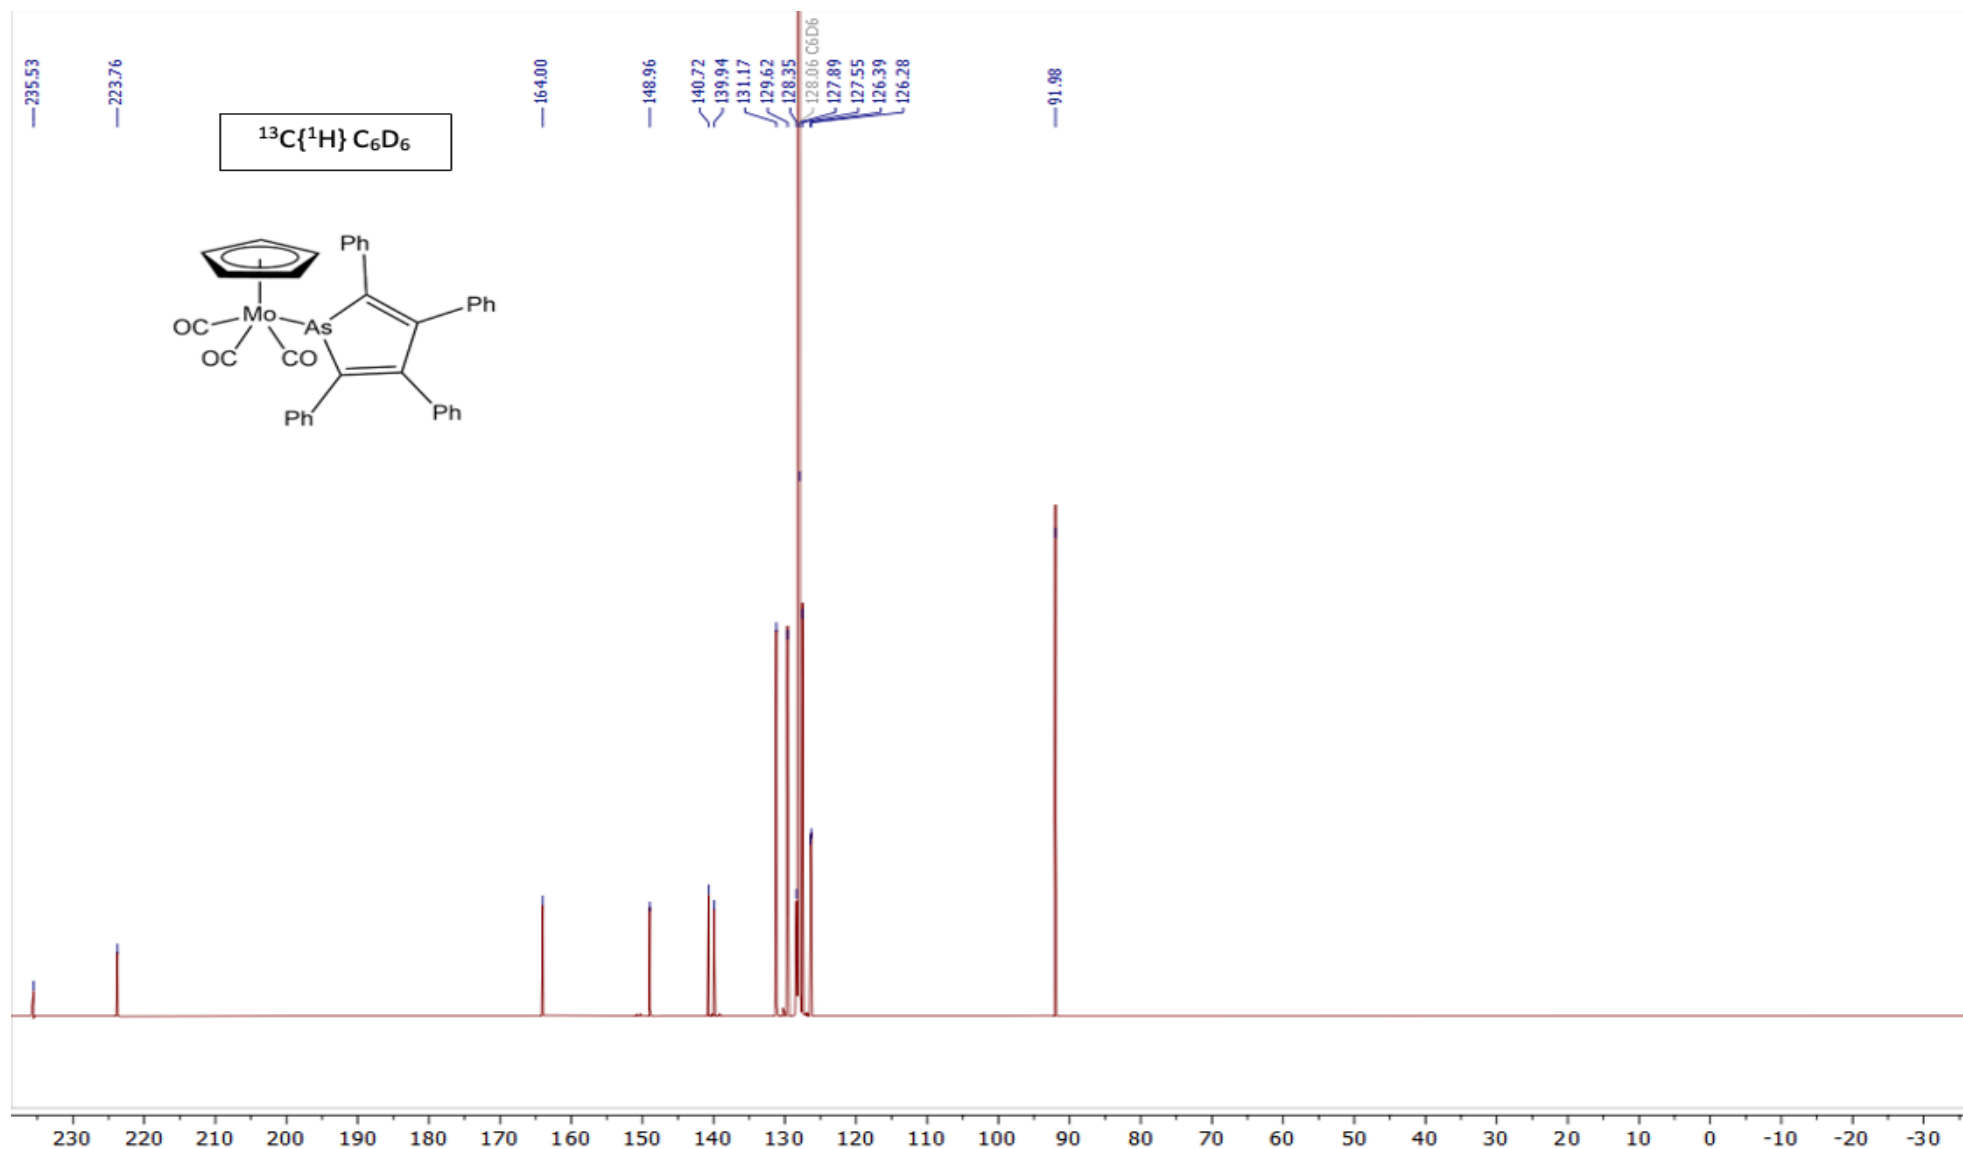

Figure S5.  $^{13}\text{C}\{^1\text{H}\}$  NMR Spectrum ( $\text{CDCl}_3$ , 295 K, 201 MHz,  $\delta$ ) of  $[\text{Mo}(\text{AsC}_4\text{Ph}_4)(\text{CO})_3(\eta^5\text{-C}_5\text{H}_5)]$  (**2a**)

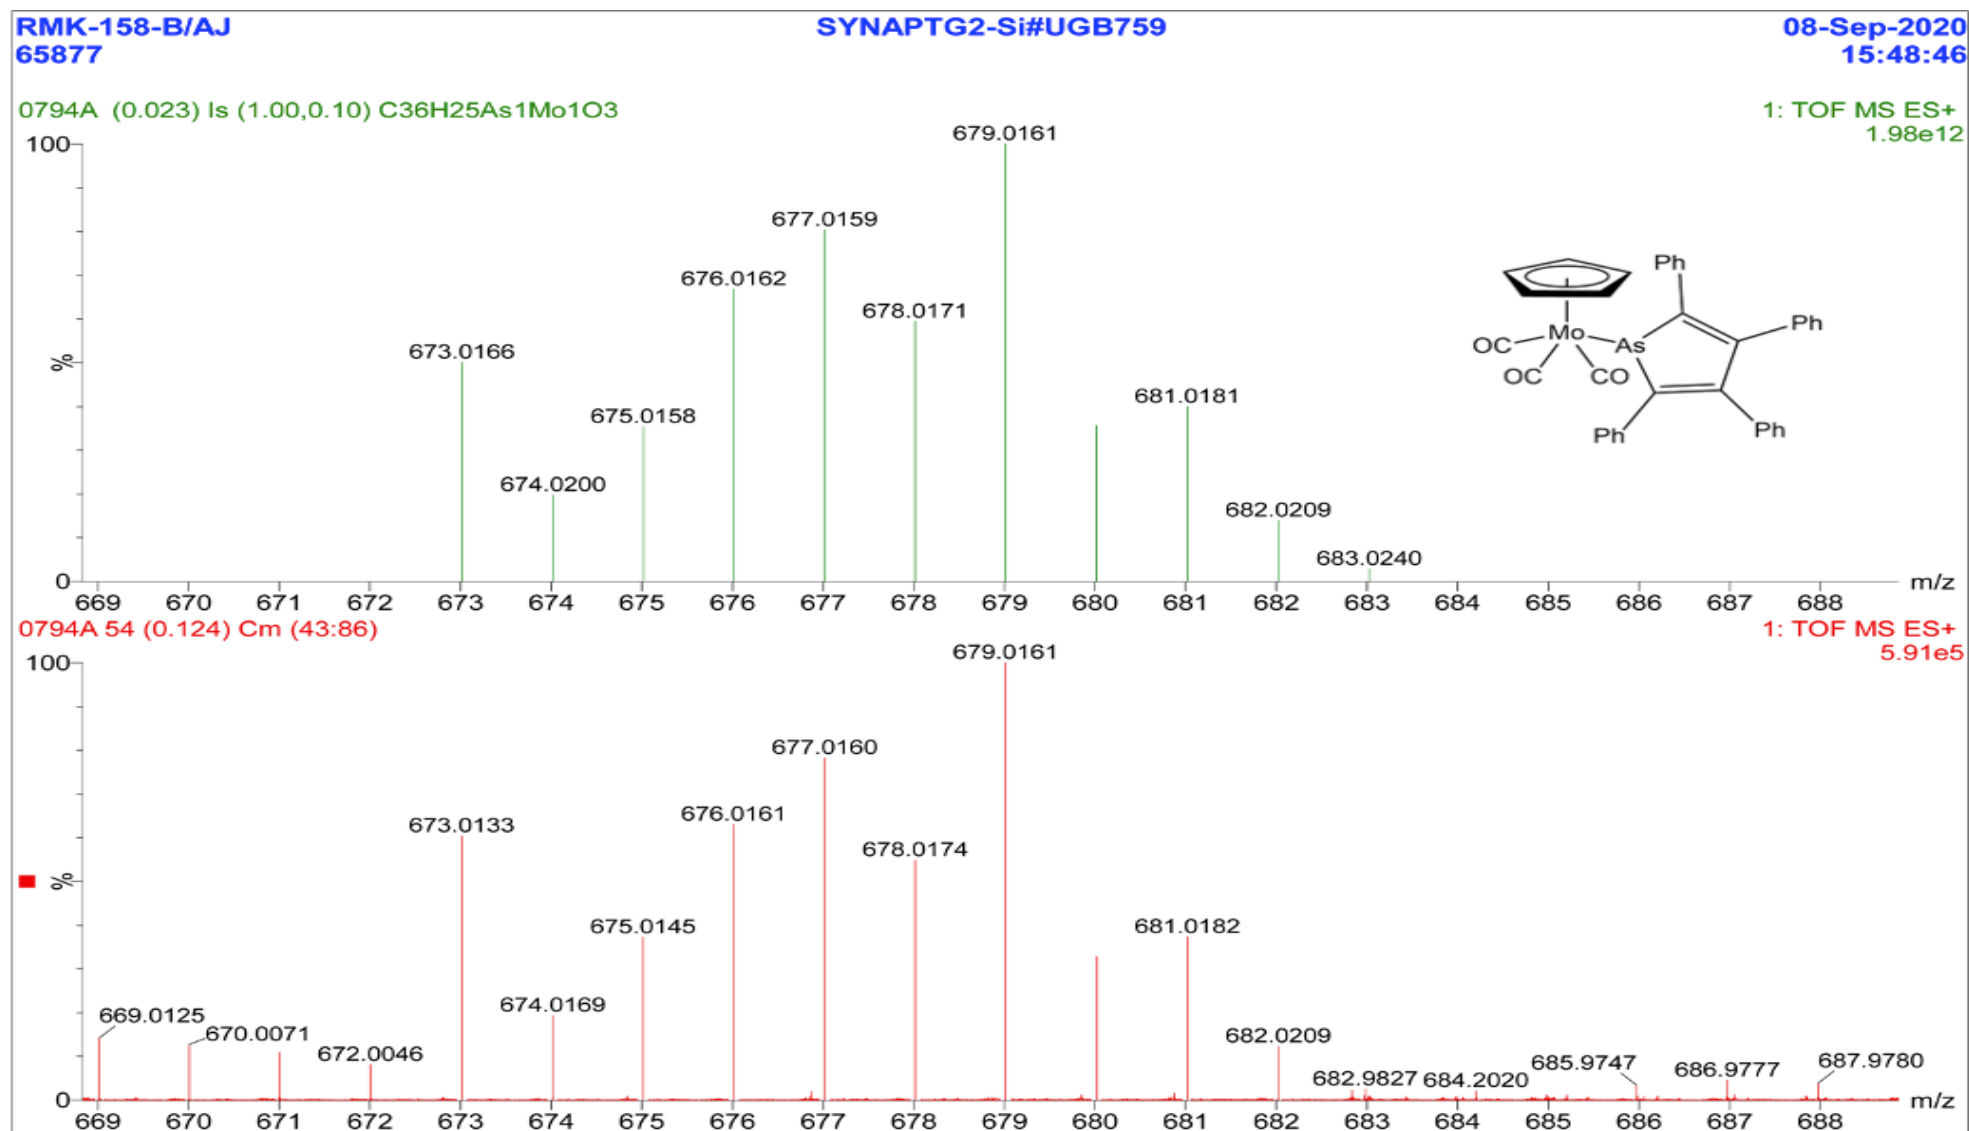

Figure S6. High Resolution Mass Spectrum (ESI-MS, MeCN) of [Mo(AsC<sub>4</sub>Ph<sub>4</sub>)(CO)<sub>3</sub>(η<sup>5</sup>-C<sub>5</sub>H<sub>5</sub>)] (2a)

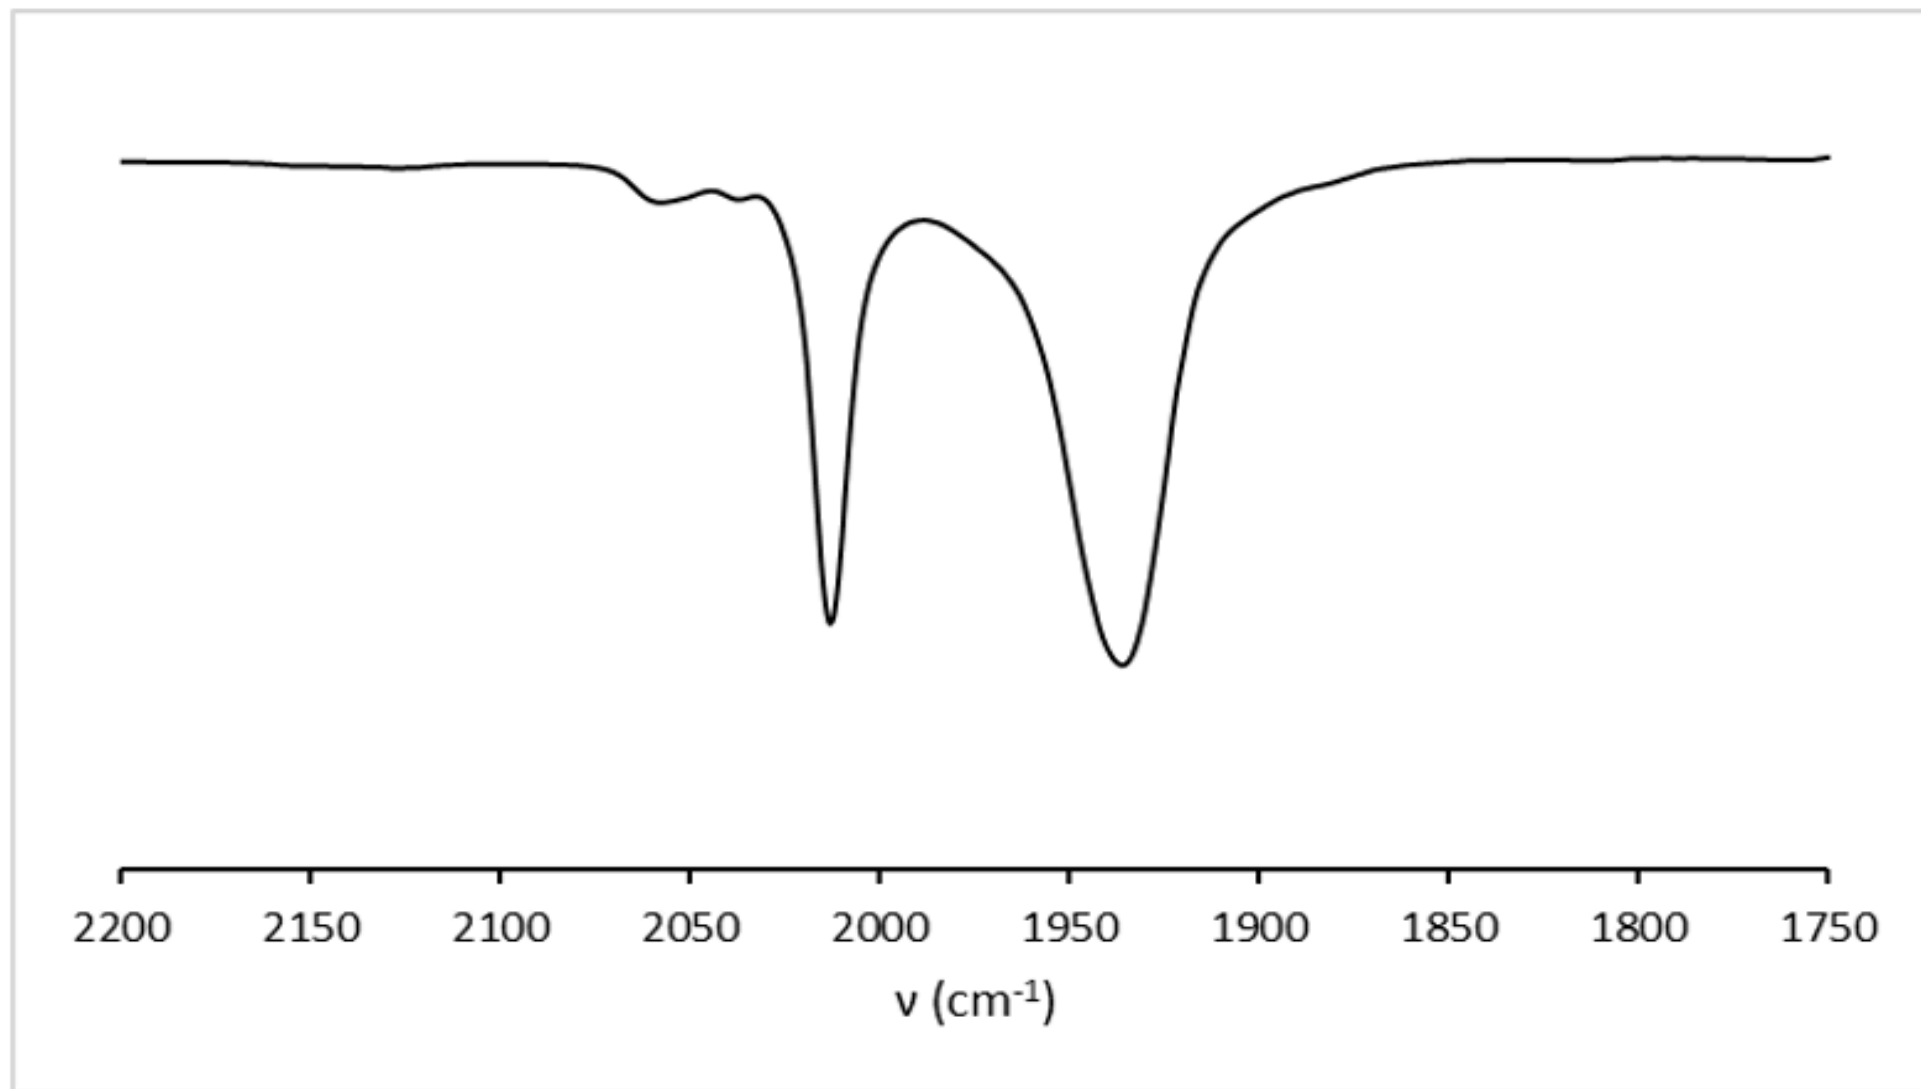

Figure S7. IR Spectrum (CH<sub>2</sub>Cl<sub>2</sub>, 295 K,  $\nu$  cm<sup>-1</sup>) of [Mo(AsC<sub>4</sub>Ph<sub>4</sub>)(CO)<sub>3</sub>(η<sup>5</sup>-C<sub>5</sub>H<sub>5</sub>)] (2a)



3  $[\text{W}(\text{AsC}_4\text{Ph}_4)(\text{CO})_3(\eta^5\text{-C}_5\text{H}_5)]$  (**2b**)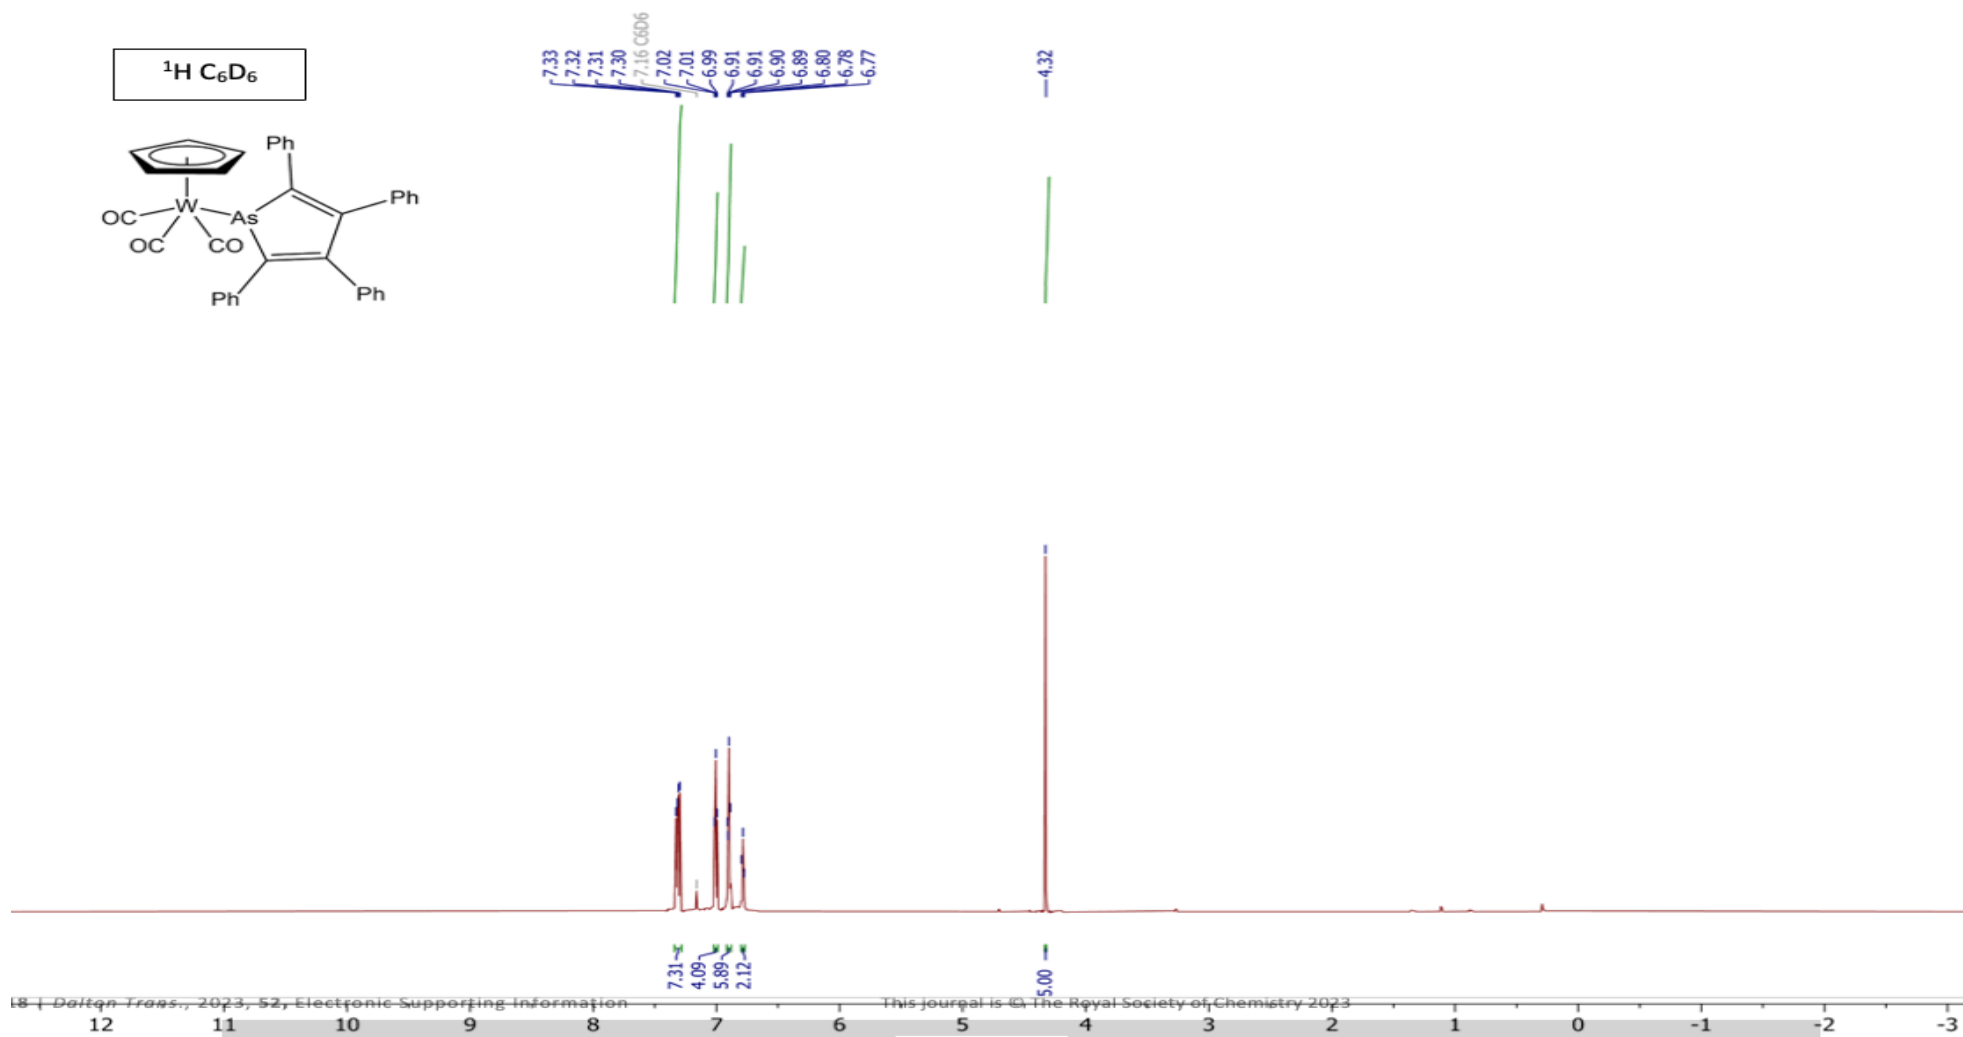**Figure S8.**  $^1\text{H}$  NMR Spectrum ( $\text{CDCl}_3$ , 295 K, 400 MHz,  $\delta$ ) of  $[\text{W}(\text{AsC}_4\text{Ph}_4)(\text{CO})_3(\eta^5\text{-C}_5\text{H}_5)]$  (**2b**)

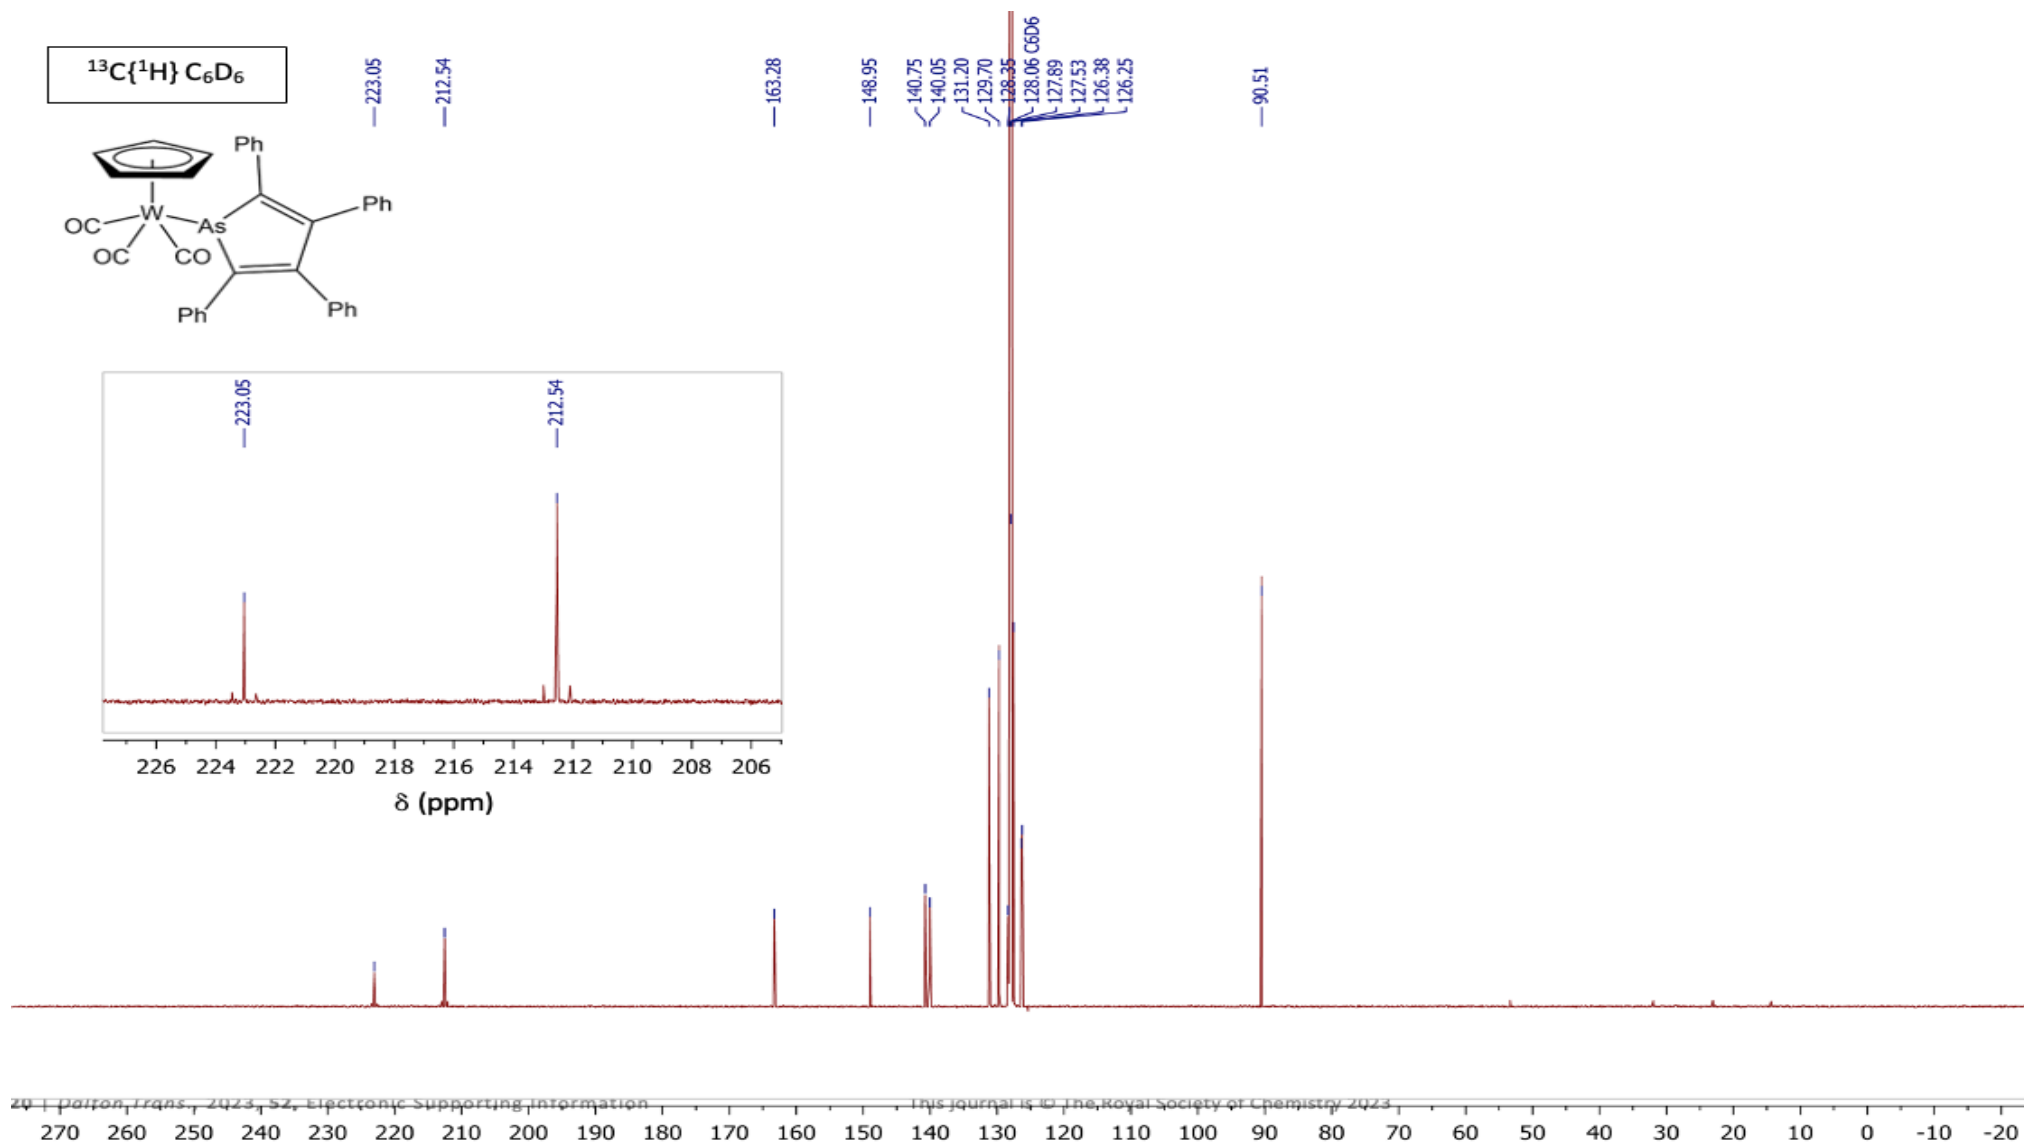

Figure S9.  $^{13}\text{C}\{^1\text{H}\}$  NMR Spectrum ( $\text{CDCl}_3$ , 295 K, 201 MHz,  $\delta$ ) of  $[\text{W}(\text{AsC}_4\text{Ph}_4)(\text{CO})_3(\eta^5\text{-C}_5\text{H}_5)]$  (**2b**)

RMK-187/AJ  
66955

SYNAPT G2-Si#NotSet

17-Feb-2022  
13:54:412193 (0.023) Is (1.00,0.10) C<sub>36</sub>H<sub>25</sub>As<sub>1</sub>O<sub>4</sub>W<sub>1</sub>1: TOF MS ES+  
2.58e12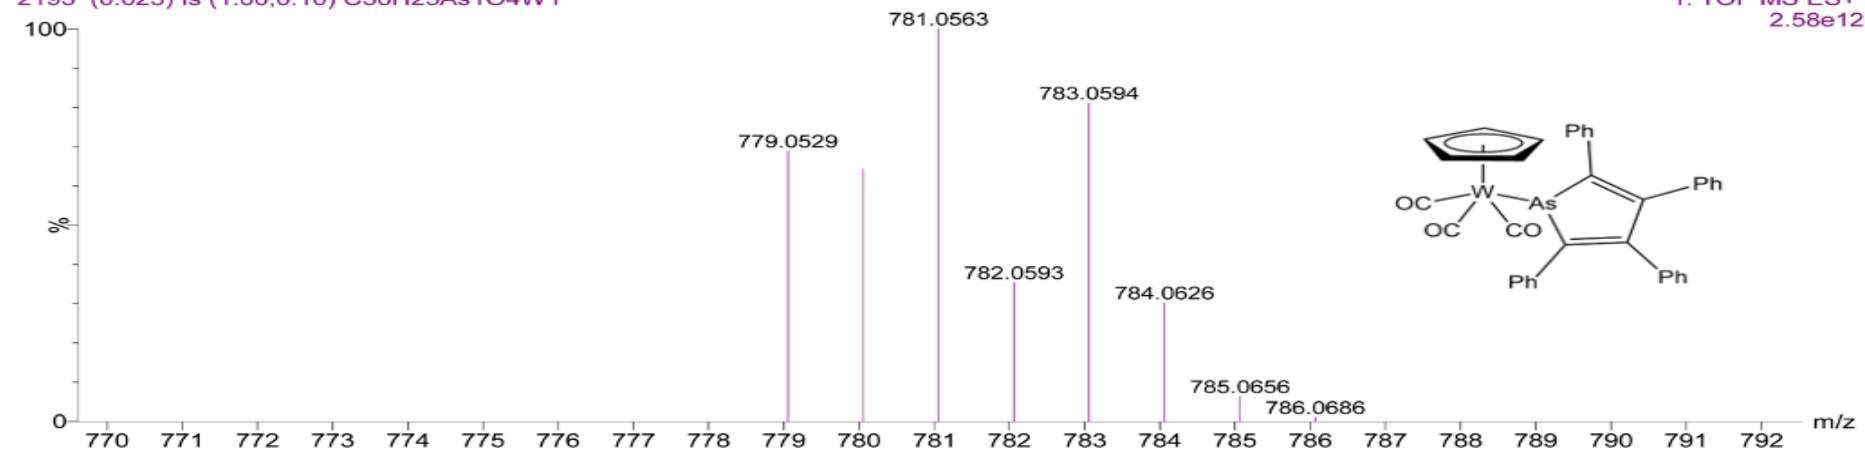

2193 144 (0.300) Cm (133:159)

1: TOF MS ES+  
7.38e6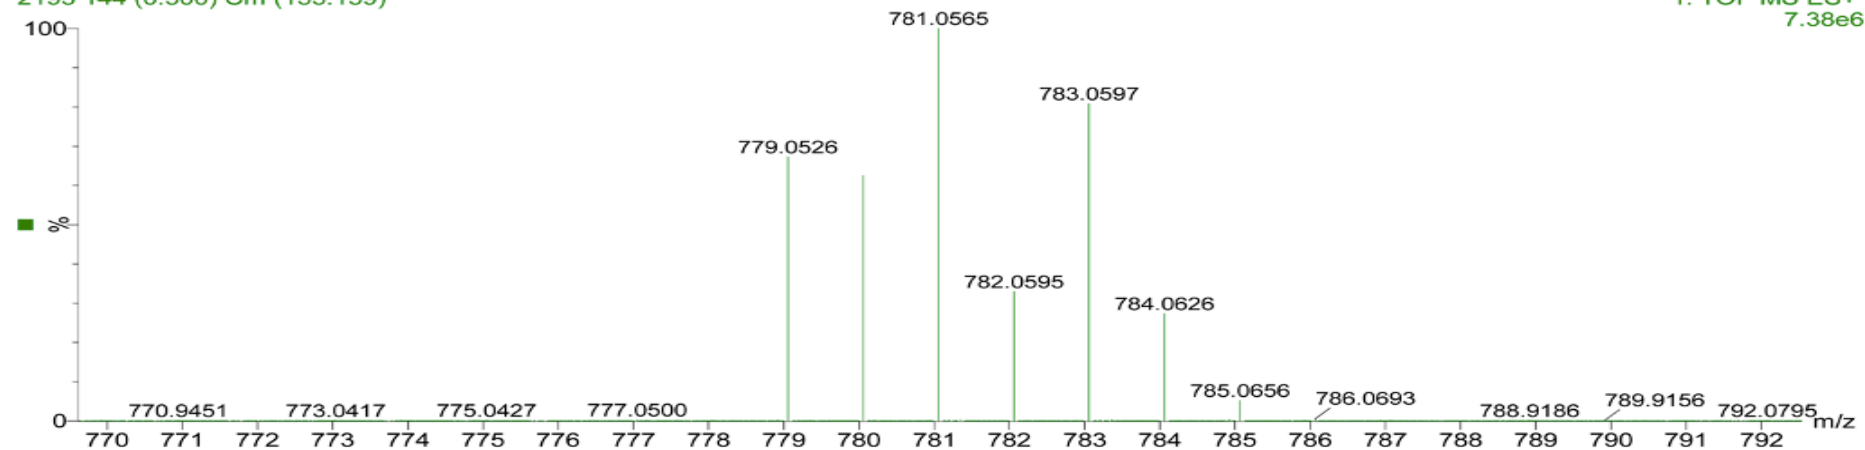Figure S10. High Resolution Mass Spectrum (ESI-MS, MeCN) of [W(AsC<sub>4</sub>Ph<sub>4</sub>)(CO)<sub>3</sub>(η<sup>5</sup>-C<sub>5</sub>H<sub>5</sub>)] (**2b**)

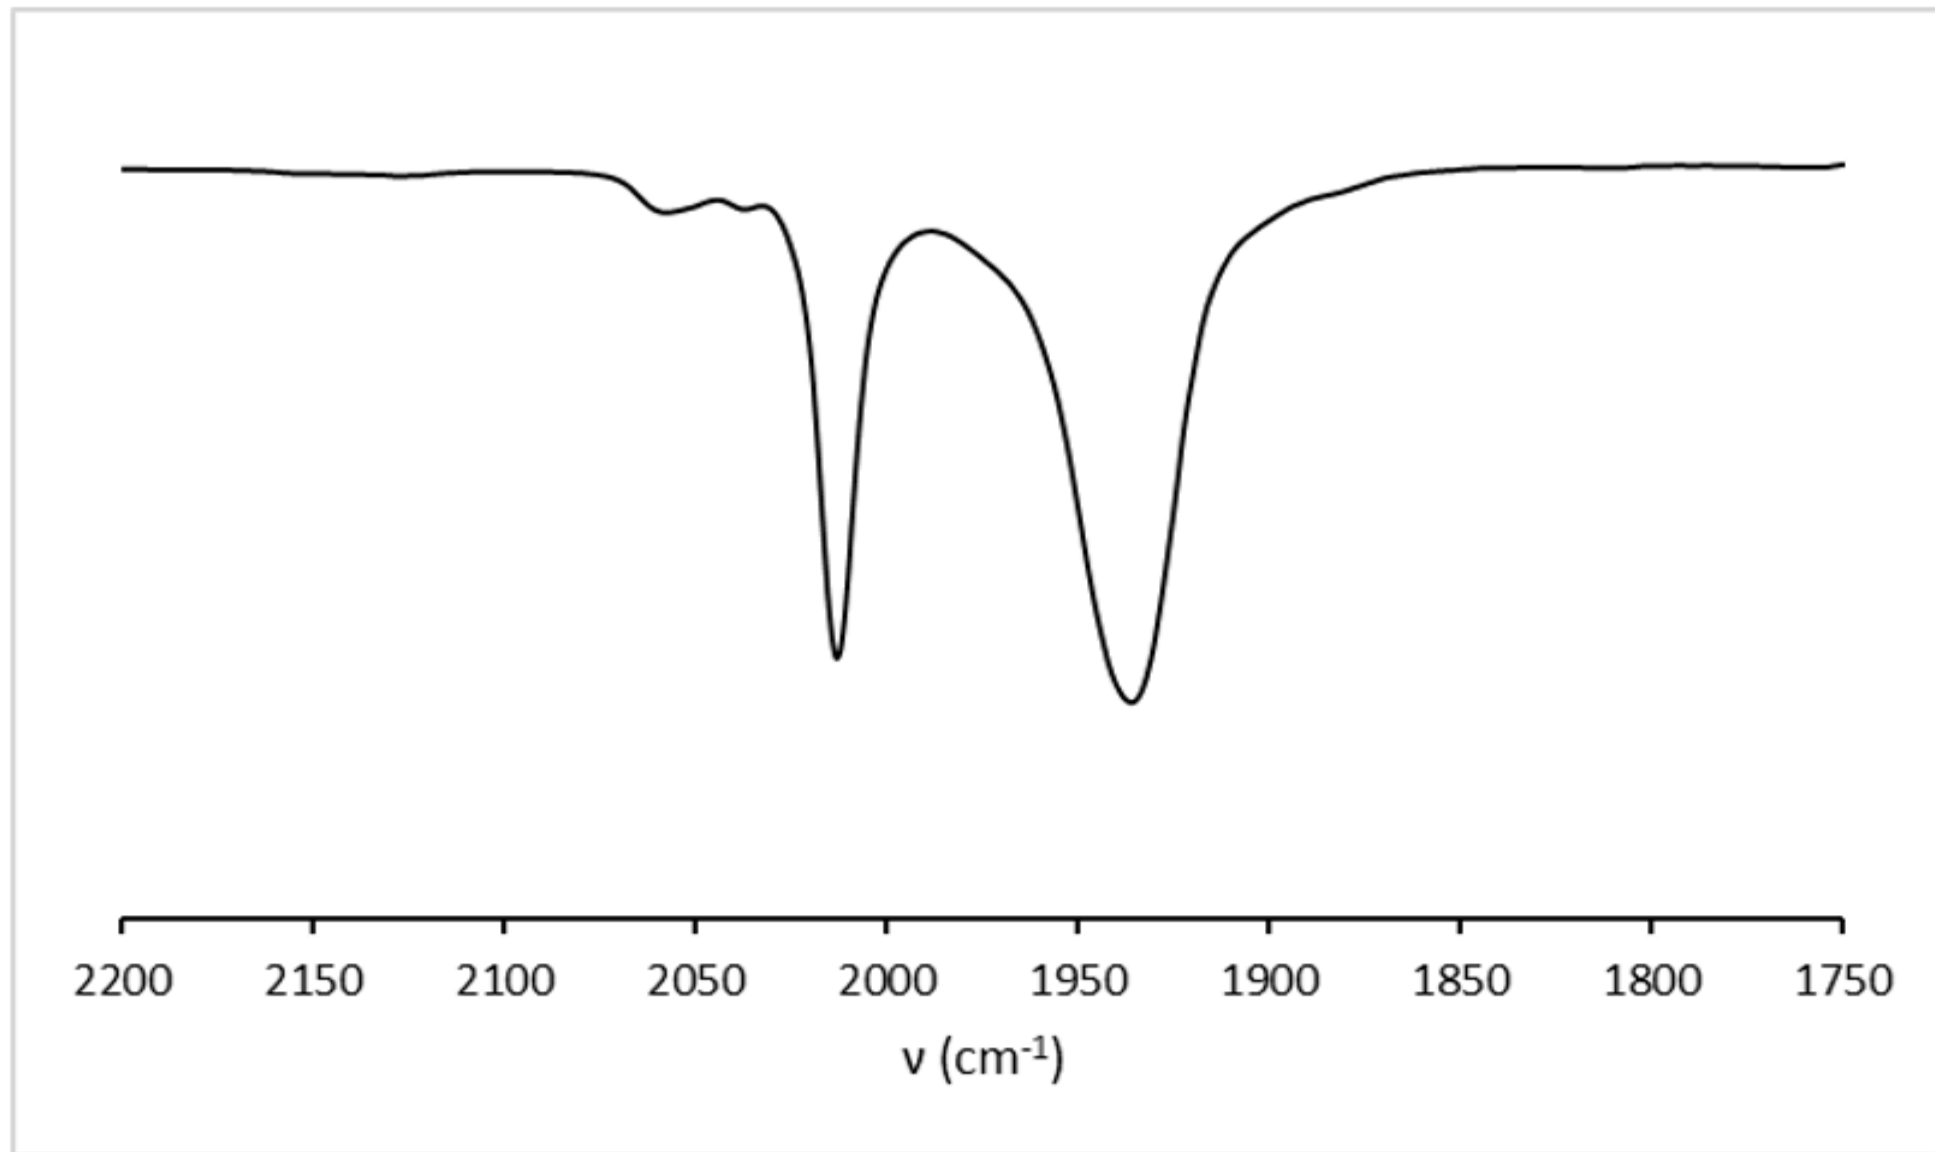

Figure S11. IR Spectrum (CH<sub>2</sub>Cl<sub>2</sub>, 295 K,  $\nu$  cm<sup>-1</sup>) of [W(AsC<sub>4</sub>Ph<sub>4</sub>)(CO)<sub>3</sub>( $\eta^5$ -C<sub>5</sub>H<sub>5</sub>)] (**2b**)

4  $[\text{Fe}(\text{AsC}_4\text{Ph}_4)(\text{CO})_2(\eta^5\text{-C}_5\text{H}_5)]$  (**3**)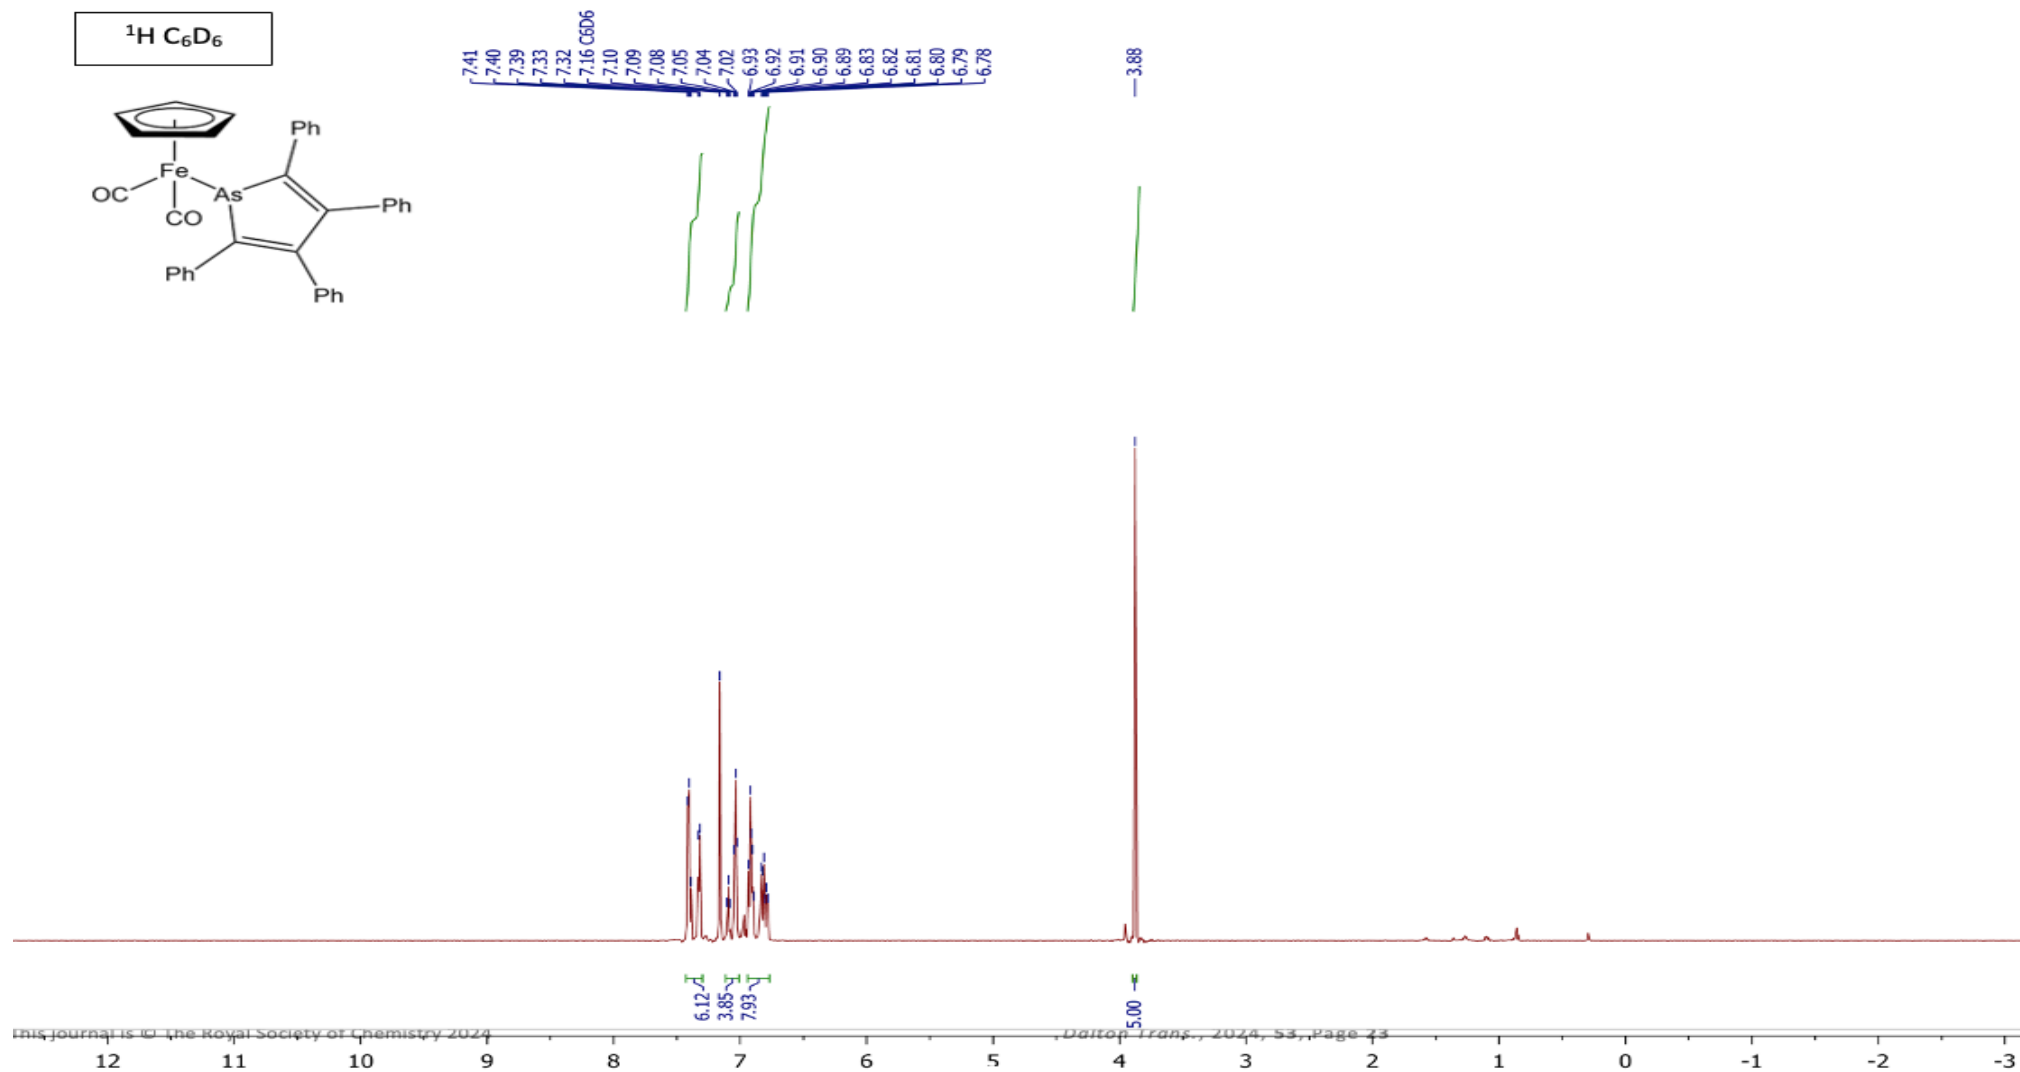**Figure S12.**  $^1\text{H NMR}$  Spectrum (CDCl<sub>3</sub>, 295 K, 400 MHz,  $\delta$ ) of  $[\text{Fe}(\text{AsC}_4\text{Ph}_4)(\text{CO})_2(\eta^5\text{-C}_5\text{H}_5)]$  (**3a**)

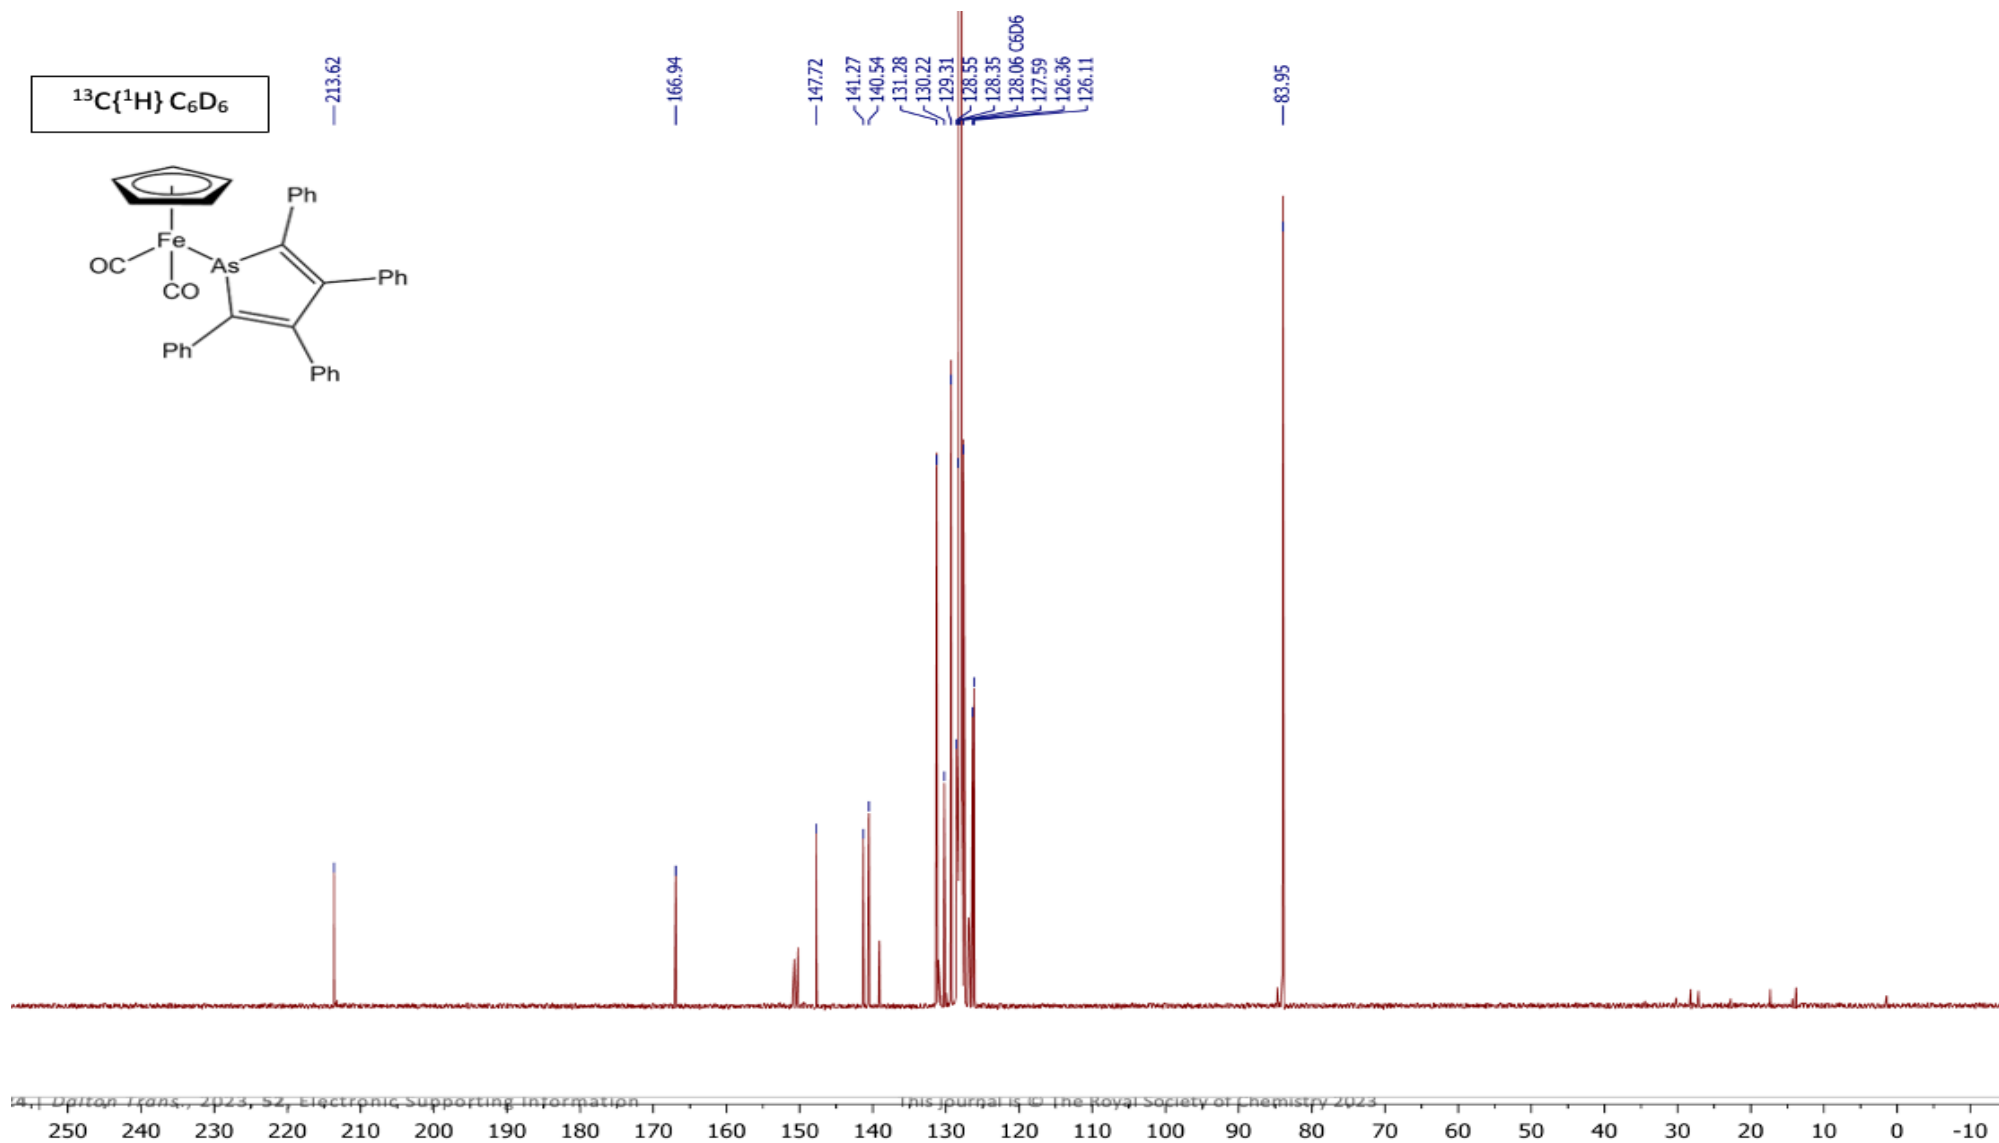

Figure S13.  $^{13}\text{C}\{^1\text{H}\}$  NMR Spectrum ( $\text{CDCl}_3$ , 295 K, 101 MHz,  $\delta$ ) of  $[\text{Fe}(\text{AsC}_6\text{Ph}_4)(\text{CO})_2(\eta^5\text{-C}_5\text{H}_5)]$  (3a)

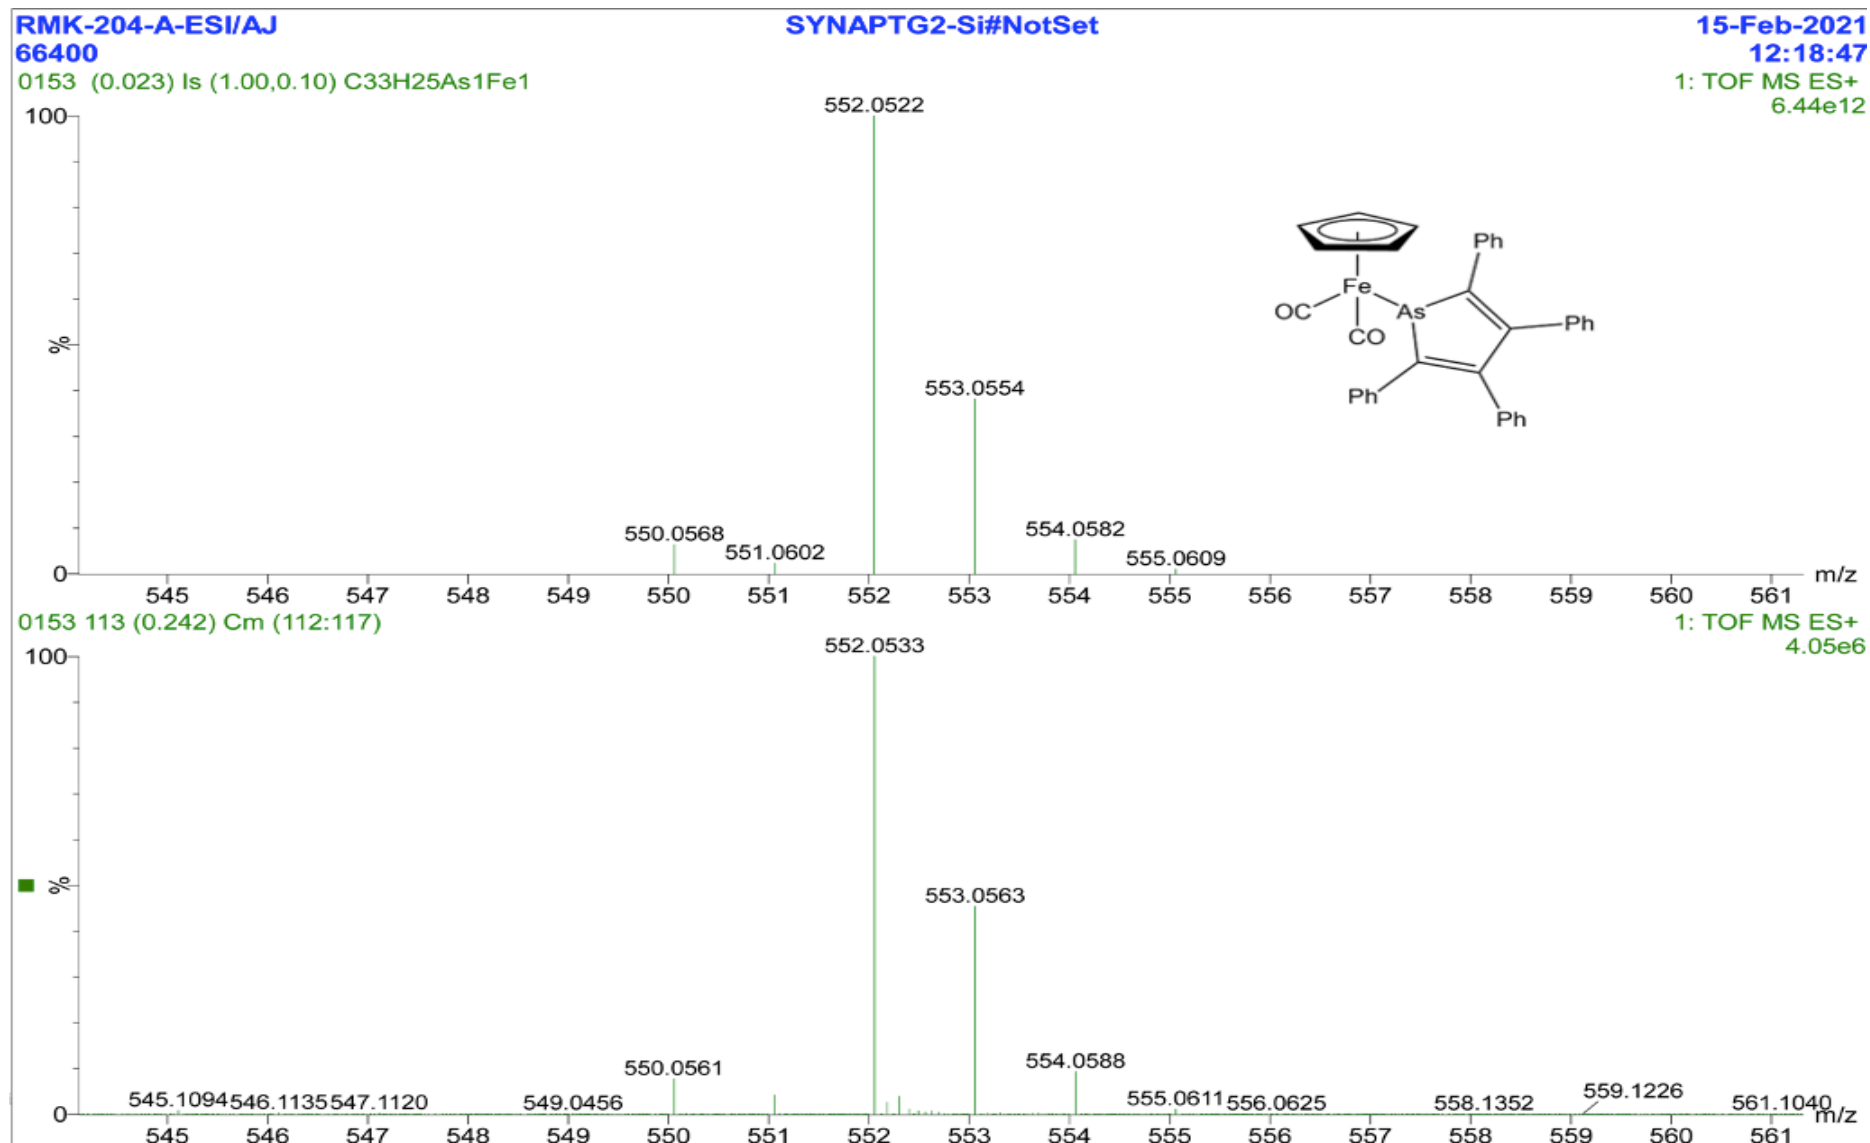

Figure S14. High Resolution Mass Spectrum (ESI-MS, MeCN) of [Fe(AsC<sub>4</sub>Ph<sub>4</sub>)(CO)<sub>2</sub>(η<sup>5</sup>-C<sub>5</sub>H<sub>5</sub>)] (3a)

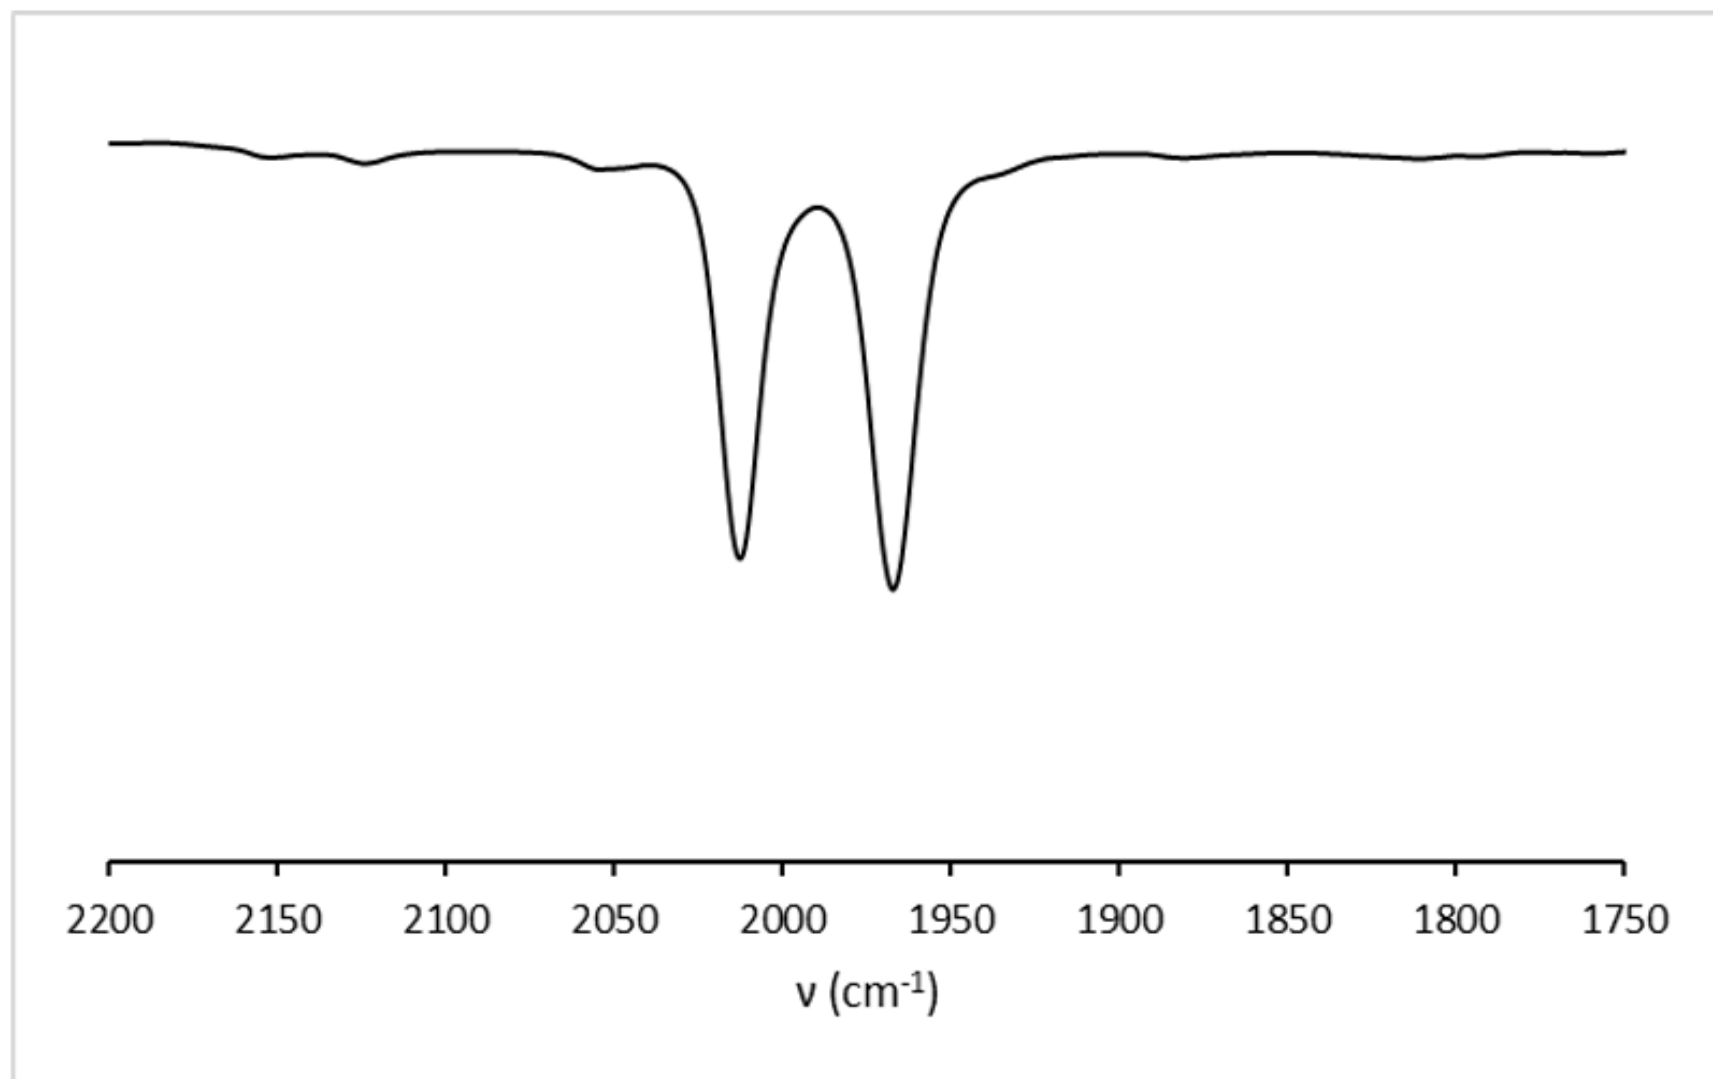

Figure S15. IR Spectrum (CH<sub>2</sub>Cl<sub>2</sub>, 295 K,  $\nu$  cm<sup>-1</sup>) of [Fe(AsC<sub>4</sub>Ph<sub>4</sub>)(CO)<sub>2</sub>( $\eta^5$ -C<sub>5</sub>H<sub>5</sub>)] (**3a**)



5  $[\text{Mo}(\text{AsC}_4\text{Me}_4)(\text{CO})_3(\eta^5\text{-C}_5\text{H}_5)]$  (**2c**)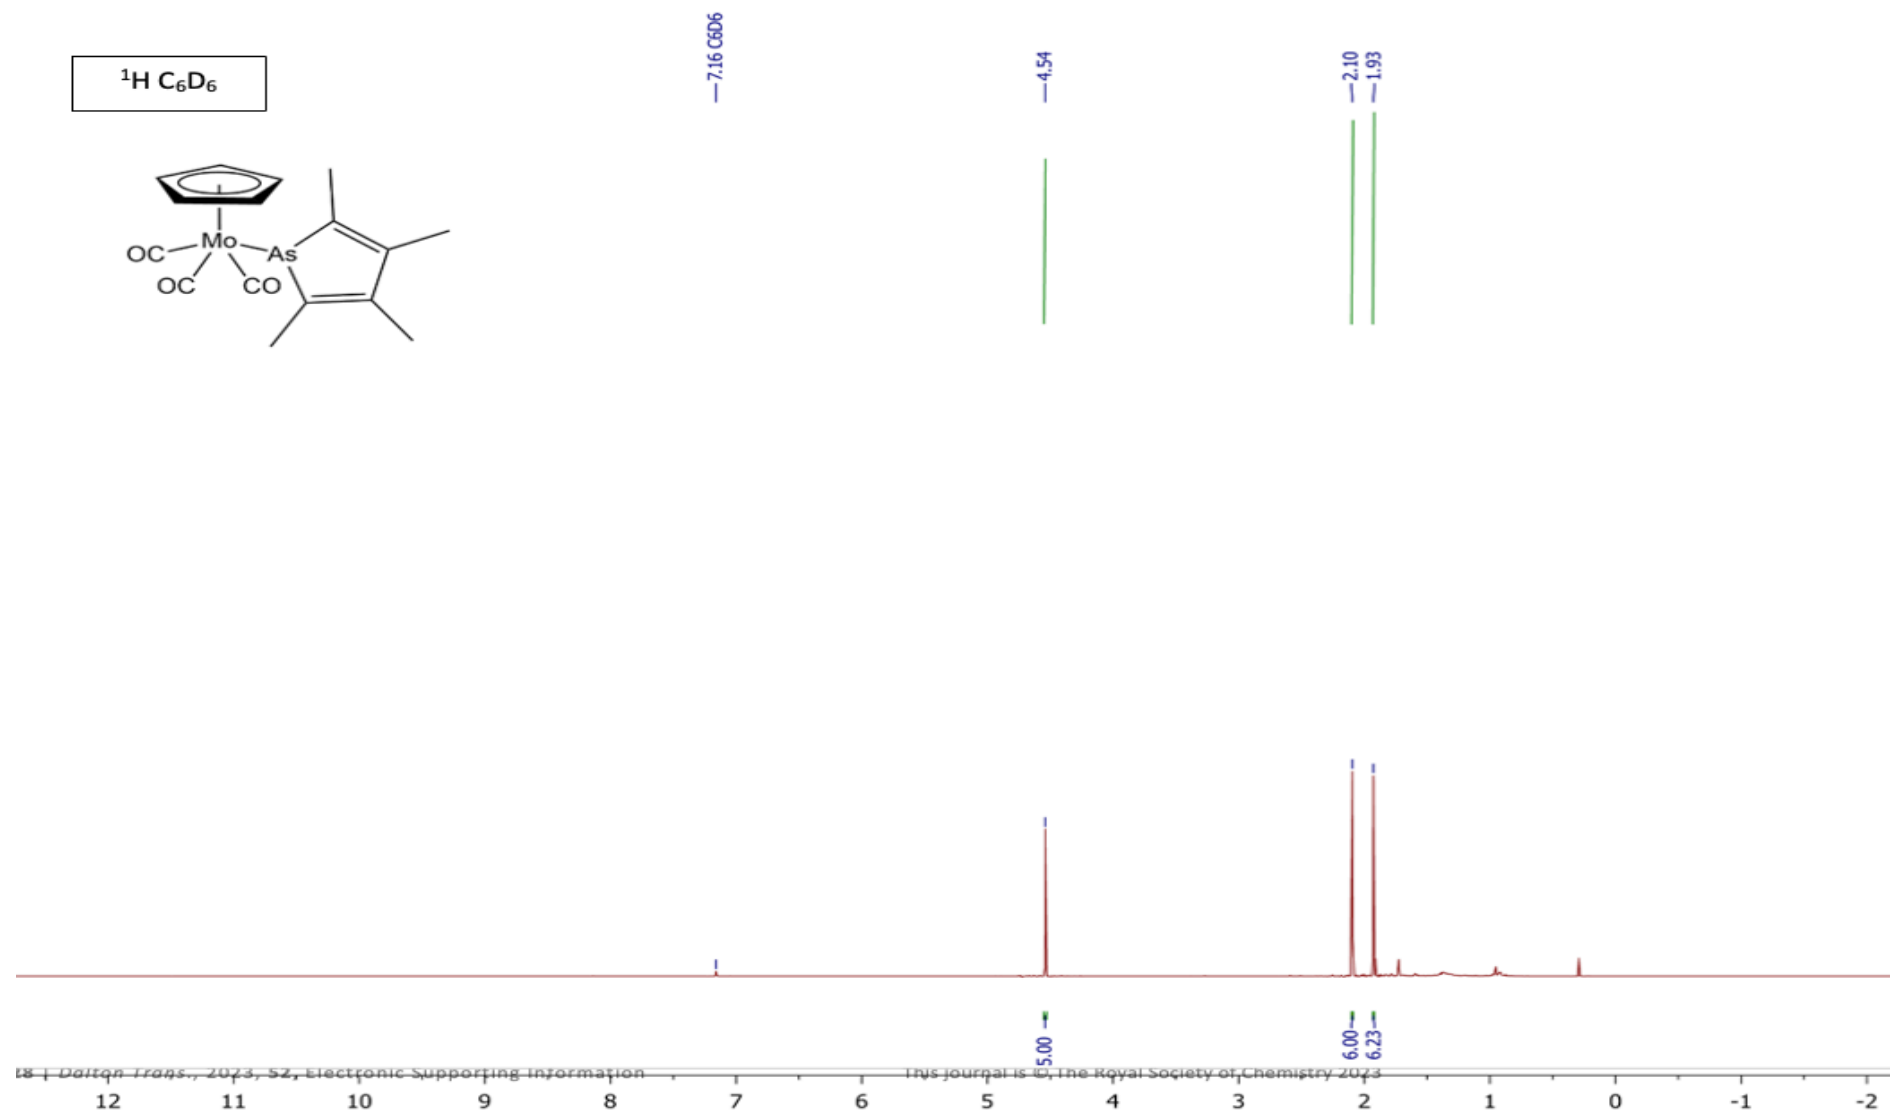**Figure S16.**  $^1\text{H}$  NMR Spectrum ( $\text{CDCl}_3$ , 295 K, 400 MHz,  $\delta$ ) of  $[\text{Mo}(\text{AsC}_4\text{Me}_4)(\text{CO})_3(\eta^5\text{-C}_5\text{H}_5)]$  (**2c**)

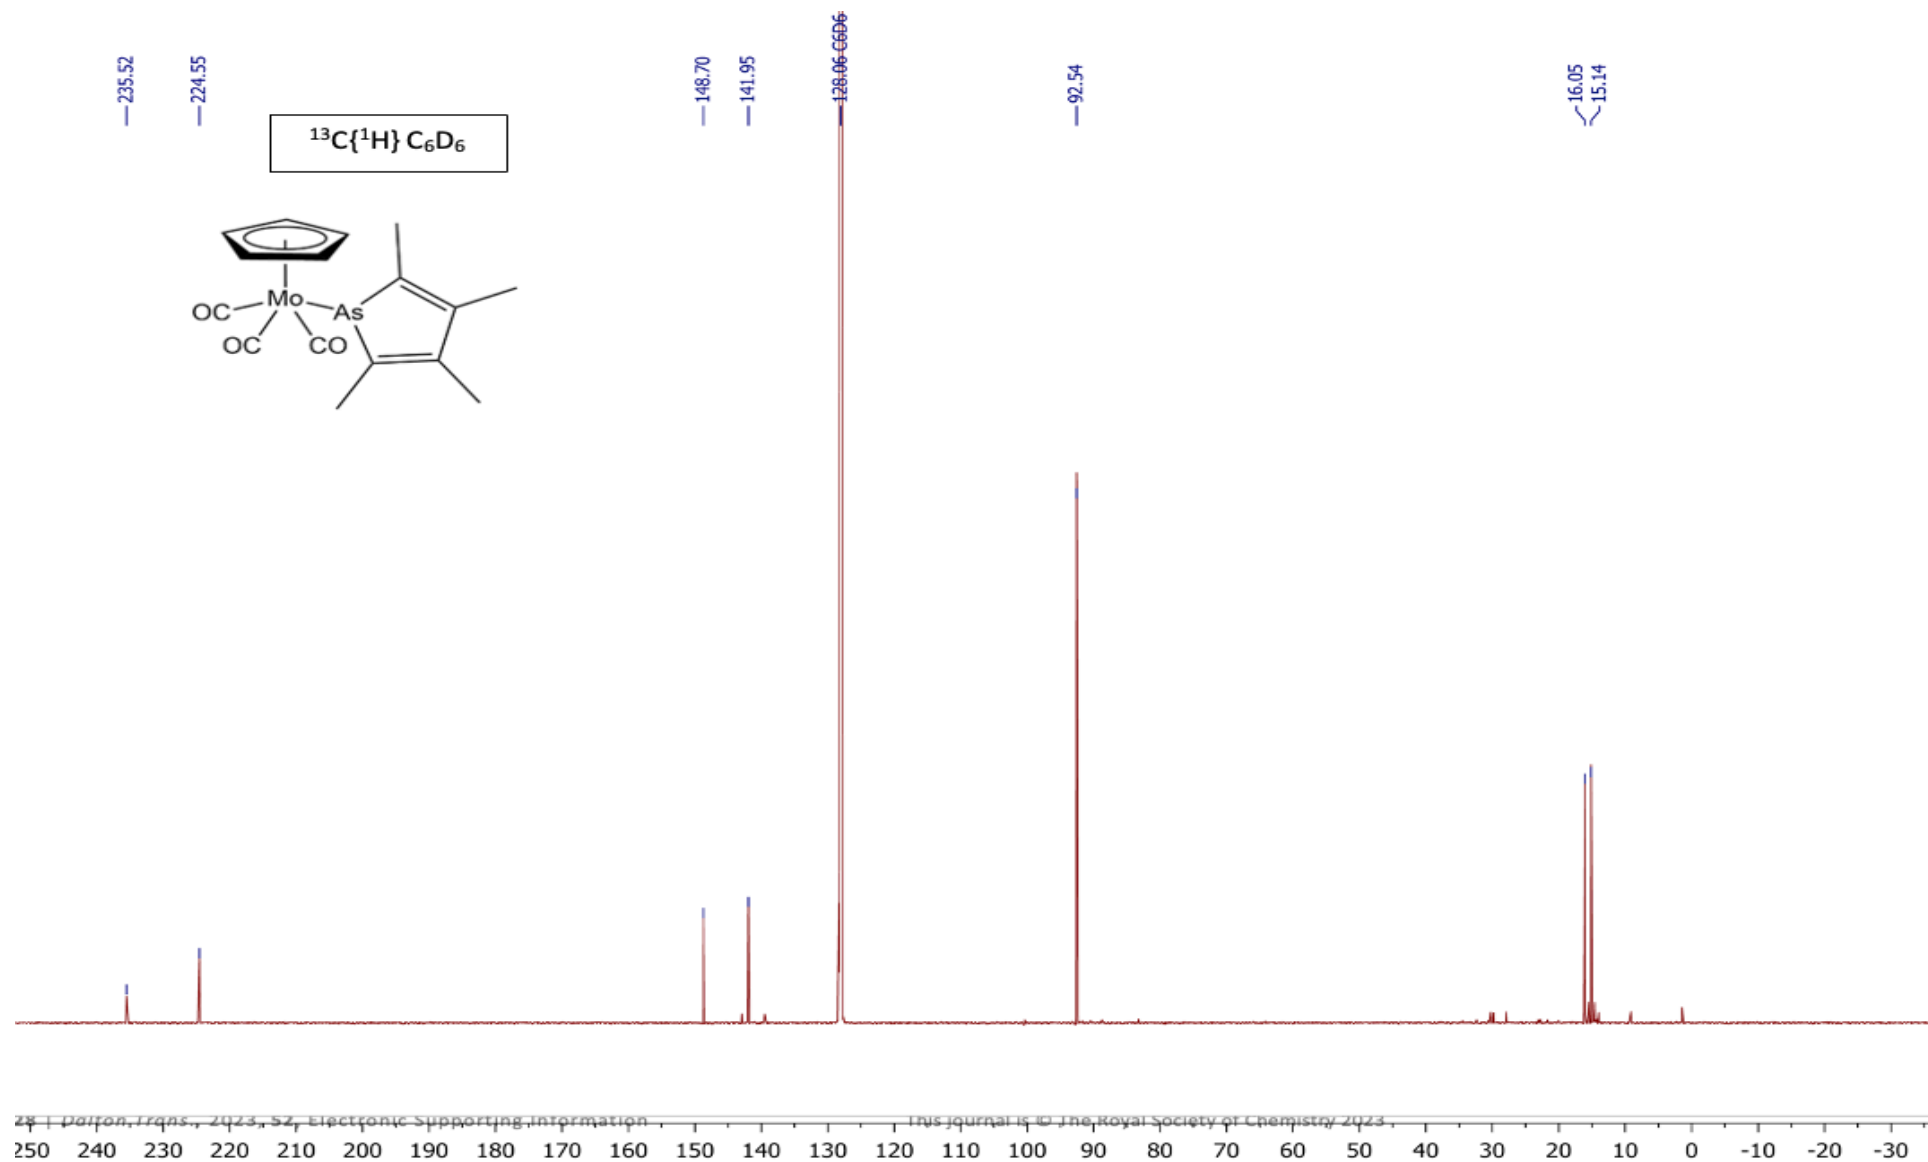

Figure S17.  $^{13}\text{C}\{^1\text{H}\}$  NMR Spectrum ( $\text{C}_6\text{D}_6$ , 295 K, 202 MHz,  $\delta$ ) of  $[\text{Mo}(\text{AsC}_4\text{Me}_6)(\text{CO})_3(\eta^5\text{-C}_5\text{H}_5)]$  (2c)

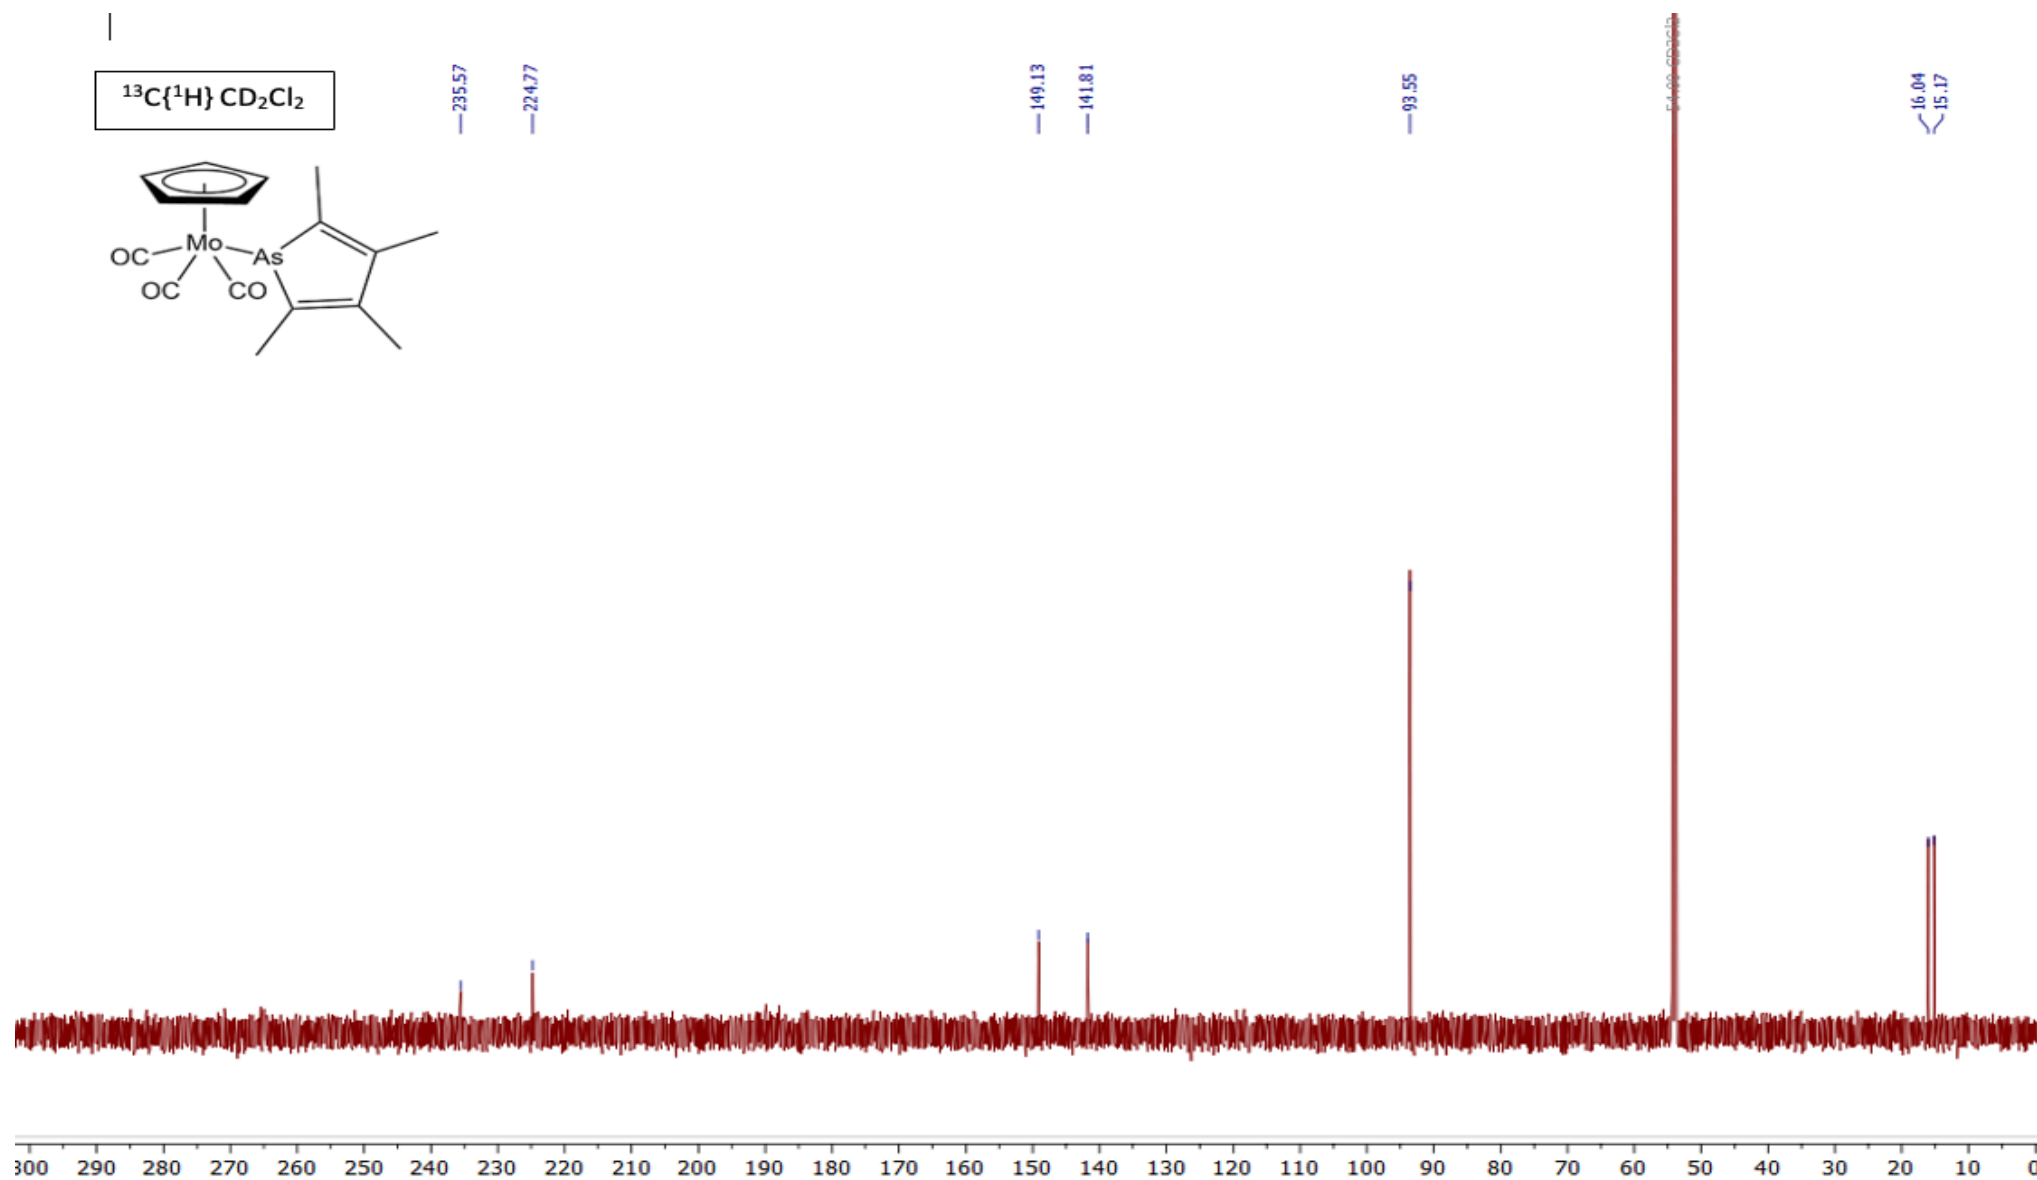

Figure S18.  $^{13}\text{C}\{^1\text{H}\}$  NMR Spectrum ( $\text{CD}_2\text{Cl}_2$ , 295 K, 101 MHz,  $\delta$ ) of  $[\text{Mo}(\text{AsC}_4\text{Me}_4)(\text{CO})_3(\eta^5\text{-C}_5\text{H}_5)]$  (2c)

RMK-219-A/AJ  
66780

SYNAPT G2-Si#NotSet

23-Jul-2021  
13:03:120784B (0.023) Is (1.00,0.10) C<sub>14</sub>H<sub>17</sub>As<sub>1</sub>Mo<sub>1</sub>O1: TOF MS ES+  
2.22e12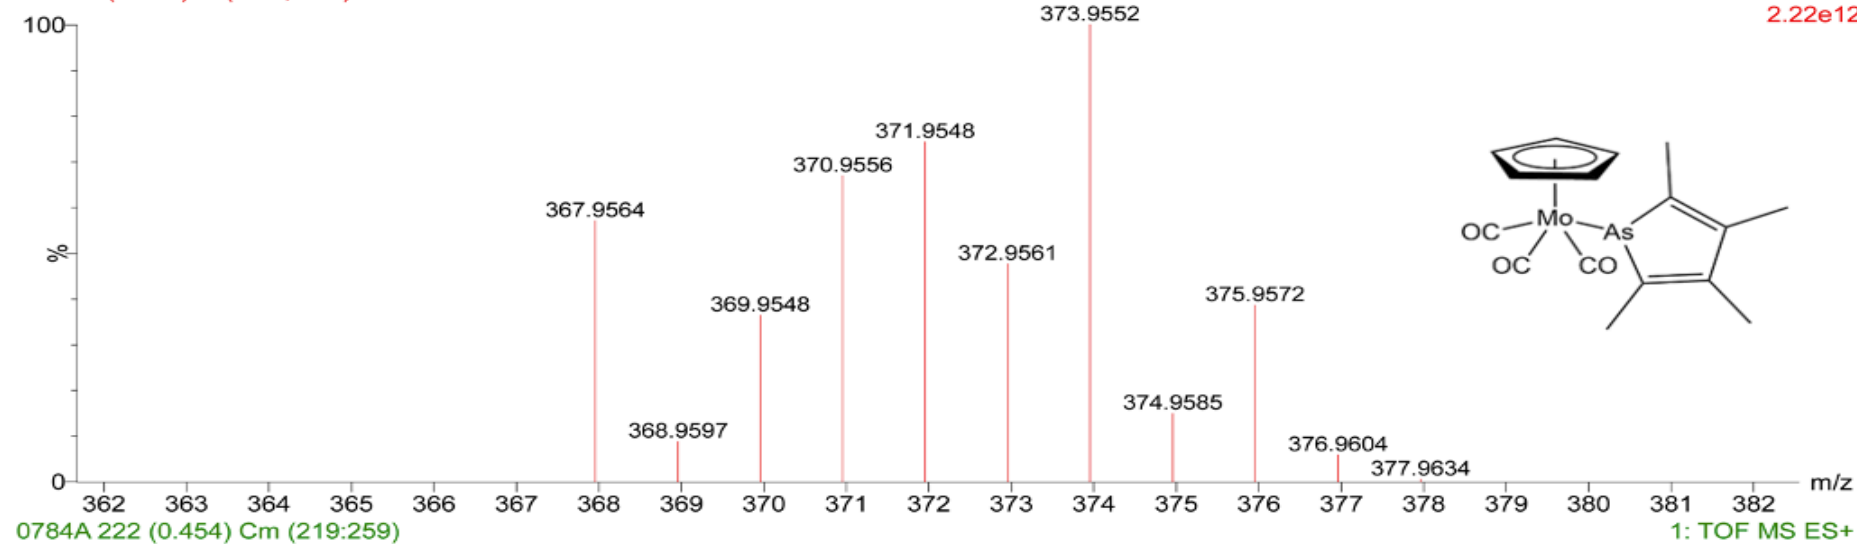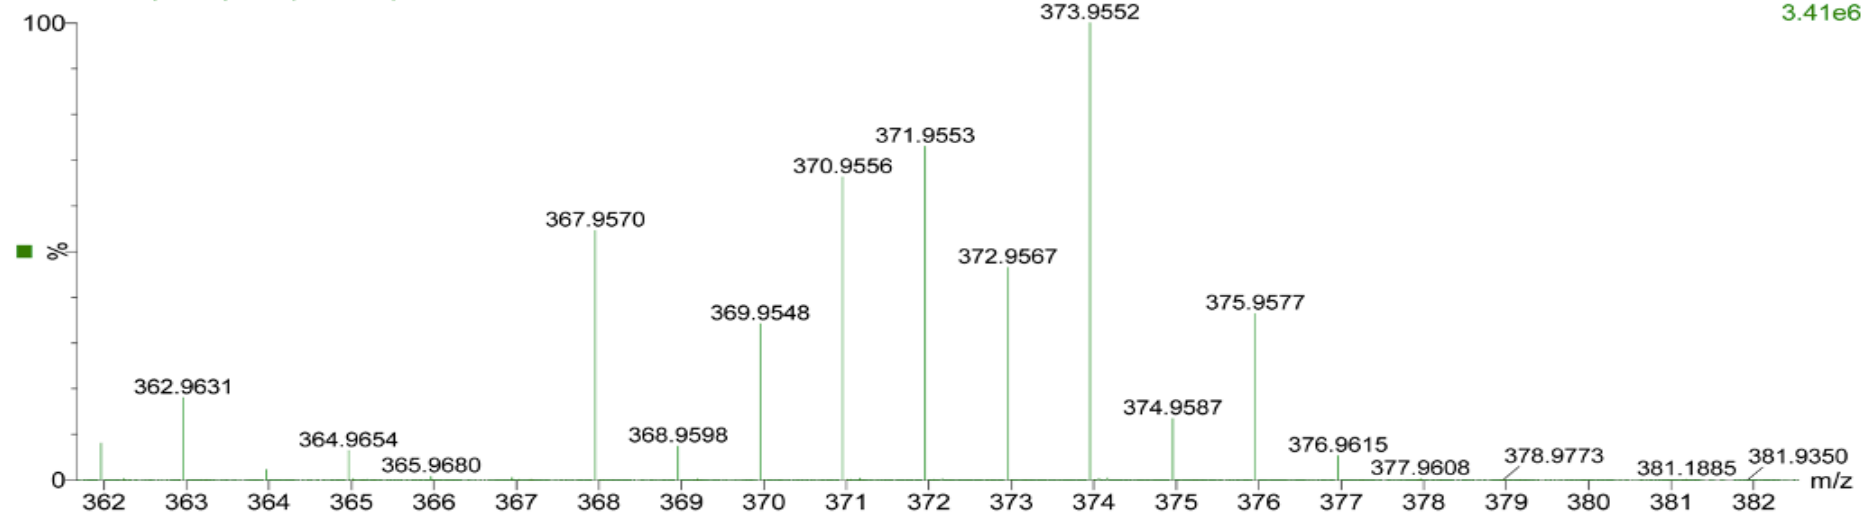Figure S19. High Resolution Mass Spectrum (ESI-MS, MeCN) of [Mo(AsC<sub>4</sub>Me<sub>4</sub>)(CO)<sub>3</sub>(η<sup>5</sup>-C<sub>5</sub>H<sub>5</sub>)] (2c)

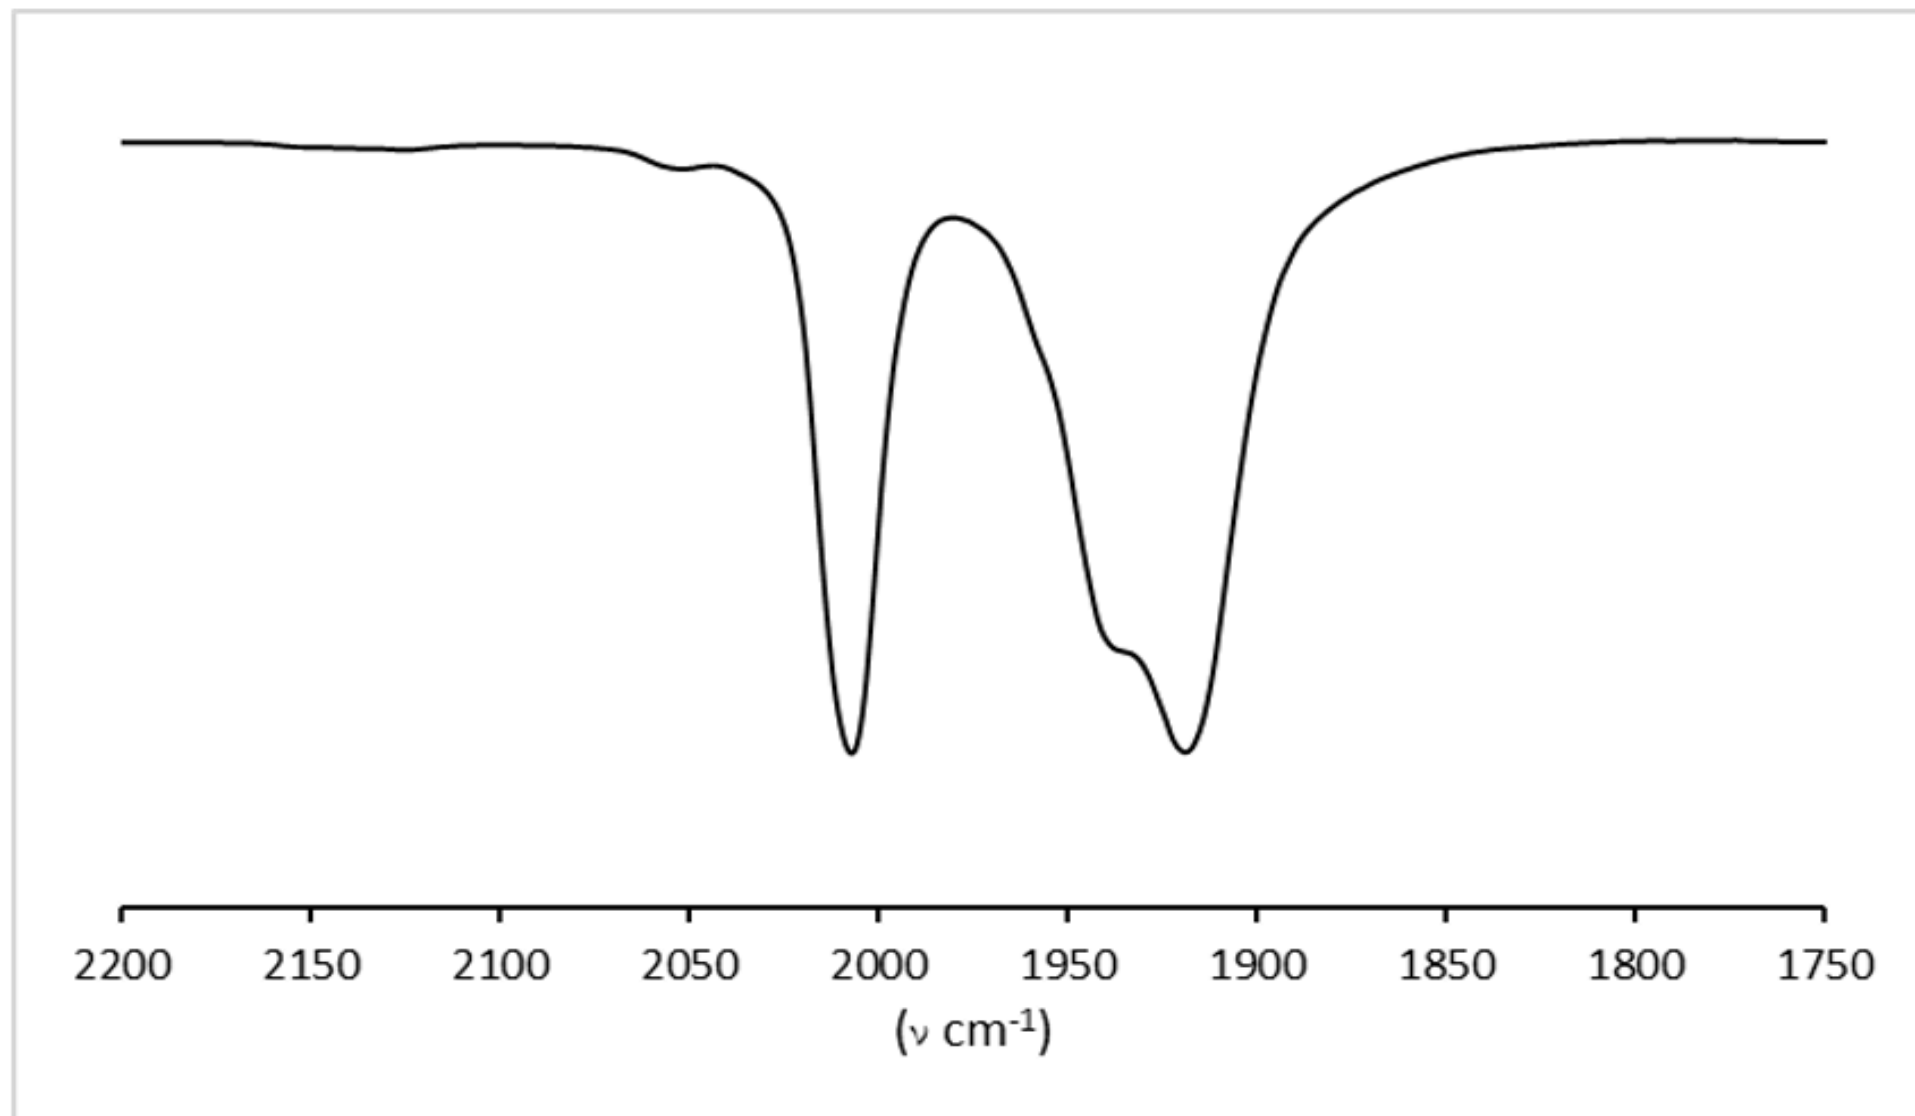

Figure S20. IR Spectrum ( $\text{CH}_2\text{Cl}_2$ , 295 K,  $\nu \text{ cm}^{-1}$ ) of  $[\text{Mo}(\text{AsC}_4\text{Me}_4)(\text{CO})_3(\eta^5\text{-C}_5\text{H}_5)]$  (**2c**)

6  $[\text{W}(\text{AsC}_4\text{Me}_4)(\text{CO})_3(\eta^5\text{-C}_5\text{H}_5)]$  (**2d**)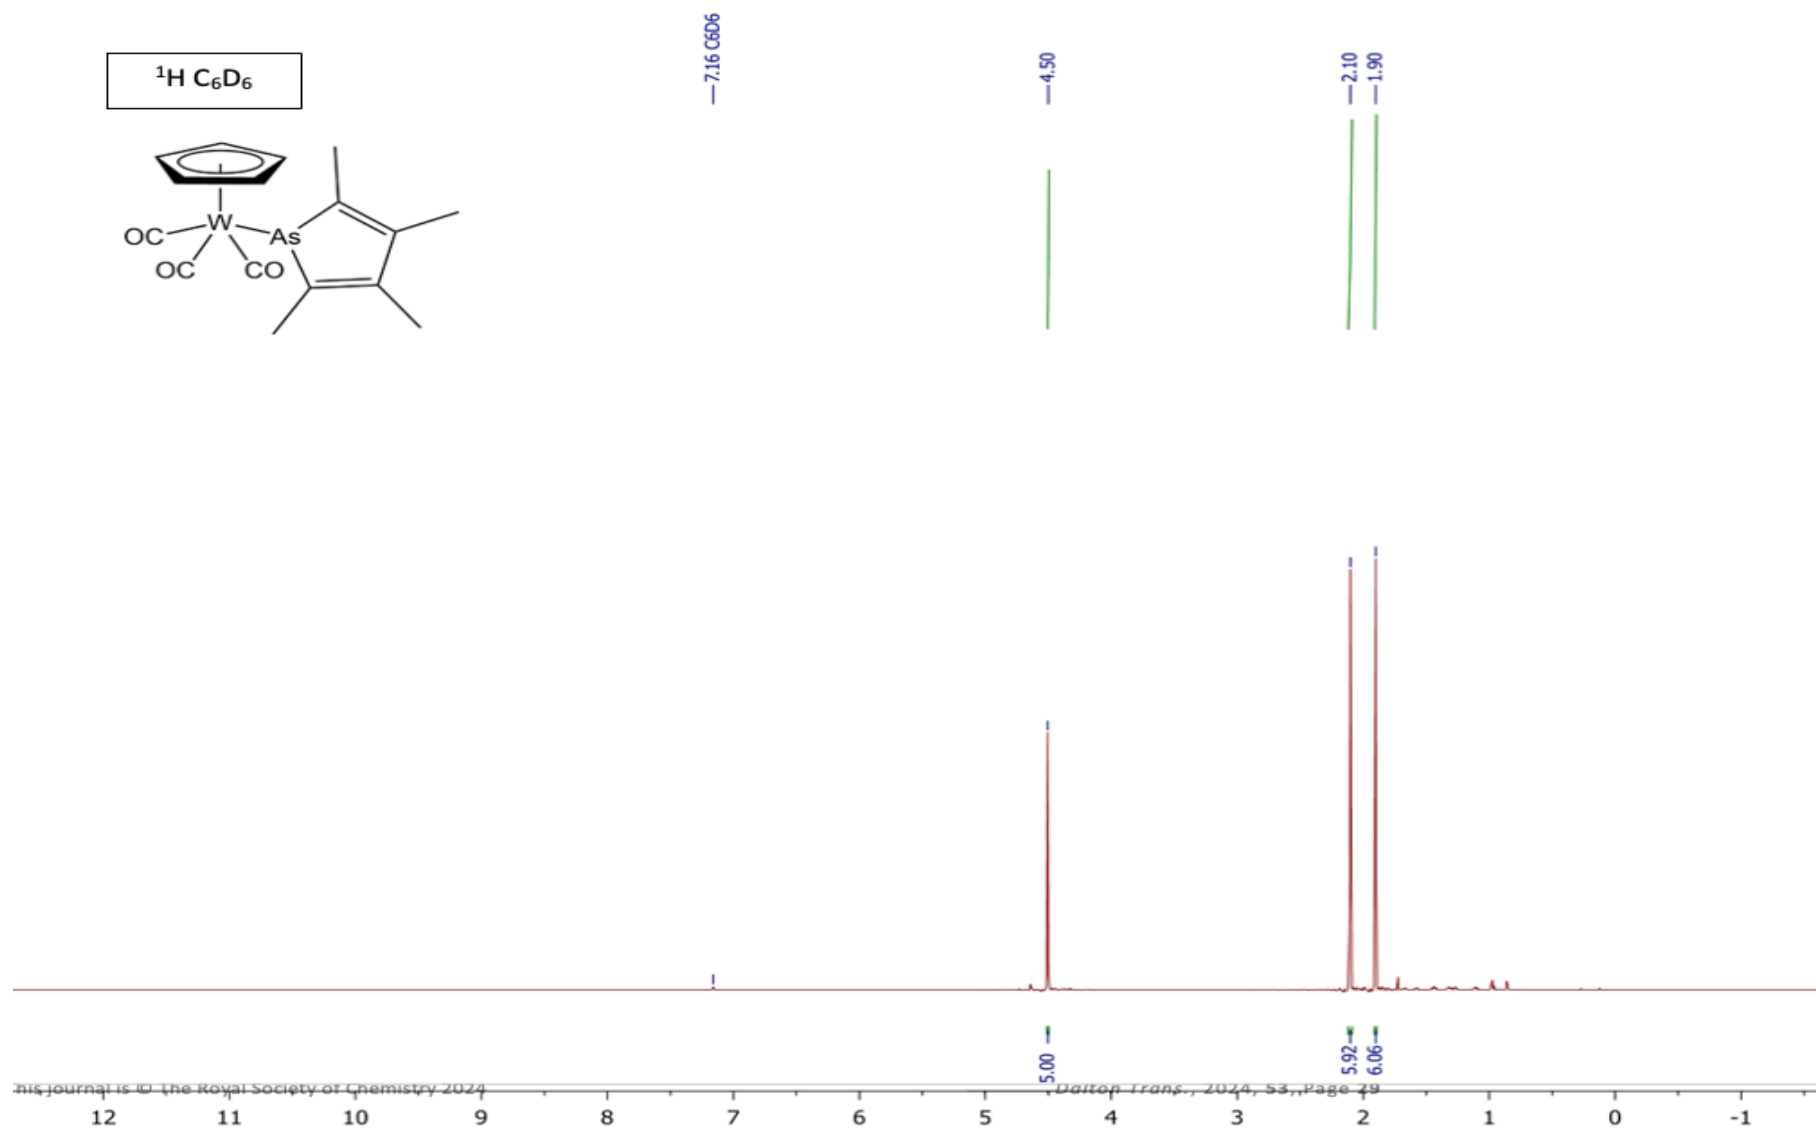Figure S21.  $^1\text{H}$  NMR Spectrum (CDCl<sub>3</sub>, 295 K, 400 MHz,  $\delta$ ) of  $[\text{W}(\text{AsC}_4\text{Me}_4)(\text{CO})_3(\eta^5\text{-C}_5\text{H}_5)]$  (**2d**)

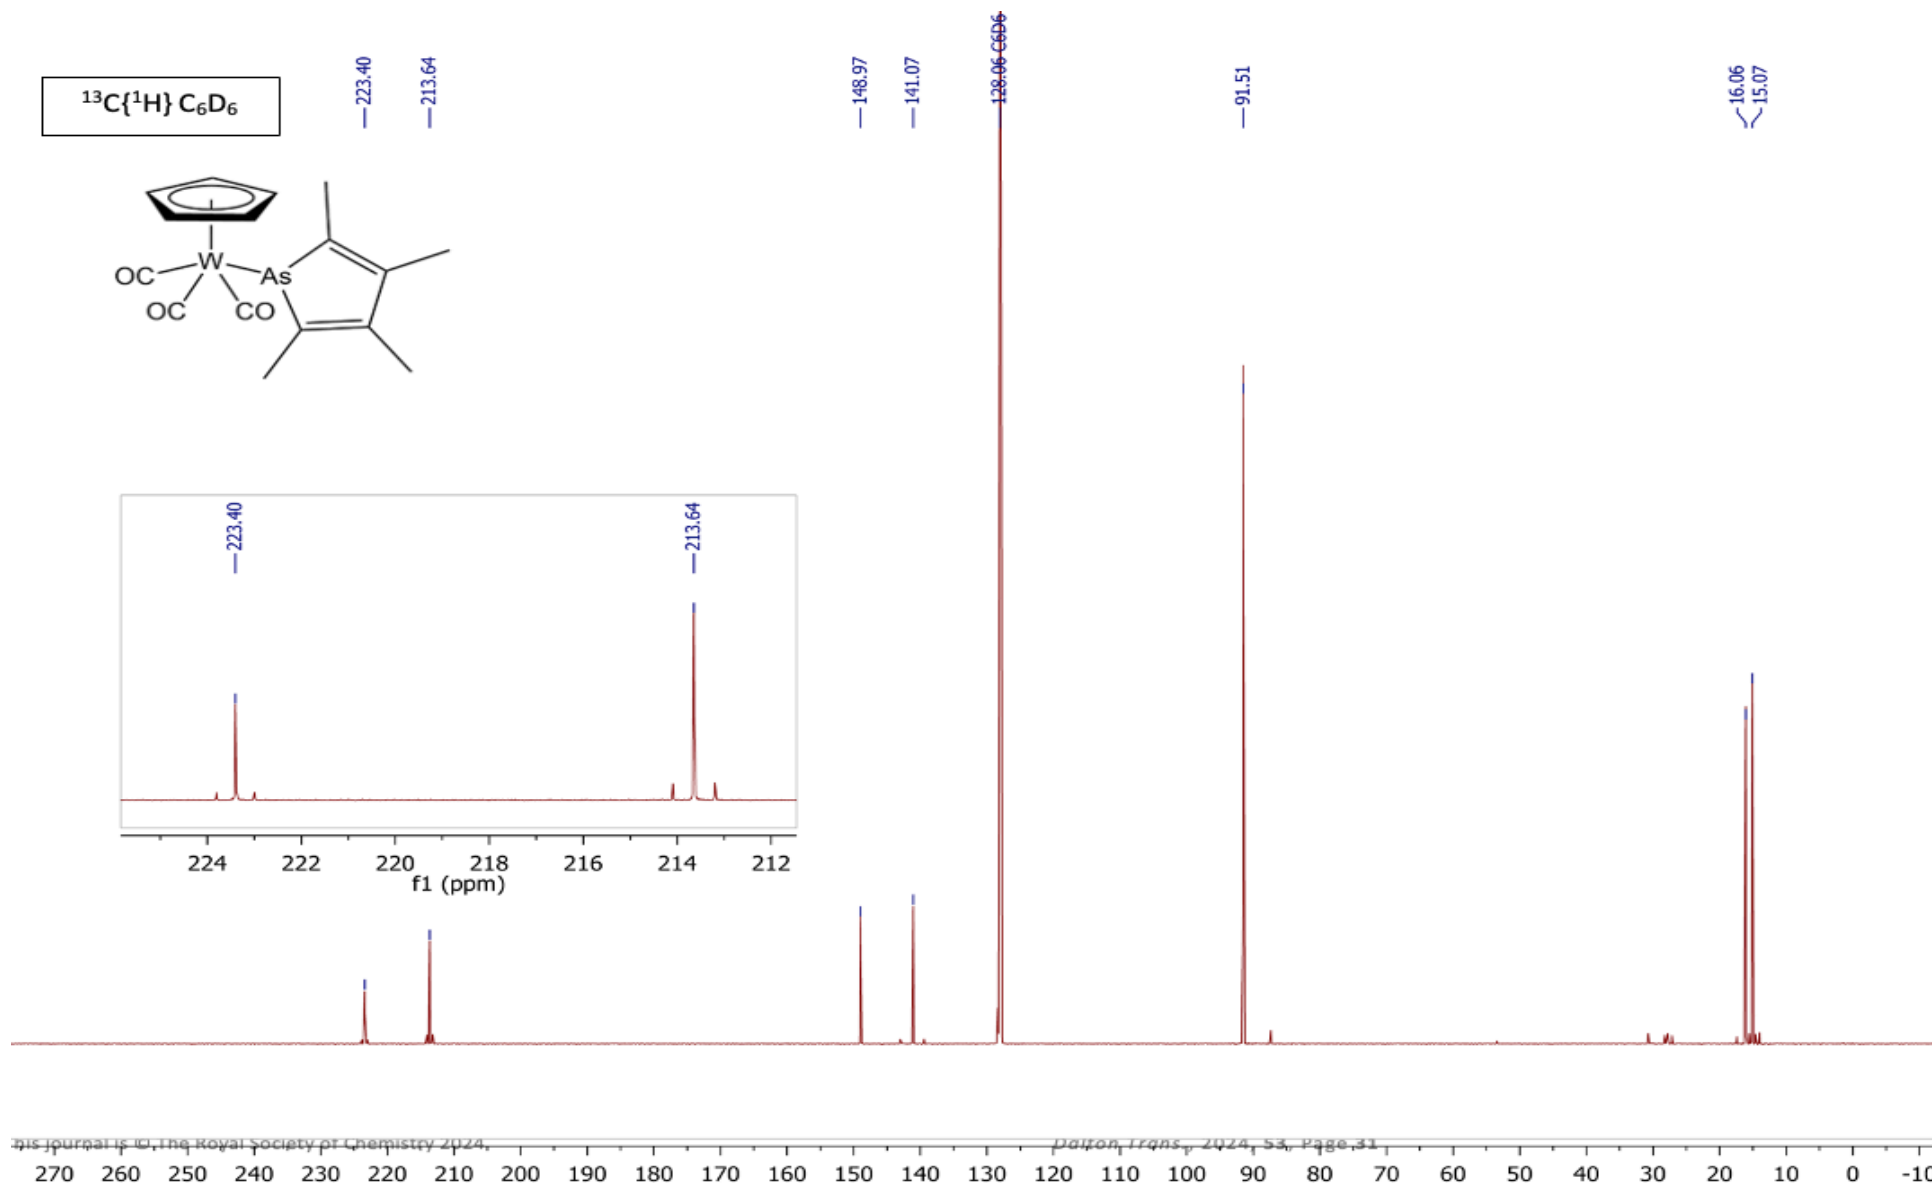

Figure S22.  $^{13}\text{C}\{^1\text{H}\}$  NMR Spectrum ( $\text{CDCl}_3$ , 295 K, 202 MHz,  $\delta$ ) of  $[\text{W}(\text{AsC}_4\text{Me}_4)(\text{CO})_3(\eta^5\text{-C}_5\text{H}_5)]$  (**2d**)

RMK-232/AJ  
66956

SYNAPT G2-Si#NotSet

17-Feb-2022  
14:02:472195 (0.023) Is (1.00,0.10) C<sub>16</sub>H<sub>17</sub>As<sub>1</sub>O<sub>4</sub>W<sub>1</sub>1: TOF MS ES+  
2.81e12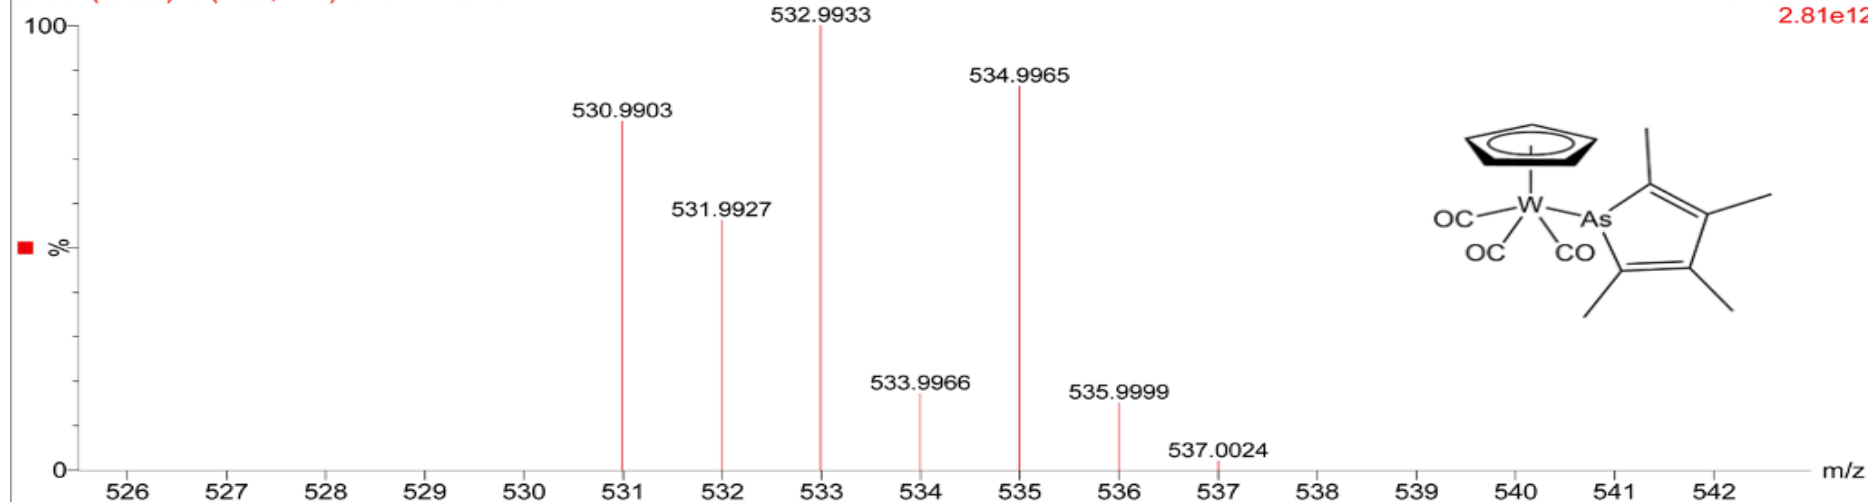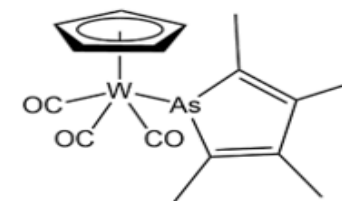

2195 88 (0.194) Cm (88:105)

1: TOF MS ES+  
4.88e6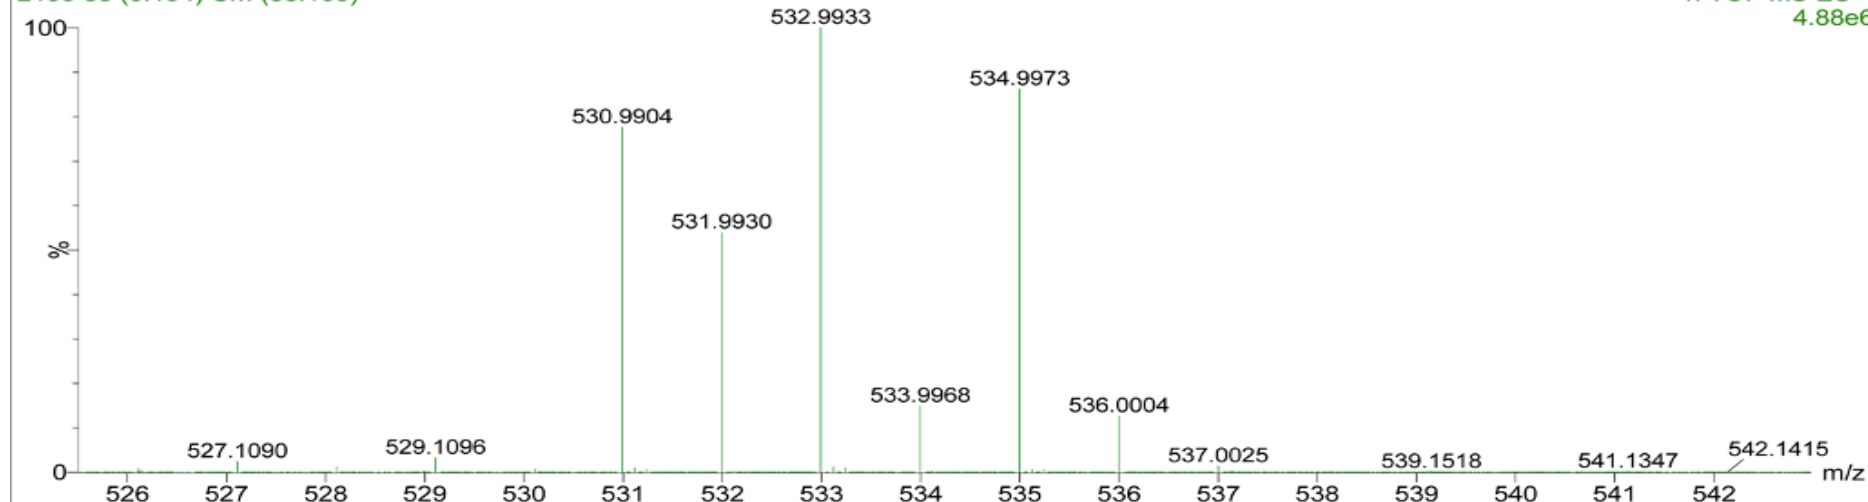Figure S23. High Resolution Mass Spectrum (ESI-MS, MeCN) of [W(AsC<sub>6</sub>Me<sub>6</sub>)(CO)<sub>3</sub>(η<sup>5</sup>-C<sub>5</sub>H<sub>5</sub>)] (2d)



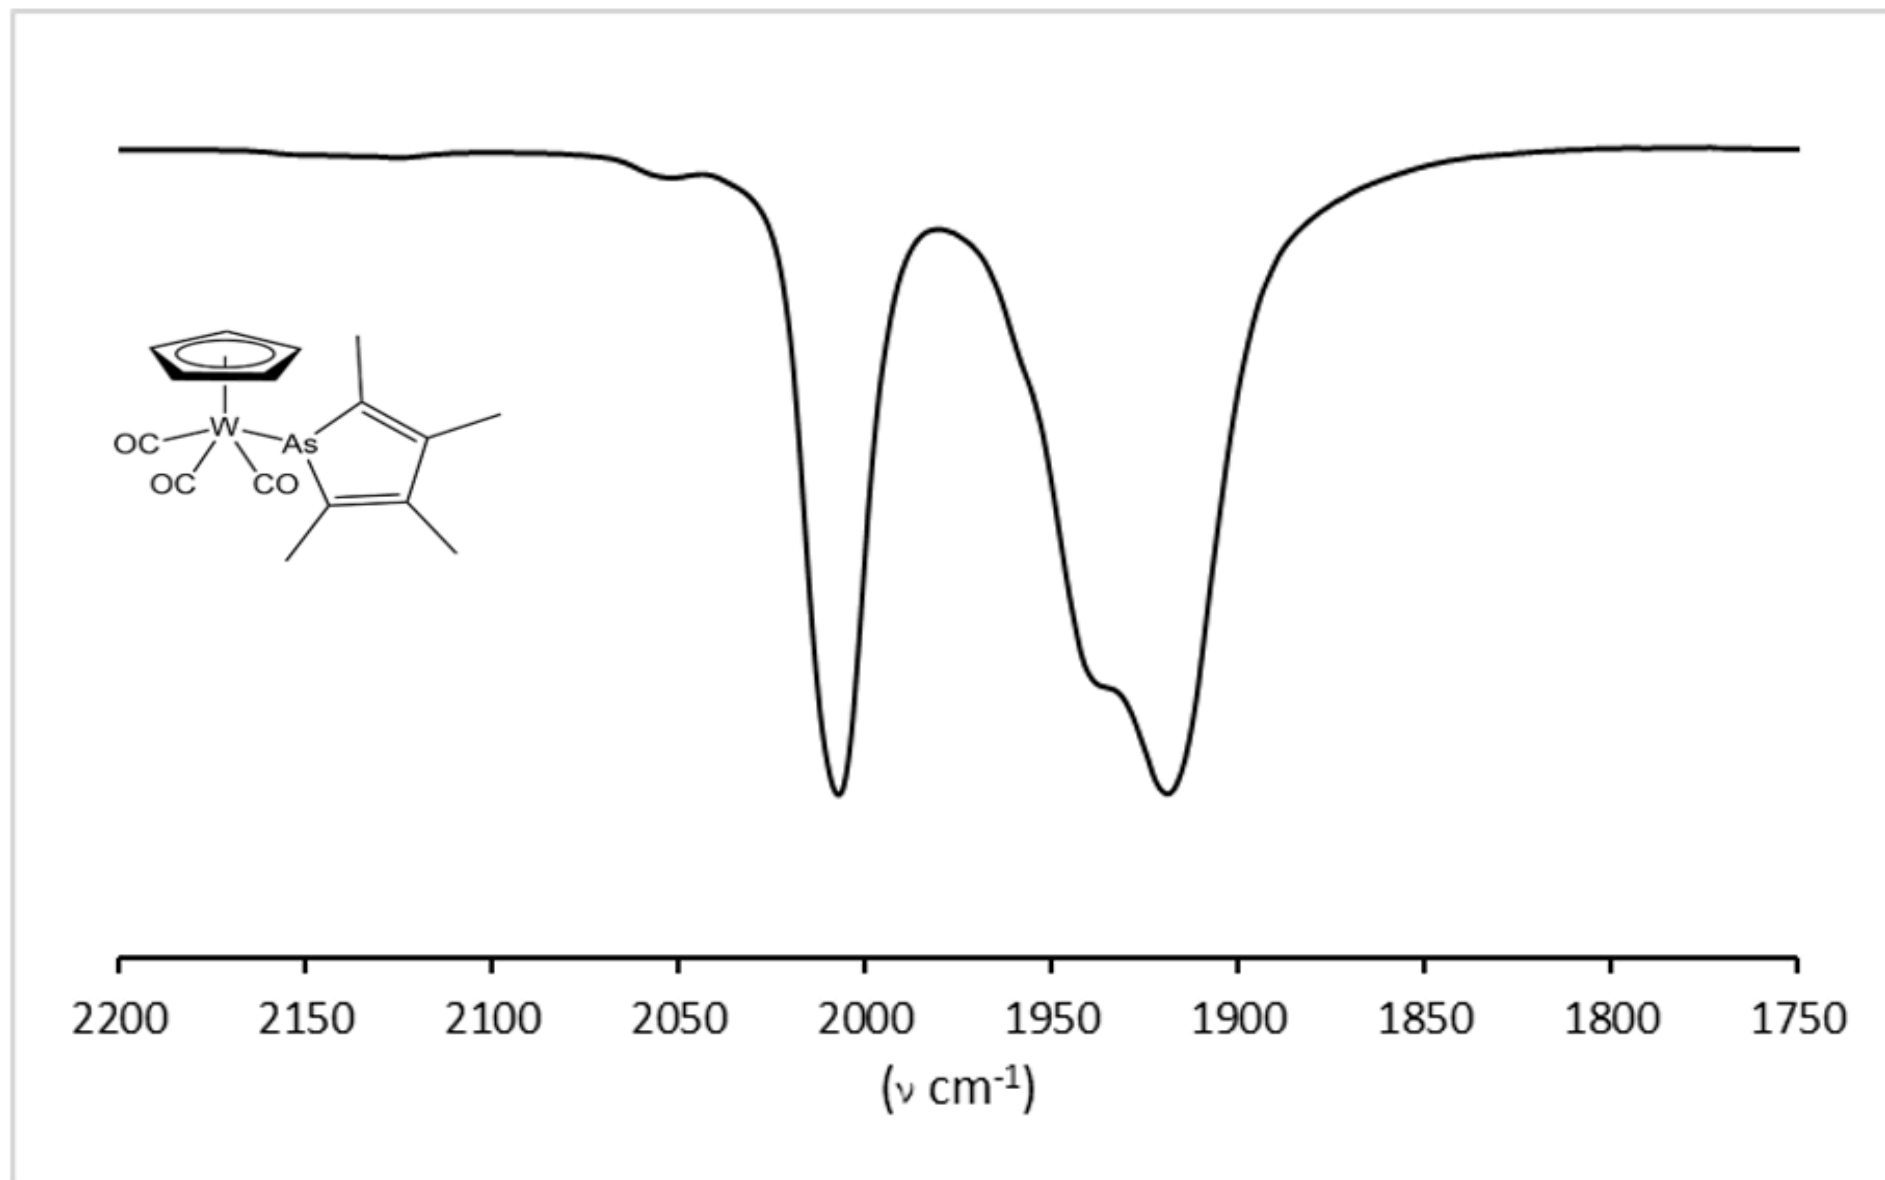

Figure S24. IR Spectrum (CH<sub>2</sub>Cl<sub>2</sub>, 295 K,  $\nu$  cm<sup>-1</sup>) of [W(AsC<sub>4</sub>Me<sub>4</sub>)(CO)<sub>3</sub>(η<sup>5</sup>-C<sub>5</sub>H<sub>5</sub>)] (2d)

7  $[\text{Mo}\{(\text{AsC}_4\text{H}(\text{SiMe}_3)\text{Me}_2)(\text{CO})_3(\eta^5\text{-C}_5\text{H}_5)\}]$  (**2e**)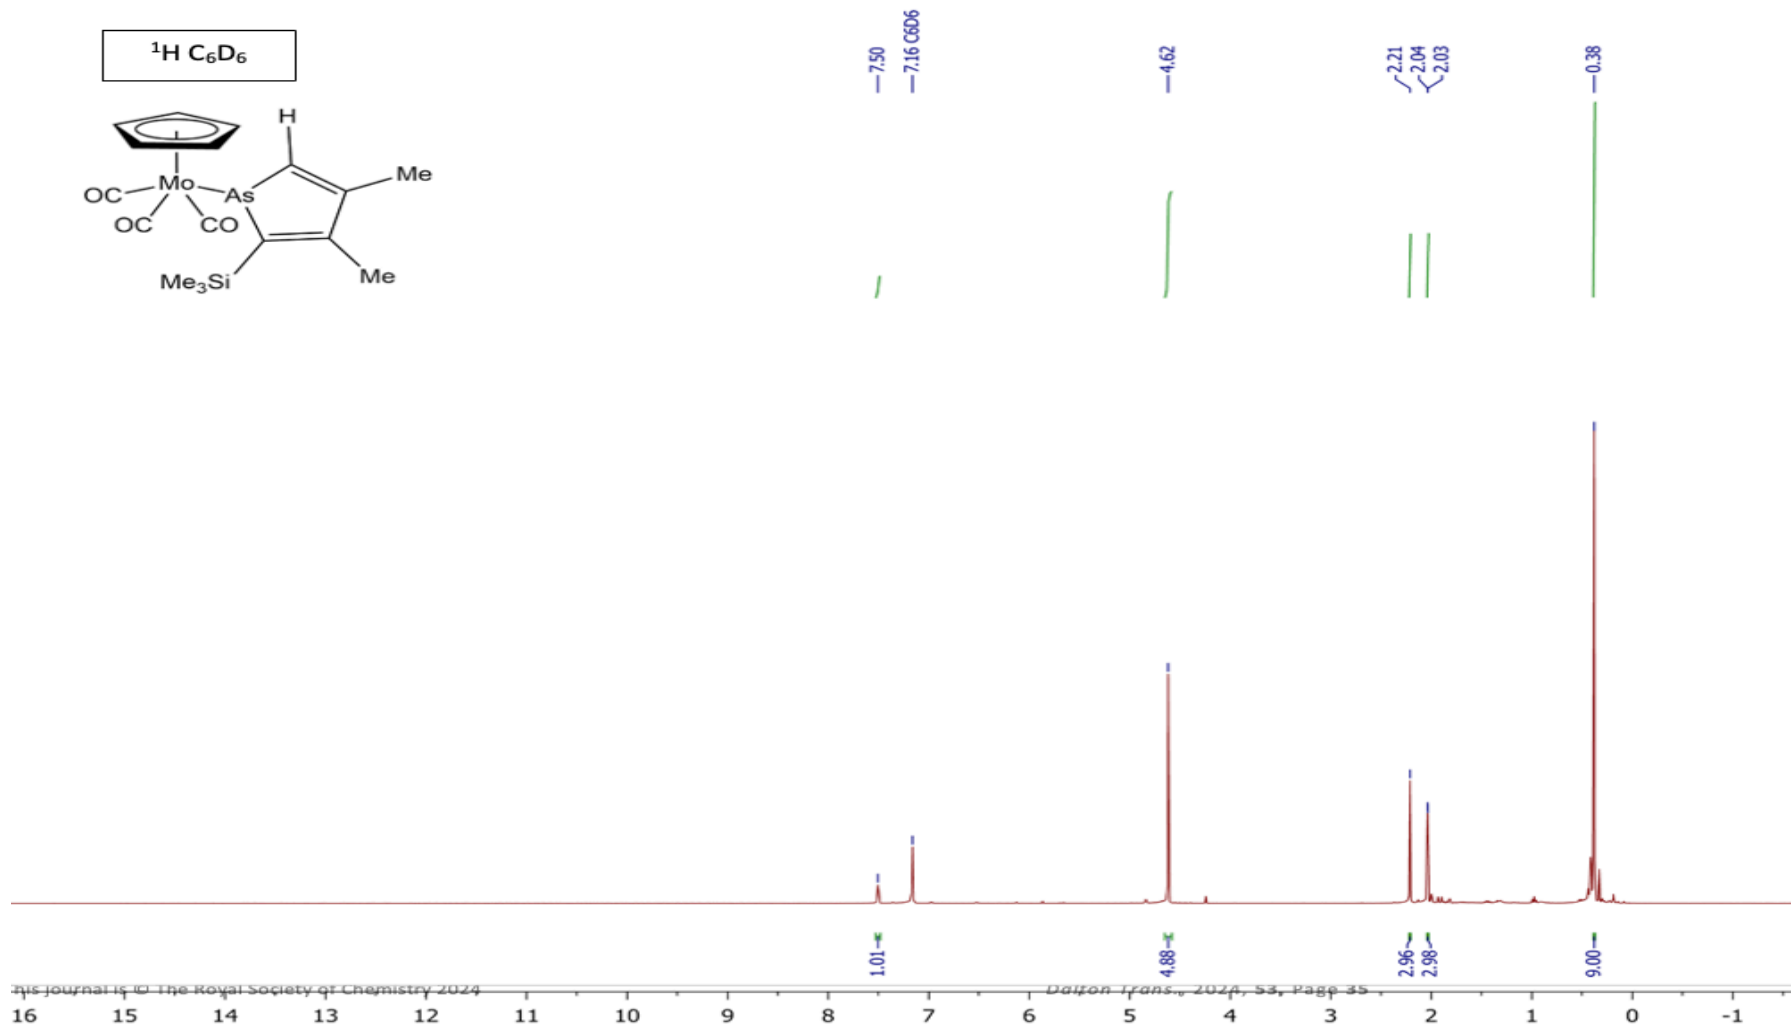**Figure S25.**  $^1\text{H}$  NMR Spectrum ( $\text{CDCl}_3$ , 295 K, 400 MHz,  $\delta$ ) of  $[\text{Mo}\{(\text{AsC}_4\text{H}(\text{SiMe}_3)\text{Me}_2)(\text{CO})_3(\eta^5\text{-C}_5\text{H}_5)\}]$  (**2e**)

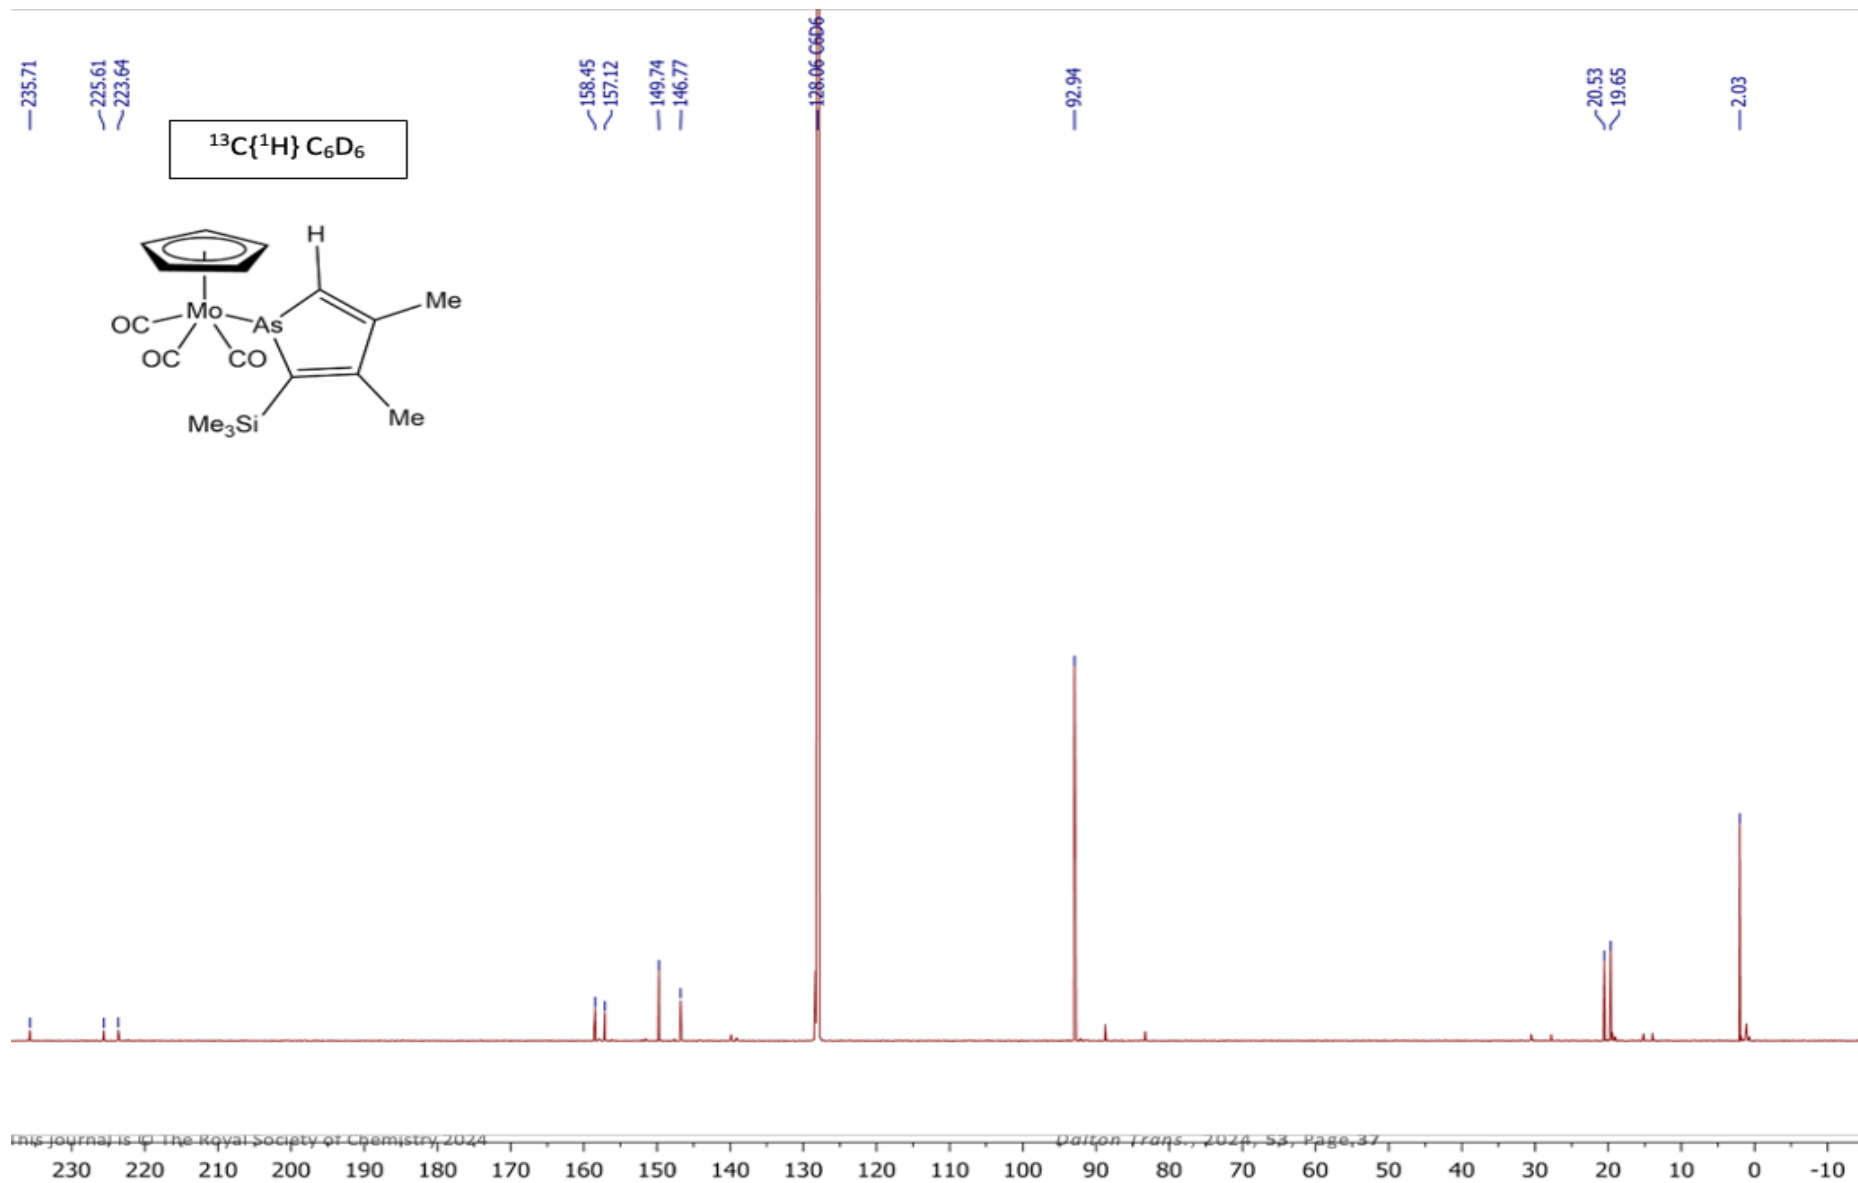

**Figure S26.**  $^{13}\text{C}\{^1\text{H}\}$  NMR Spectrum ( $\text{CDCl}_3$ , 295 K, 201 MHz,  $\delta$ ) of  $[\text{Mo}(\text{AsC}_4\text{H}(\text{SiMe}_3)\text{Me}_2)(\text{CO})_3(\eta^5\text{-C}_5\text{H}_5)]$  (**2e**)

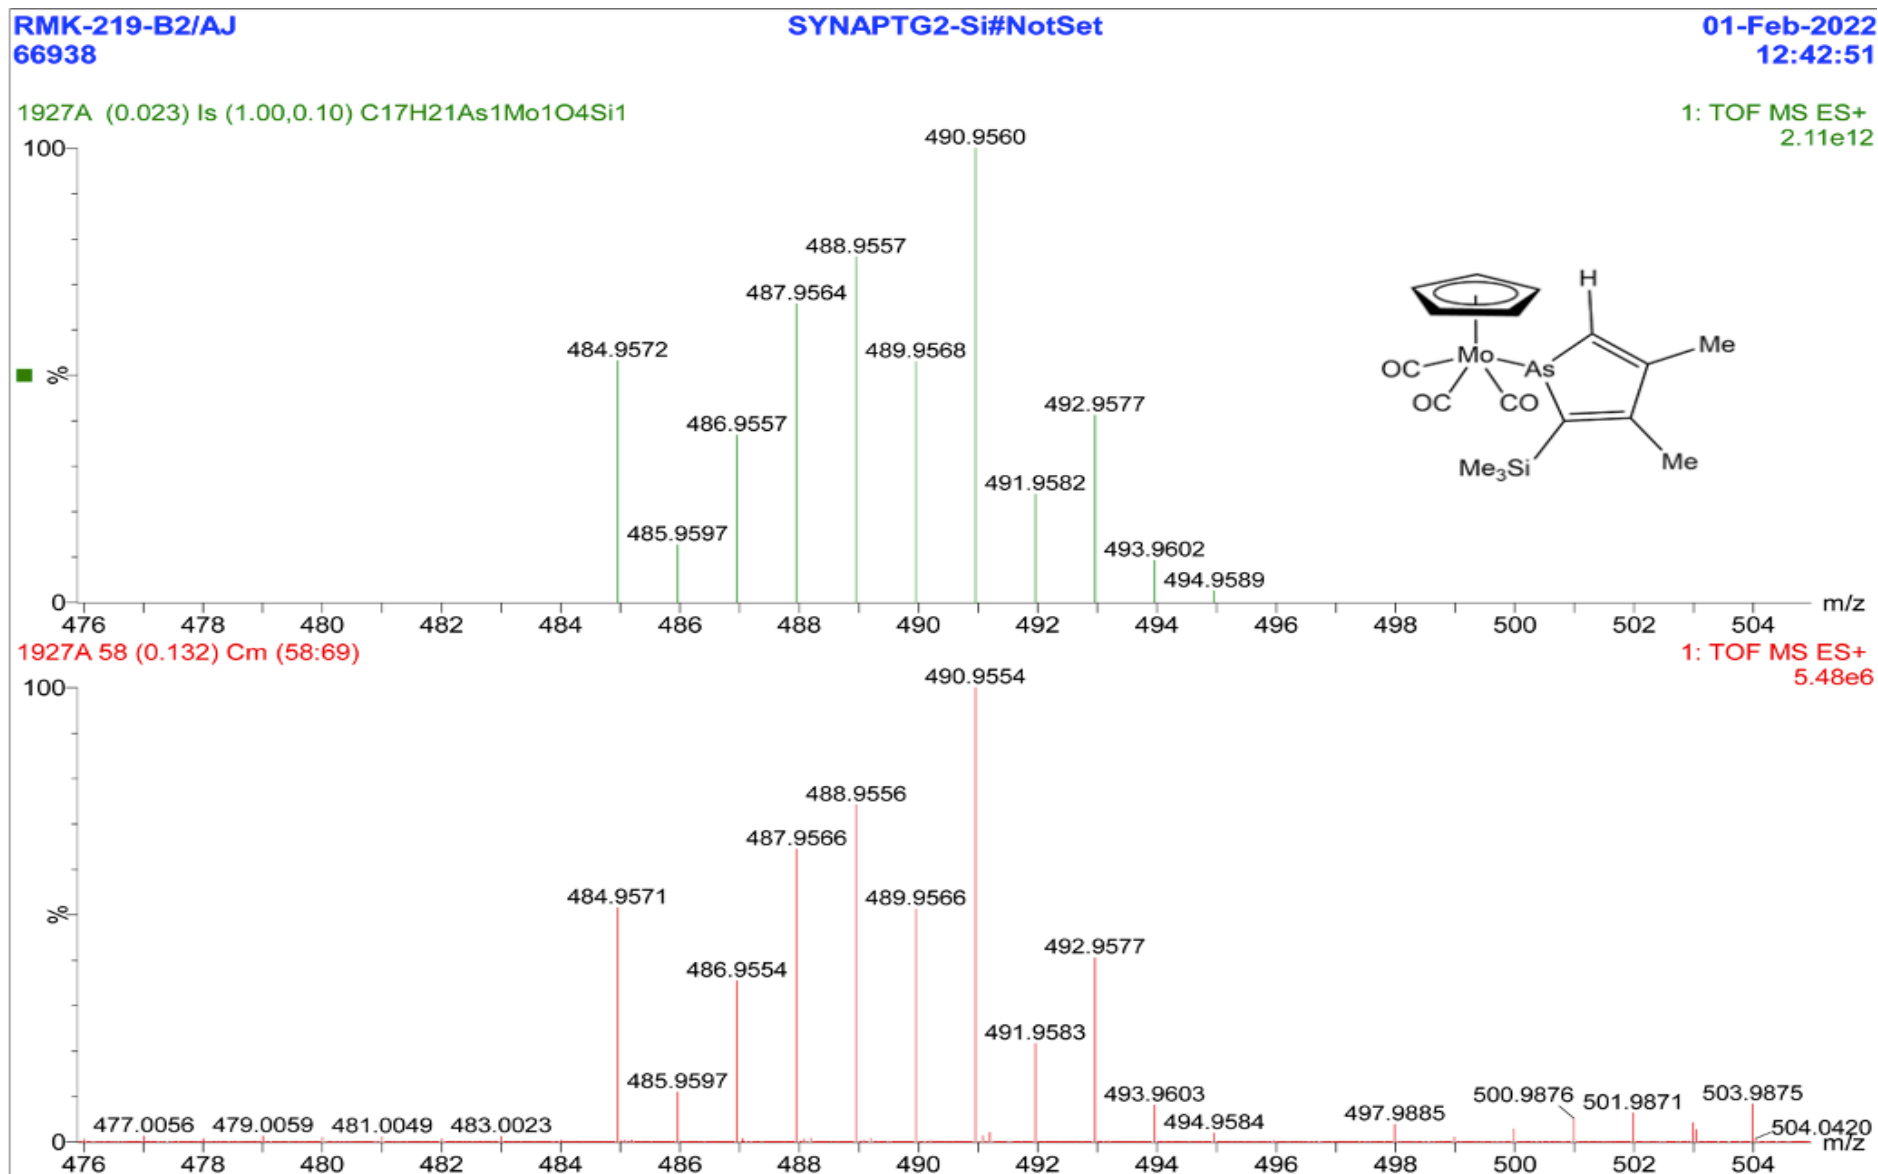

Figure S27. High Resolution Mass Spectrum (ESI-MS, MeCN) of  $[\text{Mo}(\text{AsC}_4\text{H}(\text{SiMe}_3)\text{Me}_2)(\text{CO})_3(\eta^5\text{-C}_5\text{H}_5)]$  (**2e**)

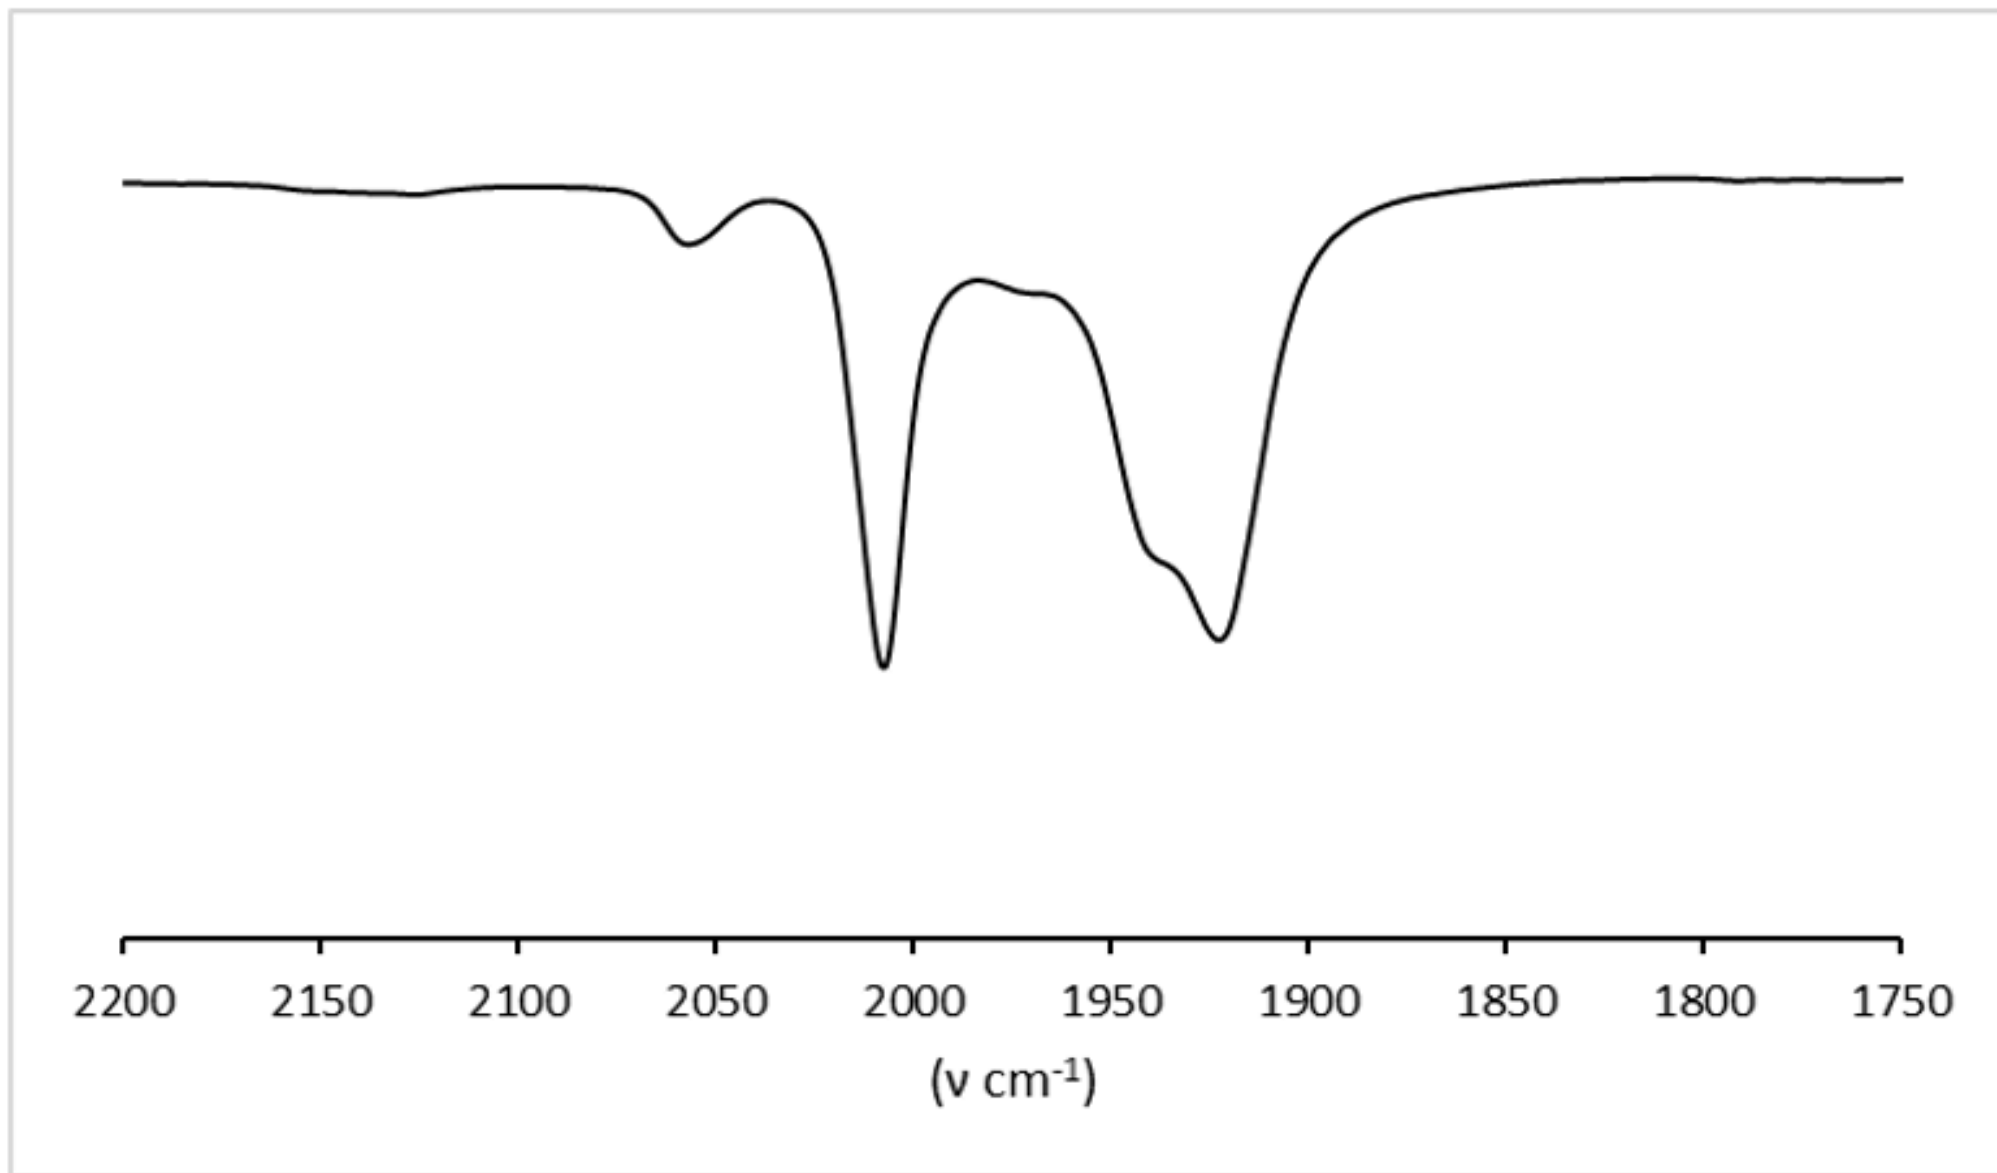

Figure S28. IR Spectrum ( $\text{CH}_2\text{Cl}_2$ , 295 K,  $\nu \text{ cm}^{-1}$ ) of  $[\text{Mo}\{(\text{AsC}_4\text{H}(\text{SiMe}_3)\text{Me}_2)(\text{CO})_3(\eta^5\text{-C}_5\text{H}_5)\}]$  (**2e**)

## Computational Results

1 ClAsC<sub>4</sub>H<sub>4</sub>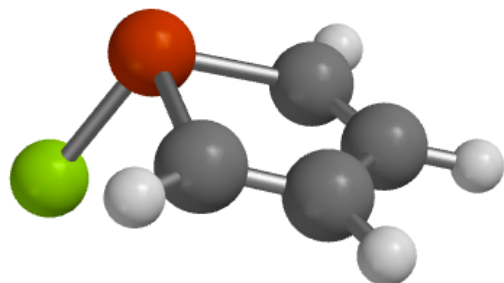

Figure S29. Optimised Geometry (wB97X-D/6-31G\*/Gas Phase)

## Thermodynamic Properties at 298.15 K

|                          |              |         |                                                |
|--------------------------|--------------|---------|------------------------------------------------|
| Zero Point Energy :      | 167.25       | kJ/mol  | (ZPE)                                          |
| Temperature Correction : | 18.06        | kJ/mol  | (vibration + gas law + rotation + translation) |
| Enthalpy Correction :    | 185.30       | kJ/mol  | (ZPE + temperature correction)                 |
| Enthalpy :               | -2850.524466 | au      | (Electronic Energy + Enthalpy Correction)      |
| Entropy :                | 333.02       | J/mol•K |                                                |
| Gibbs Energy :           | -2850.562283 | au      | (Enthalpy - T*Entropy)                         |
| C <sub>v</sub> :         | 94.85        | J/mol•K |                                                |

Lowest energy vibrational mode = 103 cm<sup>-1</sup>  
 Second lowest energy vibrational mode = 141 cm<sup>-1</sup>.

## Cartesian Coordinates

| Atom | x         | y         | z         |
|------|-----------|-----------|-----------|
| C    | -1.214422 | 0.410129  | 0.470971  |
| H    | -2.193693 | 0.610954  | 0.888618  |
| C    | -0.102814 | 0.182371  | 1.184290  |
| H    | -0.082448 | 0.162395  | 2.271260  |
| C    | 1.127707  | -0.065592 | 0.406025  |
| H    | 2.067300  | -0.275805 | 0.911072  |
| C    | 0.998766  | -0.026161 | -0.927506 |
| H    | 1.803474  | -0.183186 | -1.635672 |
| As   | -0.790084 | 0.554125  | -1.421325 |
| Cl   | -1.613785 | -1.369229 | -2.147734 |

2 (ClAsC<sub>4</sub>H<sub>4</sub>)<sub>2</sub> (As<sup>⋯</sup>As)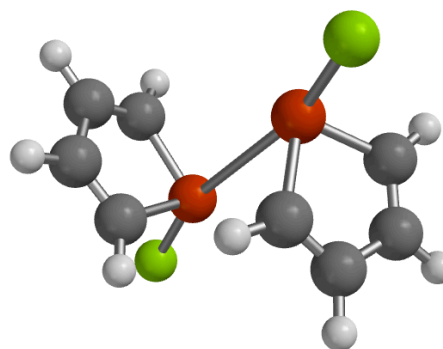

Figure S30. Optimised Geometry (wB97X-D/6-31G\*/Gas Phase)

## Thermodynamic Properties at 298.15 K

|                          |              |         |                                                |
|--------------------------|--------------|---------|------------------------------------------------|
| Zero Point Energy :      | 335.53       | kJ/mol  | (ZPE)                                          |
| Temperature Correction : | 33.66        | kJ/mol  | (vibration + gas law + rotation + translation) |
| Enthalpy Correction :    | 369.19       | kJ/mol  | (ZPE + temperature correction)                 |
| Enthalpy :               | -5701.057207 | au      | (Electronic Energy + Enthalpy Correction)      |
| Entropy :                | 456.44       | J/mol•K |                                                |
| Gibbs Energy :           | -5701.109040 | au      | (Enthalpy - T*Entropy)                         |
| C <sub>v</sub> :         | 214.58       | J/mol•K |                                                |

Lowest energy vibrational mode = 9 cm<sup>-1</sup>  
 Second lowest energy vibrational mode = 11 cm<sup>-1</sup>.

## Cartesian Coordinates

| Atom | x         | y         | z         |
|------|-----------|-----------|-----------|
| C    | 0.147606  | -1.207825 | 2.655079  |
| H    | -0.401921 | -1.002494 | 3.565766  |
| C    | 1.481564  | -1.163195 | 2.531536  |
| H    | 2.150925  | -0.928836 | 3.355488  |
| C    | 2.020317  | -1.464646 | 1.190990  |
| H    | 3.092887  | -1.460401 | 1.012888  |
| C    | 1.114949  | -1.748350 | 0.243859  |
| H    | 1.340844  | -1.985632 | -0.788593 |
| Cl   | -1.384265 | -3.547962 | 1.090448  |
| As   | -0.684452 | -1.453248 | 0.916248  |
| As   | -0.092777 | 1.872847  | -0.080926 |
| C    | -1.882203 | 2.113302  | -0.800230 |
| H    | -2.682449 | 2.618020  | -0.272611 |
| C    | 0.320606  | 0.994762  | -1.766366 |
| H    | 1.298267  | 0.603461  | -2.019902 |
| C    | -2.019892 | 1.440712  | -1.951315 |
| H    | -2.963749 | 1.354098  | -2.483740 |
| C    | -0.794405 | 0.819495  | -2.489432 |
| H    | -0.820626 | 0.267362  | -3.425778 |
| Cl   | 0.758773  | 3.878529  | -0.483409 |

3 (ClAsC<sub>4</sub>H<sub>4</sub>)<sub>2</sub> (Cycloaddition)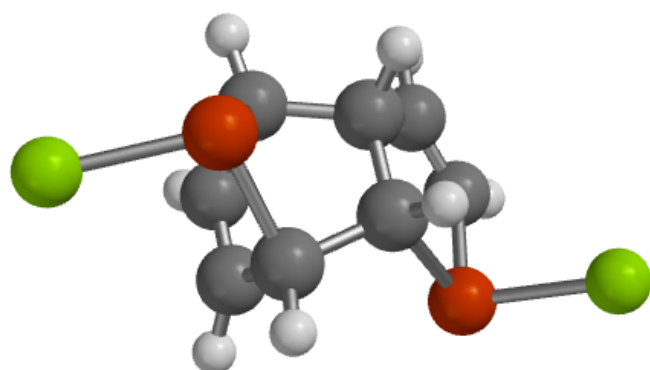

Figure S31. Optimised Geometry (wB97X-D/6-31G\*/Gas Phase)

## Thermodynamic Properties at 298.15 K

|                          |              |         |                                                |
|--------------------------|--------------|---------|------------------------------------------------|
| Zero Point Energy :      | 349.95       | kJ/mol  | (ZPE)                                          |
| Temperature Correction : | 30.68        | kJ/mol  | (vibration + gas law + rotation + translation) |
| Enthalpy Correction :    | 380.62       | kJ/mol  | (ZPE + temperature correction)                 |
| Enthalpy :               | -5701.109099 | au      | (Electronic Energy + Enthalpy Correction)      |
| Entropy :                | 434.97       | J/mol•K |                                                |
| Gibbs Energy :           | -5701.158494 | au      | (Enthalpy - T*Entropy)                         |
| C <sub>v</sub> :         | 194.27       | J/mol•K |                                                |

Lowest energy vibrational mode = 54 cm<sup>-1</sup>  
 Second lowest energy vibrational mode = 77 cm<sup>-1</sup>.

## Cartesian Coordinates

| Atom | x         | y         | z         |
|------|-----------|-----------|-----------|
| C    | 0.679893  | -1.597326 | -0.310837 |
| C    | 1.512302  | -0.916877 | 0.482351  |
| C    | 0.759713  | -0.087121 | 1.496517  |
| As   | -0.763156 | -1.272186 | 2.060219  |
| C    | -0.763742 | -1.355639 | 0.050911  |
| H    | 0.976422  | -2.209700 | -1.154765 |
| H    | 2.593297  | -0.899750 | 0.398115  |
| H    | 1.355925  | 0.343922  | 2.300217  |
| H    | -1.491632 | -2.028414 | -0.402808 |
| C    | -1.086685 | 0.163961  | -0.192079 |
| C    | -0.087800 | 0.960460  | 0.712094  |
| As   | 1.068223  | 2.083527  | -0.470627 |
| C    | 0.006675  | 1.460504  | -1.962597 |
| C    | -0.926875 | 0.569302  | -1.628639 |
| H    | -2.124858 | 0.354892  | 0.111351  |
| H    | -0.613249 | 1.639777  | 1.388470  |
| H    | 0.183177  | 1.789196  | -2.981634 |
| Cl   | 0.262223  | -3.145395 | 2.609937  |
| H    | -1.580165 | 0.106683  | -2.367879 |
| Cl   | 0.040312  | 4.040183  | -0.138317 |

4 (ClAsC<sub>4</sub>H<sub>4</sub>)<sub>2</sub> Cycloaddition Transition State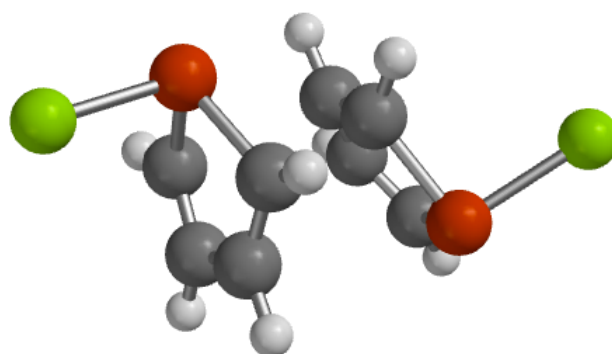

Figure S32. Transition State Geometry (wB97X-D/6-31G\*/Gas Phase)

## Thermodynamic Properties at 298.15 K

|                          |              |         |                                                |
|--------------------------|--------------|---------|------------------------------------------------|
| Zero Point Energy :      | 336.81       | kJ/mol  | (ZPE)                                          |
| Temperature Correction : | 33.23        | kJ/mol  | (vibration + gas law + rotation + translation) |
| Enthalpy Correction :    | 370.04       | kJ/mol  | (ZPE + temperature correction)                 |
| Enthalpy :               | -5701.032067 | au      | (Electronic Energy + Enthalpy Correction)      |
| Entropy :                | 453.33       | J/mol•K |                                                |
| Gibbs Energy :           | -5701.083547 | au      | (Enthalpy - T*Entropy)                         |
| C <sub>v</sub> :         | 202.66       | J/mol•K |                                                |

Imaginary vibrational mode = -471 cm<sup>-1</sup>.

## Cartesian Coordinates

| Atom | x         | y         | z         |
|------|-----------|-----------|-----------|
| C    | 0.496201  | -1.856201 | -0.140047 |
| C    | 1.539168  | -1.061021 | 0.388269  |
| C    | 1.143794  | -0.199430 | 1.406344  |
| As   | -0.530838 | -0.846554 | 2.208893  |
| C    | -0.719672 | -1.714936 | 0.483525  |
| H    | 0.642605  | -2.474208 | -1.020543 |
| H    | 2.551615  | -1.080515 | -0.005052 |
| H    | 1.861177  | 0.379495  | 1.981181  |
| H    | -1.614162 | -2.249416 | 0.187521  |
| C    | -1.225758 | 0.745760  | -0.040163 |
| C    | -0.043498 | 1.310913  | 0.450693  |
| As   | 1.145795  | 1.796500  | -1.052057 |
| C    | -0.269807 | 1.132902  | -2.201373 |
| C    | -1.303023 | 0.639916  | -1.494967 |
| H    | -2.147612 | 0.740437  | 0.534539  |
| H    | -0.062043 | 1.959038  | 1.321799  |
| H    | -0.234840 | 1.161882  | -3.285749 |
| Cl   | 0.331675  | -2.586241 | 3.335602  |
| H    | -2.194210 | 0.227909  | -1.965557 |
| Cl   | 0.633433  | 3.973771  | -1.092859 |

5 ClAsC<sub>4</sub>Me<sub>4</sub>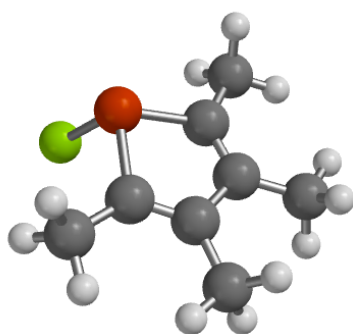Figure S33. Optimised Geometry ( $\omega$ B97X-D/6-31G\*/Gas Phase)

## Thermodynamic Properties at 298.15 K

|                          |              |         |                                                |
|--------------------------|--------------|---------|------------------------------------------------|
| Zero Point Energy :      | 447.19       | kJ/mol  | (ZPE)                                          |
| Temperature Correction : | 32.52        | kJ/mol  | (vibration + gas law + rotation + translation) |
| Enthalpy Correction :    | 479.71       | kJ/mol  | (ZPE + temperature correction)                 |
| Enthalpy :               | -3007.647586 | au      | (Electronic Energy + Enthalpy Correction)      |
| Entropy :                | 436.43       | J/mol•K |                                                |
| Gibbs Energy :           | -3007.697147 | au      | (Enthalpy - T*Entropy)                         |
| C <sub>v</sub> :         | 195.46       | J/mol•K |                                                |

Lowest energy vibrational mode = 67 cm<sup>-1</sup>  
 Second lowest energy vibrational mode = 80 cm<sup>-1</sup>.

## Cartesian Coordinates

| Atom | x         | y         | z         |
|------|-----------|-----------|-----------|
| C    | -0.357332 | -0.436614 | -0.643901 |
| C    | 0.746507  | 0.410401  | -0.085735 |
| C    | 0.487496  | 1.023812  | 1.084376  |
| As   | -1.372400 | 0.749429  | 1.573052  |
| C    | -1.485228 | -0.498365 | 0.089242  |
| Cl   | -1.094884 | -0.694004 | 3.243952  |
| C    | -2.742115 | -1.274360 | -0.162454 |
| H    | -2.650245 | -1.955521 | -1.013180 |
| H    | -3.591755 | -0.608922 | -0.357818 |
| H    | -3.001438 | -1.876792 | 0.716586  |
| C    | -0.134992 | -1.150875 | -1.949481 |
| H    | 0.723336  | -1.829735 | -1.888367 |
| H    | 0.077310  | -0.437313 | -2.754408 |
| H    | -1.004061 | -1.738583 | -2.249905 |
| C    | 2.045356  | 0.499689  | -0.840454 |
| H    | 2.765452  | 1.152587  | -0.344410 |
| H    | 1.886828  | 0.889564  | -1.852757 |
| H    | 2.507438  | -0.488751 | -0.946459 |
| C    | 1.375927  | 1.893039  | 1.920818  |
| H    | 2.405522  | 1.916446  | 1.552485  |
| H    | 1.403473  | 1.528510  | 2.954704  |
| H    | 1.009805  | 2.926358  | 1.954113  |

6 ClAsMe<sub>2</sub>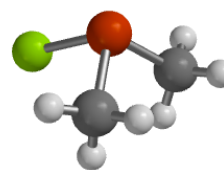Figure S34. Optimised Geometry ( $\omega$ B97X-D/6-31G\*/Gas Phase)

## Thermodynamic Properties at 298.15 K

|                          |              |         |                                                |
|--------------------------|--------------|---------|------------------------------------------------|
| Zero Point Energy :      | 189.27       | kJ/mol  | (ZPE)                                          |
| Temperature Correction : | 18.90        | kJ/mol  | (vibration + gas law + rotation + translation) |
| Enthalpy Correction :    | 208.18       | kJ/mol  | (ZPE + temperature correction)                 |
| Enthalpy :               | -2775.592285 | au      | (Electronic Energy + Enthalpy Correction)      |
| Entropy :                | 336.39       | J/mol•K |                                                |
| Gibbs Energy :           | -2775.630485 | au      | (Enthalpy - T*Entropy)                         |
| C <sub>v</sub> :         | 93.30        | J/mol•K |                                                |

Lowest energy vibrational mode = 156 cm<sup>-1</sup>  
 Second lowest energy vibrational mode = 174 cm<sup>-1</sup>.

## Cartesian Coordinates

| Atom | x         | y         | z         |
|------|-----------|-----------|-----------|
| As   | -0.932598 | 0.000000  | -0.712949 |
| C    | -0.049361 | 1.464467  | 0.257488  |
| H    | 1.029012  | 1.301345  | 0.319294  |
| H    | -0.471646 | 1.507142  | 1.267394  |
| H    | -0.248224 | 2.412030  | -0.247923 |
| C    | -0.049361 | -1.464467 | 0.257488  |
| H    | 1.029012  | -1.301345 | 0.319294  |
| H    | -0.248224 | -2.412030 | -0.247924 |
| H    | -0.471645 | -1.507143 | 1.267394  |
| Cl   | 0.413035  | -0.000000 | -2.479556 |

7 ClSnMe<sub>3</sub>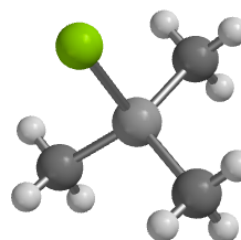Figure S35. Optimised Geometry ( $\omega$ B97X-D/6-31G\*/LANL2DZ(Sn)/Gas Phase)



## Thermodynamic Properties at 298.15 K

|                          |             |         |                                                |
|--------------------------|-------------|---------|------------------------------------------------|
| Zero Point Energy :      | 274.84      | kJ/mol  | (ZPE)                                          |
| Temperature Correction : | 24.45       | kJ/mol  | (vibration + gas law + rotation + translation) |
| Enthalpy Correction :    | 299.29      | kJ/mol  | (ZPE + temperature correction)                 |
| Enthalpy :               | -583.201444 | au      | (Electronic Energy + Enthalpy Correction)      |
| Entropy :                | 381.17      | J/mol•K |                                                |
| Gibbs Energy :           | -583.244729 | au      | (Enthalpy - T*Entropy)                         |
| $C_v$ :                  | 136.59      | J/mol•K |                                                |

Lowest energy vibrational mode = 67  $\text{cm}^{-1}$   
 Second lowest energy vibrational mode = 73  $\text{cm}^{-1}$ .

## Cartesian Coordinates

| Atom | x         | y         | z         |
|------|-----------|-----------|-----------|
| Sn   | 0.000126  | 0.000000  | -0.371213 |
| C    | -2.055428 | -0.000000 | 0.188221  |
| H    | -2.555778 | 0.886846  | -0.209595 |
| H    | -2.158908 | 0.000002  | 1.278015  |
| H    | -2.555777 | -0.886848 | -0.209592 |
| C    | 1.028080  | 1.780599  | 0.185786  |
| H    | 0.513580  | 2.656616  | -0.217879 |
| H    | 2.048349  | 1.767516  | -0.206650 |
| H    | 1.074429  | 1.874226  | 1.275479  |
| C    | 1.028080  | -1.780599 | 0.185785  |
| H    | 2.048348  | -1.767517 | -0.206652 |
| H    | 0.513579  | -2.656616 | -0.217878 |
| H    | 1.074431  | -1.874225 | 1.275478  |
| Cl   | -0.003110 | 0.000001  | -2.749304 |

8  $[\text{Cr}(\text{SnMe}_3)(\text{CO})_3(\eta^5\text{-C}_5\text{H}_5)]$ 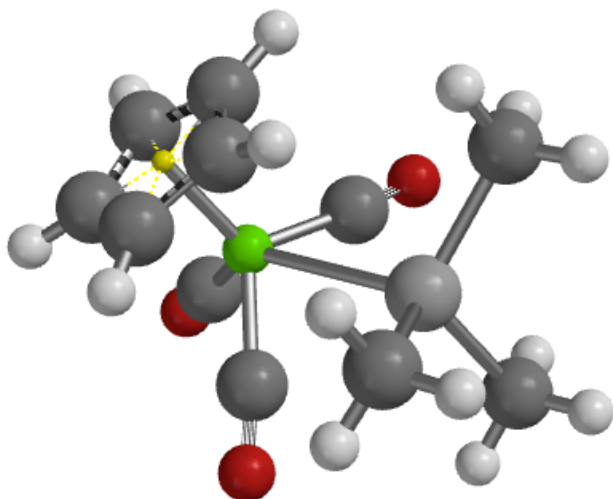

Figure S36. Optimised Geometry ( $\omega$ B97X-D/6-31G\*/LANL2DZ(Sn)/Gas Phase)

## Thermodynamic Properties at 298.15 K

|                          |              |         |                                                |
|--------------------------|--------------|---------|------------------------------------------------|
| Zero Point Energy :      | 554.83       | kJ/mol  | (ZPE)                                          |
| Temperature Correction : | 46.37        | kJ/mol  | (vibration + gas law + rotation + translation) |
| Enthalpy Correction :    | 601.20       | kJ/mol  | (ZPE + temperature correction)                 |
| Enthalpy :               | -1700.667694 | au      | (Electronic Energy + Enthalpy Correction)      |
| Entropy :                | 535.52       | J/mol•K |                                                |
| Gibbs Energy :           | -1700.728508 | au      | (Enthalpy - T*Entropy)                         |
| $C_v$ :                  | 312.02       | J/mol•K |                                                |

Lowest energy vibrational mode = 28  $\text{cm}^{-1}$   
 Second lowest energy vibrational mode = 60  $\text{cm}^{-1}$ .

## Cartesian Coordinates

| Atom | x         | y         | z         |
|------|-----------|-----------|-----------|
| Cr   | -0.272743 | -0.000014 | 1.255699  |
| C    | -1.538776 | 0.000060  | 2.581570  |
| O    | -2.310636 | 0.000101  | 3.439096  |
| C    | -1.158116 | -1.512193 | 0.724946  |
| O    | -1.681719 | -2.516742 | 0.478606  |
| C    | -1.158379 | 1.512161  | 0.724641  |
| O    | -1.682157 | 2.516676  | 0.478105  |
| Sn   | -0.488979 | -0.000017 | -1.488995 |
| C    | 0.511049  | 1.752513  | -2.235553 |
| H    | 1.572035  | 1.756434  | -1.967894 |
| H    | 0.050349  | 2.655662  | -1.825983 |
| H    | 0.438795  | 1.797928  | -3.326633 |
| C    | 0.510921  | -1.752629 | -2.235535 |
| H    | 0.049911  | -2.655731 | -1.826367 |
| H    | 1.571741  | -1.756839 | -1.967477 |
| H    | 0.439104  | -1.797831 | -3.326591 |
| C    | -2.528265 | 0.000055  | -2.144562 |
| H    | -3.047795 | -0.887495 | -1.771975 |
| H    | -2.587433 | 0.000130  | -3.237385 |
| H    | -3.047787 | 0.887563  | -1.771843 |
| H    | 1.691111  | -2.175670 | 1.081718  |
| C    | 1.586597  | -1.149400 | 1.406285  |
| C    | 1.186191  | -0.712955 | 2.692541  |
| H    | 2.242253  | 0.000175  | -0.393088 |
| H    | 0.933351  | -1.349098 | 3.529477  |
| C    | 1.186138  | 0.712849  | 2.692642  |
| H    | 0.933251  | 1.348856  | 3.529670  |
| C    | 1.586507  | 1.149501  | 1.406447  |
| H    | 1.690932  | 2.175836  | 1.082046  |
| C    | 1.839815  | 0.000115  | 0.610604  |

9  $[\text{Mo}(\text{SnMe}_3)(\text{CO})_3(\eta^5\text{-C}_5\text{H}_5)]$ 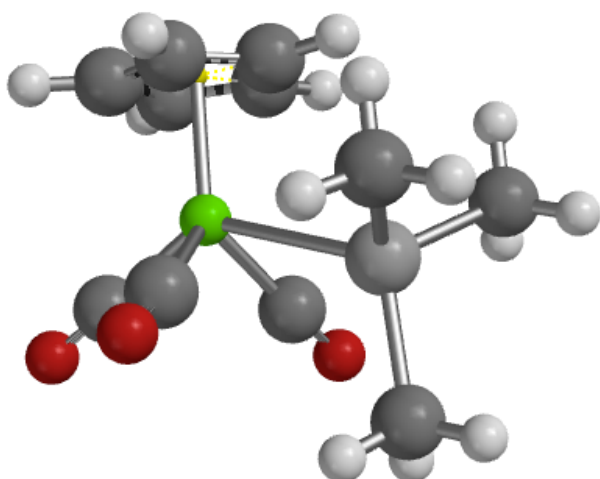Figure S37. Optimised Geometry ( $\omega\text{B97X-D/6-31G}^*/\text{LANL2DZ}(\text{Sn})/\text{Gas Phase}$ )

## Thermodynamic Properties at 298.15 K

|                          |             |         |                                                |
|--------------------------|-------------|---------|------------------------------------------------|
| Zero Point Energy :      | 549.63      | kJ/mol  | (ZPE)                                          |
| Temperature Correction : | 47.42       | kJ/mol  | (vibration + gas law + rotation + translation) |
| Enthalpy Correction :    | 597.06      | kJ/mol  | (ZPE + temperature correction)                 |
| Enthalpy :               | -723.831153 | au      | (Electronic Energy + Enthalpy Correction)      |
| Entropy :                | 544.12      | J/mol•K |                                                |
| Gibbs Energy :           | -723.892943 | au      | (Enthalpy - T*Entropy)                         |
| $C_v$ :                  | 318.00      | J/mol•K |                                                |

Lowest energy vibrational mode = 32  $\text{cm}^{-1}$ Second lowest energy vibrational mode = 56  $\text{cm}^{-1}$ .

## Cartesian Coordinates

| Atom | x         | y         | z         |
|------|-----------|-----------|-----------|
| Mo   | -0.282954 | 0.000380  | 1.316435  |
| C    | -1.642859 | -0.000607 | 2.776956  |
| O    | -2.409169 | -0.001090 | 3.636962  |
| C    | -1.341065 | -1.578753 | 0.754040  |
| O    | -1.909444 | -2.549658 | 0.477357  |
| C    | -1.342100 | 1.579274  | 0.757658  |
| O    | -1.911161 | 2.550120  | 0.482460  |
| Sn   | -0.567954 | -0.000275 | -1.531915 |
| C    | 0.416574  | 1.759935  | -2.284121 |
| H    | 1.478225  | 1.770442  | -2.017132 |
| H    | -0.050922 | 2.656876  | -1.866783 |
| H    | 0.339368  | 1.809307  | -3.375447 |
| C    | 0.415332  | -1.761419 | -2.283534 |
| H    | -0.052719 | -2.657942 | -1.865919 |
| H    | 1.476988  | -1.772408 | -2.016537 |
| H    | 0.338089  | -1.811142 | -3.374885 |
| C    | -2.612423 | 0.000401  | -2.176936 |
| H    | -3.130232 | -0.886418 | -1.800153 |
| H    | -2.677213 | 0.000219  | -3.269843 |
| H    | -3.129439 | 0.887804  | -1.800452 |
| H    | 1.873930  | -2.179074 | 1.080895  |
| C    | 1.783452  | -1.151897 | 1.407129  |
| C    | 1.456799  | -0.715615 | 2.715590  |
| H    | 2.313265  | 0.000377  | -0.435933 |
| H    | 1.268429  | -1.352886 | 3.568526  |
| C    | 1.456637  | 0.716627  | 2.715567  |
| H    | 1.268054  | 1.353674  | 3.568620  |
| C    | 1.783145  | 1.153004  | 1.407087  |
| H    | 1.873311  | 2.180181  | 1.080736  |
| C    | 1.981619  | 0.000563  | 0.593252  |

10  $[\text{W}(\text{SnMe}_3)(\text{CO})_3(\eta^5\text{-C}_5\text{H}_5)]$ 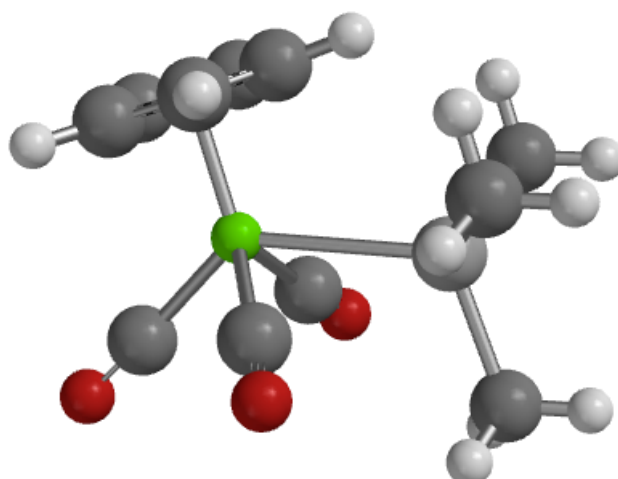Figure S38. Optimised Geometry ( $\omega\text{B97X-D/6-31G}^*/\text{LANL2DZ}(\text{Sn})/\text{Gas Phase}$ )

## Thermodynamic Properties at 298.15 K

|                          |             |         |                                                |
|--------------------------|-------------|---------|------------------------------------------------|
| Zero Point Energy :      | 550.53      | kJ/mol  | (ZPE)                                          |
| Temperature Correction : | 47.16       | kJ/mol  | (vibration + gas law + rotation + translation) |
| Enthalpy Correction :    | 597.69      | kJ/mol  | (ZPE + temperature correction)                 |
| Enthalpy :               | -724.129041 | au      | (Electronic Energy + Enthalpy Correction)      |
| Entropy :                | 545.37      | J/mol•K |                                                |
| Gibbs Energy :           | -724.190972 | au      | (Enthalpy - T*Entropy)                         |
| C <sub>v</sub> :         | 316.94      | J/mol•K |                                                |

Lowest energy vibrational mode = 39 cm<sup>-1</sup>

Second lowest energy vibrational mode = 57 cm<sup>-1</sup>.

## Cartesian Coordinates

| Atom | x         | y         | z         |
|------|-----------|-----------|-----------|
| W    | -0.207096 | -0.000398 | 1.327863  |
| C    | -1.509122 | 0.002826  | 2.829148  |
| O    | -2.241269 | 0.004321  | 3.722088  |
| C    | -1.280972 | -1.582580 | 0.825033  |
| O    | -1.857709 | -2.555817 | 0.563059  |
| C    | -1.280490 | 1.582572  | 0.826715  |
| O    | -1.856079 | 2.556293  | 0.565732  |
| Sn   | -0.649096 | 0.000008  | -1.506005 |
| C    | 0.298271  | 1.756691  | -2.318752 |
| H    | 1.372232  | 1.767042  | -2.106501 |
| H    | -0.145359 | 2.657277  | -1.883951 |
| H    | 0.166990  | 1.800441  | -3.404822 |
| C    | 0.299583  | -1.756073 | -2.318664 |
| H    | -0.143224 | -2.656937 | -1.883736 |
| H    | 1.373547  | -1.765665 | -2.106647 |
| H    | 0.168171  | -1.800037 | -3.404620 |
| C    | -2.725804 | -0.001057 | -2.035403 |
| H    | -3.218911 | -0.888514 | -1.628101 |
| H    | -2.855271 | -0.000922 | -3.122443 |
| H    | -3.220008 | 0.885617  | -1.627721 |
| H    | 1.931158  | -2.180055 | 1.002378  |
| C    | 1.854537  | -1.153449 | 1.333106  |
| C    | 1.574934  | -0.717276 | 2.655898  |
| H    | 2.306437  | 0.000346  | -0.529443 |
| H    | 1.418825  | -1.353032 | 3.516128  |
| C    | 1.575183  | 0.715595  | 2.656309  |
| H    | 1.419308  | 1.350939  | 3.516883  |
| C    | 1.854851  | 1.152583  | 1.333810  |
| H    | 1.931589  | 2.179446  | 1.003868  |
| C    | 2.025375  | -0.000185 | 0.514495  |

11 [Fe(SnMe<sub>3</sub>)(CO)<sub>2</sub>(η<sup>5</sup>-C<sub>5</sub>H<sub>5</sub>)]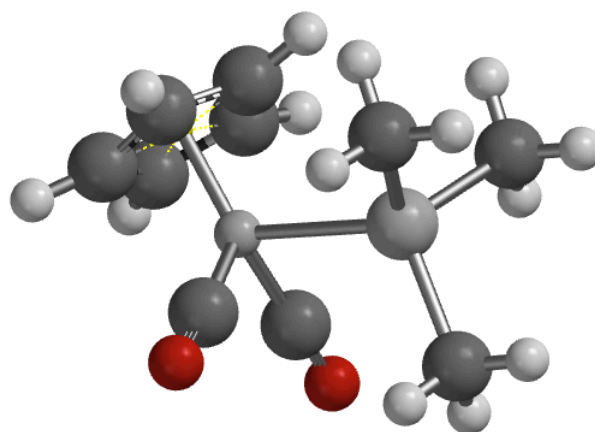

Figure S39. Optimised Geometry (ωB97X-D/6-31G\*/LANL2DZ(Sn)/Gas Phase)

## Thermodynamic Properties at 298.15 K

|                          |              |         |                                                |
|--------------------------|--------------|---------|------------------------------------------------|
| Zero Point Energy :      | 531.54       | kJ/mol  | (ZPE)                                          |
| Temperature Correction : | 42.05        | kJ/mol  | (vibration + gas law + rotation + translation) |
| Enthalpy Correction :    | 573.59       | kJ/mol  | (ZPE + temperature correction)                 |
| Enthalpy :               | -1806.577079 | au      | (Electronic Energy + Enthalpy Correction)      |
| Entropy :                | 506.41       | J/mol•K |                                                |
| Gibbs Energy :           | -1806.634587 | au      | (Enthalpy - T*Entropy)                         |
| C <sub>v</sub> :         | 280.93       | J/mol•K |                                                |

Lowest energy vibrational mode = 26 cm<sup>-1</sup>

Second lowest energy vibrational mode = 49 cm<sup>-1</sup>.

## Cartesian Coordinates

| Atom | x         | y         | z         |
|------|-----------|-----------|-----------|
| Fe   | -0.375640 | -0.000326 | 1.193390  |
| C    | -1.538268 | -1.280760 | 1.010304  |
| O    | -2.280812 | -2.161528 | 0.937643  |
| C    | -1.538693 | 1.281143  | 1.009627  |
| O    | -2.281028 | 2.162076  | 0.936593  |
| Sn   | -0.330006 | -0.000030 | -1.367172 |
| C    | 0.719426  | 1.753017  | -2.053814 |
| H    | 1.750568  | 1.771981  | -1.685314 |
| H    | 0.217036  | 2.658781  | -1.699055 |
| H    | 0.751708  | 1.789699  | -3.147589 |
| C    | 0.719450  | -1.752925 | -2.054168 |
| H    | 0.217062  | -2.658774 | -1.699624 |
| H    | 1.750584  | -1.771961 | -1.685649 |
| H    | 0.751755  | -1.789365 | -3.147950 |
| C    | -2.297198 | 0.000038  | -2.233433 |
| H    | -2.857288 | -0.886030 | -1.918384 |
| H    | -2.246405 | 0.000163  | -3.326938 |
| H    | -2.857305 | 0.886022  | -1.918179 |
| H    | 1.424682  | -2.177273 | 1.461057  |
| C    | 1.251108  | -1.149433 | 1.747792  |
| C    | 0.541281  | -0.706455 | 2.908067  |
| H    | 2.311441  | -0.000273 | 0.150954  |
| H    | 0.075854  | -1.343198 | 3.647717  |
| C    | 0.541046  | 0.706374  | 2.907795  |
| H    | 0.075381  | 1.343222  | 3.647204  |
| C    | 1.250774  | 1.149120  | 1.747339  |
| H    | 1.424036  | 2.176896  | 1.460184  |
| C    | 1.703245  | -0.000202 | 1.045462  |

12  $[\text{Ru}(\text{SnMe}_3)(\text{CO})_2(\eta^5\text{-C}_5\text{H}_5)]$ 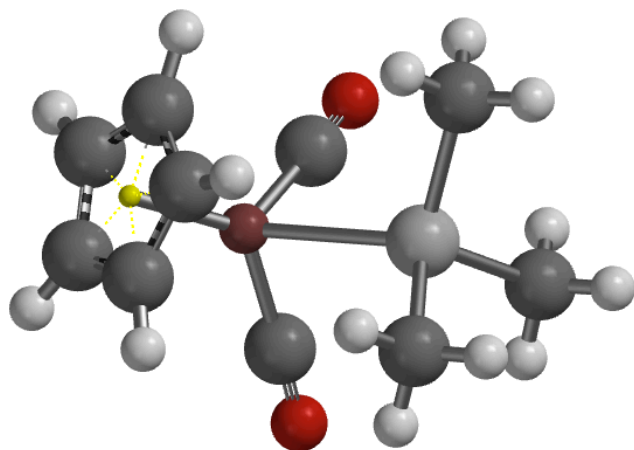Figure S40. Optimised Geometry ( $\omega$ B97X-D/6-31G\*/LANL2DZ(Sn)/Gas Phase)

## Thermodynamic Properties at 298.15 K

|                          |             |         |                                                |
|--------------------------|-------------|---------|------------------------------------------------|
| Zero Point Energy :      | 528.46      | kJ/mol  | (ZPE)                                          |
| Temperature Correction : | 42.78       | kJ/mol  | (vibration + gas law + rotation + translation) |
| Enthalpy Correction :    | 571.24      | kJ/mol  | (ZPE + temperature correction)                 |
| Enthalpy :               | -636.905428 | au      | (Electronic Energy + Enthalpy Correction)      |
| Entropy :                | 513.69      | J/mol•K |                                                |
| Gibbs Energy :           | -636.963762 | au      | (Enthalpy - T*Entropy)                         |
| $C_v$ :                  | 284.76      | J/mol•K |                                                |

Lowest energy vibrational mode = 22  $\text{cm}^{-1}$ Second lowest energy vibrational mode = 42  $\text{cm}^{-1}$ .

## Cartesian Coordinates

| Atom | x         | y         | z         |
|------|-----------|-----------|-----------|
| Ru   | -0.446528 | -0.051369 | 1.223490  |
| C    | -1.607756 | -1.526097 | 1.068400  |
| O    | -2.303769 | -2.444176 | 1.006808  |
| C    | -1.877219 | 1.158033  | 1.064567  |
| O    | -2.731208 | 1.930252  | 0.986815  |
| Sn   | -0.427423 | -0.039500 | -1.437271 |
| C    | 0.336201  | 1.856765  | -2.121800 |
| H    | 1.345270  | 2.035656  | -1.736082 |
| H    | -0.307751 | 2.670877  | -1.774305 |
| H    | 0.377671  | 1.895926  | -3.215436 |
| C    | 0.881453  | -1.604282 | -2.133908 |
| H    | 0.513979  | -2.580779 | -1.802691 |
| H    | 1.894615  | -1.472833 | -1.740051 |
| H    | 0.940322  | -1.613319 | -3.227418 |
| C    | -2.380253 | -0.342102 | -2.287205 |
| H    | -2.792244 | -1.306080 | -1.972775 |
| H    | -2.341579 | -0.326174 | -3.381316 |
| H    | -3.067212 | 0.443881  | -1.957812 |
| H    | 1.895275  | -1.938562 | 1.369994  |
| C    | 1.582132  | -0.963957 | 1.717398  |
| C    | 0.926483  | -0.680994 | 2.960662  |
| H    | 2.345087  | 0.405642  | 0.119756  |
| H    | 0.628223  | -1.412960 | 3.698451  |
| C    | 0.727781  | 0.715637  | 3.046278  |
| H    | 0.254143  | 1.243506  | 3.862162  |
| C    | 1.259829  | 1.310356  | 1.853720  |
| H    | 1.283075  | 2.367059  | 1.626257  |
| C    | 1.819865  | 0.274642  | 1.055771  |

13  $[\text{Os}(\text{SnMe}_3)(\text{CO})_2(\eta^5\text{-C}_5\text{H}_5)]$ 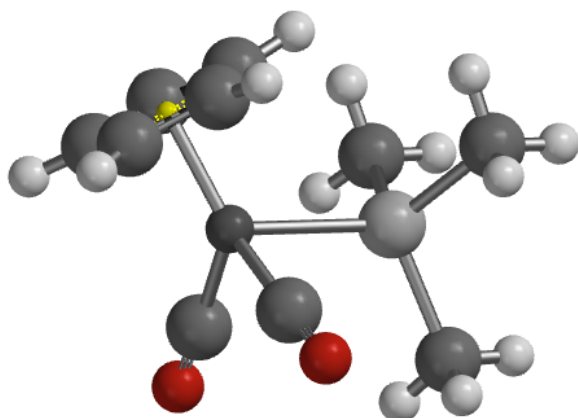Figure S41. Optimised Geometry ( $\omega$ B97X-D/6-31G\*/LANL2DZ(Sn)/Gas Phase)

## Thermodynamic Properties at 298.15 K

|                          |             |         |                                                |
|--------------------------|-------------|---------|------------------------------------------------|
| Zero Point Energy :      | 529.36      | kJ/mol  | (ZPE)                                          |
| Temperature Correction : | 42.54       | kJ/mol  | (vibration + gas law + rotation + translation) |
| Enthalpy Correction :    | 571.89      | kJ/mol  | (ZPE + temperature correction)                 |
| Enthalpy :               | -634.085987 | au      | (Electronic Energy + Enthalpy Correction)      |
| Entropy :                | 515.77      | J/mol•K |                                                |
| Gibbs Energy :           | -634.144557 | au      | (Enthalpy - T*Entropy)                         |
| $C_v$ :                  | 283.24      | J/mol•K |                                                |

Lowest energy vibrational mode = 17  $\text{cm}^{-1}$ Second lowest energy vibrational mode = 31  $\text{cm}^{-1}$ .

## Cartesian Coordinates

| Atom | x         | y         | z         |
|------|-----------|-----------|-----------|
| Os   | -0.383764 | 0.012006  | 1.258763  |
| C    | -1.683186 | -1.342028 | 1.203385  |
| O    | -2.456913 | -2.203463 | 1.182041  |
| C    | -1.707427 | 1.337000  | 1.161628  |
| O    | -2.502290 | 2.178451  | 1.120733  |
| Sn   | -0.506497 | -0.032301 | -1.423056 |
| C    | 0.580515  | 1.666230  | -2.190744 |
| H    | 1.631695  | 1.633492  | -1.883103 |
| H    | 0.146926  | 2.596492  | -1.809836 |
| H    | 0.550436  | 1.698232  | -3.284941 |
| C    | 0.435356  | -1.818207 | -2.183115 |
| H    | -0.064159 | -2.709610 | -1.790571 |
| H    | 1.490345  | -1.866068 | -1.891663 |
| H    | 0.384833  | -1.852068 | -3.276560 |
| C    | -2.520959 | 0.037784  | -2.171566 |
| H    | -3.088782 | -0.832305 | -1.826998 |
| H    | -2.536412 | 0.044264  | -3.266382 |
| H    | -3.032154 | 0.938036  | -1.816387 |
| H    | 1.582173  | -2.214688 | 1.782035  |
| C    | 1.479461  | -1.147517 | 1.916723  |
| C    | 0.936153  | -0.491223 | 3.073016  |
| H    | 2.374509  | -0.316463 | 0.041035  |
| H    | 0.550958  | -0.979556 | 3.956446  |
| C    | 1.006318  | 0.910340  | 2.851034  |
| H    | 0.673250  | 1.675067  | 3.538572  |
| C    | 1.587453  | 1.131575  | 1.558202  |
| H    | 1.795304  | 2.091634  | 1.108505  |
| C    | 1.894275  | -0.145175 | 0.994369  |

14  $[\text{Mo}(\text{AsMe}_2)(\text{CO})_3(\eta^5\text{-C}_5\text{H}_5)]$ 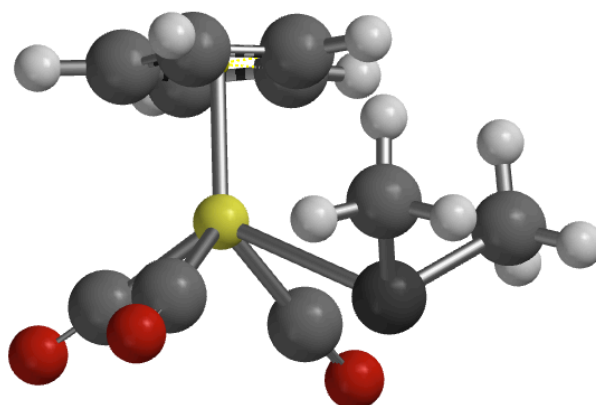Figure S42. Optimised Geometry ( $\omega$ B97X-D/6-31G\*/LANL2DZ(Sn)/Gas Phase)

## Thermodynamic Properties at 298.15 K

|                          |              |         |                                                |
|--------------------------|--------------|---------|------------------------------------------------|
| Zero Point Energy :      | 464.59       | kJ/mol  | (ZPE)                                          |
| Temperature Correction : | 42.02        | kJ/mol  | (vibration + gas law + rotation + translation) |
| Enthalpy Correction :    | 506.61       | kJ/mol  | (ZPE + temperature correction)                 |
| Enthalpy :               | -2916.218991 | au      | (Electronic Energy + Enthalpy Correction)      |
| Entropy :                | 506.70       | J/mol•K |                                                |
| Gibbs Energy :           | -2916.276531 | au      | (Enthalpy - T*Entropy)                         |
| $C_v$ :                  | 275.14       | J/mol•K |                                                |

Lowest energy vibrational mode = 26  $\text{cm}^{-1}$

Second lowest energy vibrational mode = 66  $\text{cm}^{-1}$ .

## Cartesian Coordinates

| Atom | x         | y         | z         |
|------|-----------|-----------|-----------|
| Mo   | 0.591734  | 0.923651  | -0.047227 |
| H    | -0.593538 | 2.817329  | 2.018511  |
| C    | -0.926000 | 2.054383  | 1.328051  |
| C    | -1.073993 | 0.672915  | 1.623890  |
| H    | -1.356945 | 3.208079  | -0.545231 |
| H    | -0.863139 | 0.196913  | 2.571766  |
| C    | -1.568391 | 0.027850  | 0.459572  |
| H    | -1.806818 | -1.021913 | 0.374459  |
| C    | -1.726299 | 1.002687  | -0.560291 |
| H    | -2.096739 | 0.818865  | -1.559487 |
| C    | -1.330404 | 2.258721  | -0.028181 |
| C    | 1.770329  | 2.526992  | -0.162746 |
| O    | 2.429077  | 3.470154  | -0.220330 |
| C    | 1.190832  | 0.779742  | -1.940250 |
| O    | 1.473714  | 0.721347  | -3.057710 |
| C    | 2.098632  | 0.335942  | 1.112865  |
| O    | 2.930238  | 0.010855  | 1.844172  |
| As   | 1.311521  | -1.696554 | -0.634217 |
| C    | 0.665480  | -2.628472 | 0.993895  |
| H    | 1.286634  | -2.338078 | 1.845124  |
| H    | 0.792248  | -3.703632 | 0.829157  |
| H    | -0.382412 | -2.433146 | 1.232945  |
| C    | -0.176791 | -2.233396 | -1.830527 |
| H    | -0.091132 | -1.692106 | -2.776190 |
| H    | -1.171161 | -2.065131 | -1.410615 |
| H    | -0.061572 | -3.302689 | -2.037112 |

15 [Mo{As(CHCH<sub>2</sub>)<sub>2</sub>}(CO)<sub>3</sub>( $\eta^5$ -C<sub>5</sub>H<sub>5</sub>)]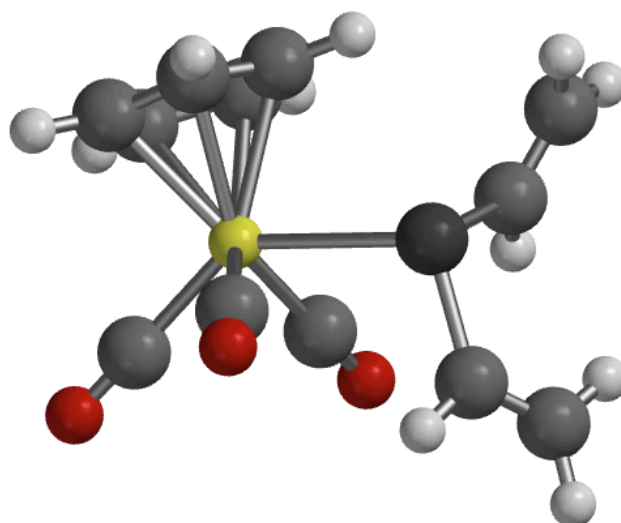

Figure S43. Optimised Geometry ( $\omega$ B97X-D/6-31G\*/LANL2DZ(Sn)/Gas Phase)

## Cartesian Coordinates

| Atom | x         | y         | z         |
|------|-----------|-----------|-----------|
| Mo   | 1.117263  | -0.339540 | -0.542466 |
| As   | -0.835660 | -0.508115 | 1.392242  |
| C    | -3.314748 | 0.545850  | 0.384700  |
| C    | -0.080931 | 0.436396  | 2.913069  |
| O    | 0.748534  | 2.596625  | 0.523169  |
| C    | -2.083453 | 0.864911  | 0.785801  |
| C    | 0.882789  | 1.501105  | 0.187562  |
| C    | -0.277244 | -0.018595 | -2.440435 |
| H    | -0.839366 | 0.893527  | -2.586851 |
| C    | 0.284815  | -2.162361 | -1.802551 |
| H    | 0.216202  | -3.163486 | -1.399633 |
| O    | 2.247235  | -2.128023 | 1.779910  |
| C    | -0.745325 | -1.183077 | -1.773028 |
| H    | -1.726180 | -1.301406 | -1.333752 |
| C    | 1.839214  | -1.440677 | 0.947005  |
| O    | 4.106388  | 0.648800  | -0.600061 |
| C    | 1.397777  | -1.603643 | -2.486225 |
| H    | 2.328730  | -2.108201 | -2.705817 |
| C    | -0.635486 | 1.474835  | 3.537720  |
| C    | 3.012243  | 0.291058  | -0.565209 |
| C    | 1.046238  | -0.273429 | -2.883162 |
| H    | 1.665799  | 0.403447  | -3.455656 |
| H    | -1.762542 | 1.906389  | 0.767706  |
| H    | -4.016324 | 1.297821  | 0.029025  |
| H    | -0.177058 | 1.912510  | 4.421653  |
| H    | 0.847427  | 0.011569  | 3.293945  |
| H    | -3.679304 | -0.480310 | 0.406098  |
| H    | -1.567033 | 1.926021  | 3.205245  |

## Thermodynamic Properties at 298.15 K

|                          |              |         |                                                |
|--------------------------|--------------|---------|------------------------------------------------|
| Zero Point Energy :      | 492.13       | kJ/mol  | (ZPE)                                          |
| Temperature Correction : | 44.93        | kJ/mol  | (vibration + gas law + rotation + translation) |
| Enthalpy Correction :    | 537.06       | kJ/mol  | (ZPE + temperature correction)                 |
| Enthalpy :               | -2992.334863 | au      | (Electronic Energy + Enthalpy Correction)      |
| Entropy :                | 524.69       | J/mol•K |                                                |
| Gibbs Energy :           | -2992.394446 | au      | (Enthalpy - T*Entropy)                         |
| $C_v$ :                  | 298.81       | J/mol•K |                                                |

Lowest energy vibrational mode = 42 cm<sup>-1</sup>  
 Second lowest energy vibrational mode = 52 cm<sup>-1</sup>.

## Thermodynamic Properties at 298.15 K

|                          |              |         |                                                |
|--------------------------|--------------|---------|------------------------------------------------|
| Zero Point Energy :      | 442.23       | kJ/mol  | (ZPE)                                          |
| Temperature Correction : | 41.12        | kJ/mol  | (vibration + gas law + rotation + translation) |
| Enthalpy Correction :    | 483.36       | kJ/mol  | (ZPE + temperature correction)                 |
| Enthalpy :               | -2991.170688 | au      | (Electronic Energy + Enthalpy Correction)      |
| Entropy :                | 498.53       | J/mol•K |                                                |
| Gibbs Energy :           | -2991.227301 | au      | (Enthalpy - T*Entropy)                         |
| $C_v$ :                  | 276.28       | J/mol•K |                                                |

Lowest energy vibrational mode = 38 cm<sup>-1</sup>  
 Second lowest energy vibrational mode = 60 cm<sup>-1</sup>.

16 [Mo(AsC<sub>4</sub>H<sub>4</sub>)(CO)<sub>3</sub>(η<sup>5</sup>-C<sub>5</sub>H<sub>5</sub>)]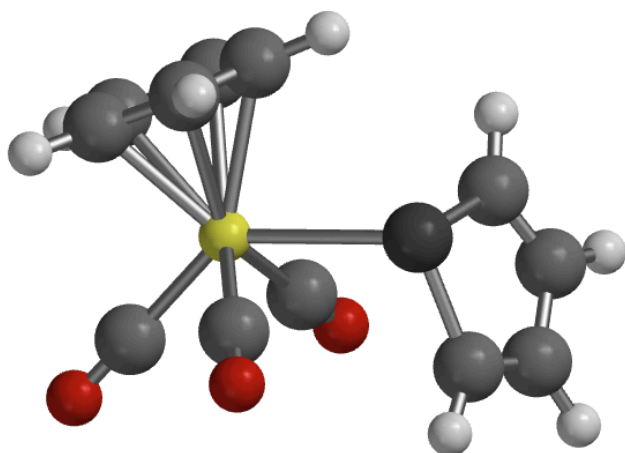

Figure S44. Optimised Geometry (ωB97X-D/6-31G\*/LANL2DZ(Sn)/Gas Phase)

| Atom | x         | y         | z         |
|------|-----------|-----------|-----------|
| Mo   | 0.936393  | -0.309970 | -0.422687 |
| As   | -1.214781 | -0.719838 | 1.215598  |
| C    | -2.473021 | 1.571954  | 1.953172  |
| C    | -0.798846 | 0.157575  | 2.876872  |
| O    | 0.354460  | 2.557208  | 0.759047  |
| C    | -2.393442 | 0.763854  | 0.874001  |
| C    | 0.544085  | 1.488240  | 0.381760  |
| C    | -0.149035 | 0.128167  | -2.499296 |
| H    | -0.678028 | 1.053287  | -2.682926 |
| C    | 0.312141  | -2.049795 | -1.895348 |
| H    | 0.185989  | -3.066254 | -1.548935 |
| O    | 1.891949  | -2.211699 | 1.889985  |
| C    | -0.714229 | -1.066835 | -1.981086 |
| H    | -1.752986 | -1.213601 | -1.717782 |
| C    | 1.539494  | -1.486797 | 1.065447  |
| O    | 3.859939  | 0.788637  | -0.024453 |
| C    | 1.517817  | -1.462227 | -2.364968 |
| H    | 2.473620  | -1.958225 | -2.461166 |
| C    | -1.583443 | 1.240205  | 3.061423  |
| C    | 2.788197  | 0.389413  | -0.156693 |
| C    | 1.229477  | -0.109658 | -2.735159 |
| H    | 1.931724  | 0.598178  | -3.154112 |
| H    | -3.002151 | 0.874247  | -0.017455 |
| H    | -3.148259 | 2.422366  | 2.015099  |
| H    | -1.567225 | 1.843967  | 3.965705  |
| H    | -0.089840 | -0.222399 | 3.603959  |



17 [Mo(AsC<sub>4</sub>Me<sub>4</sub>)(CO)<sub>3</sub>( $\eta^5$ -C<sub>5</sub>H<sub>5</sub>)]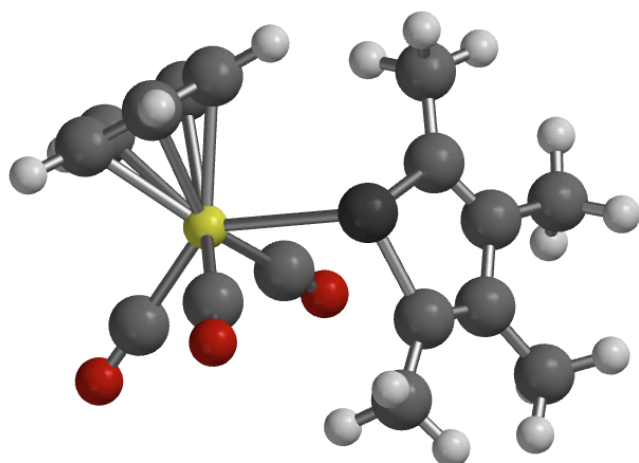Figure S45. Optimised Geometry ( $\omega$ B97X-D/6-31G\*/LANL2DZ(Sn)/Gas Phase)

## Thermodynamic Properties at 298.15 K

|                          |              |         |                                                |
|--------------------------|--------------|---------|------------------------------------------------|
| Zero Point Energy :      | 723.46       | kJ/mol  | (ZPE)                                          |
| Temperature Correction : | 55.53        | kJ/mol  | (vibration + gas law + rotation + translation) |
| Enthalpy Correction :    | 778.99       | kJ/mol  | (ZPE + temperature correction)                 |
| Enthalpy :               | -3148.289972 | au      | (Electronic Energy + Enthalpy Correction)      |
| Entropy :                | 591.53       | J/mol•K |                                                |
| Gibbs Energy :           | -3148.357146 | au      | (Enthalpy - T*Entropy)                         |
| C <sub>v</sub> :         | 376.07       | J/mol•K |                                                |

Lowest energy vibrational mode = 38 cm<sup>-1</sup>Second lowest energy vibrational mode = 45 cm<sup>-1</sup>.

## Cartesian Coordinates

| Atom | x         | y         | z         |
|------|-----------|-----------|-----------|
| Mo   | 1.579753  | -0.795416 | -1.222233 |
| As   | -0.555769 | -1.179455 | 0.467000  |
| C    | -1.861545 | 1.101063  | 1.153650  |
| C    | -0.124347 | -0.258050 | 2.111099  |
| C    | 0.938457  | -0.755616 | 3.046850  |
| H    | 0.842448  | -0.331166 | 4.050451  |
| H    | 1.938627  | -0.496351 | 2.675983  |
| H    | 0.908361  | -1.845433 | 3.146726  |
| O    | 0.961592  | 2.045956  | -0.004194 |
| C    | -1.785639 | 0.265131  | 0.091817  |
| C    | -0.924446 | 1.731400  | 3.466609  |
| H    | -0.640349 | 2.749830  | 3.175411  |
| H    | -0.222417 | 1.403534  | 4.235381  |
| H    | -1.917339 | 1.794596  | 3.927767  |
| C    | 1.162281  | 0.980519  | -0.390847 |
| C    | 0.510889  | -0.347429 | -3.308190 |
| H    | -0.016297 | 0.577220  | -3.499298 |
| C    | 0.968458  | -2.525721 | -2.710924 |
| H    | 0.840904  | -3.543715 | -2.369431 |
| O    | 2.544649  | -2.834754 | 0.958360  |
| C    | -0.058502 | -1.546103 | -2.802035 |
| H    | -1.098223 | -1.695943 | -2.545876 |
| C    | 2.180321  | -2.043492 | 0.201896  |
| C    | -2.601665 | 0.310409  | -1.167697 |
| H    | -1.994634 | 0.625962  | -2.026455 |
| H    | -3.444747 | 1.003904  | -1.098376 |
| H    | -3.017740 | -0.674771 | -1.409715 |
| O    | 4.490684  | 0.307004  | -0.775331 |
| C    | 2.178478  | -1.934774 | -3.167793 |
| H    | 3.136135  | -2.429132 | -3.256773 |
| C    | -0.930855 | 0.816096  | 2.270854  |
| C    | 3.420681  | -0.093617 | -0.923753 |
| C    | -2.792629 | 2.278986  | 1.265194  |
| H    | -3.429461 | 2.392222  | 0.385987  |
| H    | -2.226541 | 3.210590  | 1.383815  |
| H    | -3.447784 | 2.188837  | 2.139839  |
| C    | 1.891569  | -0.582003 | -3.534006 |
| H    | 2.596642  | 0.129681  | -3.941758 |



18 [Mo(AsC<sub>4</sub>Ph<sub>4</sub>)(CO)<sub>3</sub>( $\eta^5$ -C<sub>5</sub>H<sub>5</sub>)]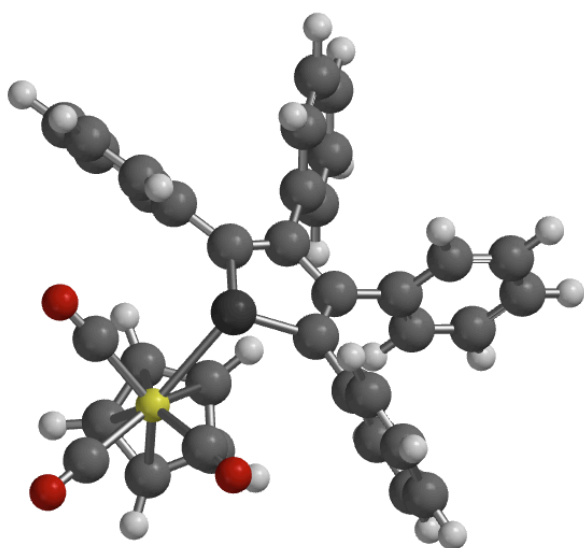Figure S46. Optimised Geometry ( $\omega$ B97X-D/6-31G\*/LANL2DZ(Sn)/Gas Phase)

## Thermodynamic Properties at 298.15 K

|                          |              |         |                                                |
|--------------------------|--------------|---------|------------------------------------------------|
| Zero Point Energy :      | 1254.94      | kJ/mol  | (ZPE)                                          |
| Temperature Correction : | 81.75        | kJ/mol  | (vibration + gas law + rotation + translation) |
| Enthalpy Correction :    | 1336.68      | kJ/mol  | (ZPE + temperature correction)                 |
| Enthalpy :               | -3914.778925 | au      | (Electronic Energy + Enthalpy Correction)      |
| Entropy :                | 759.12       | J/mol•K |                                                |
| Gibbs Energy :           | -3914.865130 | au      | (Enthalpy - T*Entropy)                         |
| C <sub>v</sub> :         | 611.46       | J/mol•K |                                                |

Lowest energy vibrational mode = 13 cm<sup>-1</sup>Second lowest energy vibrational mode = 23 cm<sup>-1</sup>.

## Cartesian Coordinates

| Atom | x         | y         | z         |
|------|-----------|-----------|-----------|
| Mo   | 2.119157  | -1.612060 | -2.191997 |
| As   | 0.019336  | -2.065547 | -0.497249 |
| C    | -1.200738 | 0.293206  | 0.139898  |
| C    | 0.530228  | -1.073326 | 1.077284  |
| O    | 3.210423  | -3.676791 | -0.065181 |
| C    | -1.165951 | -0.595380 | -0.894856 |
| C    | 2.769281  | -2.934896 | -0.824163 |
| C    | 3.213218  | 0.266030  | -1.238207 |
| H    | 3.715822  | 0.187993  | -0.283991 |
| C    | 1.575654  | 0.590838  | -2.831943 |
| H    | 0.622240  | 0.814417  | -3.290607 |
| O    | -0.065635 | -3.008232 | -3.989186 |
| C    | 1.855696  | 0.626724  | -1.436923 |
| H    | 1.150265  | 0.882405  | -0.659905 |
| C    | 0.703435  | -2.513231 | -3.291546 |
| O    | 3.841881  | -3.561680 | -3.968452 |
| C    | 2.765192  | 0.200031  | -3.502176 |
| H    | 2.891458  | 0.102217  | -4.571899 |
| C    | -0.248078 | 0.033651  | 1.228457  |
| C    | 3.203901  | -2.860965 | -3.315592 |
| C    | 3.779070  | -0.009531 | -2.511667 |
| H    | 4.805627  | -0.290433 | -2.703905 |
| C    | -1.971173 | -0.531084 | -2.127745 |
| C    | -3.444865 | -0.416686 | -4.518906 |
| C    | -2.088263 | 0.669091  | -2.845439 |
| C    | -2.611047 | -1.669079 | -2.632969 |
| C    | -3.340682 | -1.612576 | -3.815358 |
| C    | -2.816361 | 0.725140  | -4.027171 |
| H    | -1.612118 | 1.566136  | -2.459991 |
| H    | -2.538146 | -2.606931 | -2.089357 |
| H    | -3.826665 | -2.509082 | -4.188466 |
| H    | -2.894172 | 1.665363  | -4.565420 |
| H    | -4.012560 | -0.373527 | -5.443548 |
| C    | -2.180016 | 1.410844  | 0.222724  |
| C    | -4.059961 | 3.486817  | 0.338822  |
| C    | -3.549735 | 1.133043  | 0.228525  |
| C    | -1.766185 | 2.744826  | 0.276249  |
| C    | -2.698216 | 3.775498  | 0.332372  |
| C    | -4.483102 | 2.161721  | 0.286592  |
| H    | -3.878096 | 0.099086  | 0.178519  |
| H    | -0.705583 | 2.977427  | 0.266586  |
| H    | -2.359119 | 4.806582  | 0.370349  |
| H    | -5.543542 | 1.927370  | 0.289440  |
| H    | -4.787892 | 4.291422  | 0.384346  |
| C    | -0.224278 | 0.892605  | 2.447360  |
| C    | -0.214721 | 2.498401  | 4.742559  |
| C    | -1.068185 | 0.601997  | 3.520566  |
| C    | 0.622149  | 1.999880  | 2.538621  |
| C    | 0.629512  | 2.798287  | 3.677442  |
| C    | -1.063477 | 1.398074  | 4.661353  |
| H    | -1.729612 | -0.257005 | 3.455709  |
| H    | 1.278747  | 2.239535  | 1.705103  |
| H    | 1.294337  | 3.655435  | 3.732386  |
| H    | -1.723658 | 1.157342  | 5.489343  |

| Atom | x         | y         | z        |
|------|-----------|-----------|----------|
| H    | -0.211150 | 3.120198  | 5.632881 |
| C    | 1.540299  | -1.572590 | 2.028120 |
| C    | 3.498146  | -2.559780 | 3.783676 |
| C    | 1.452204  | -2.870546 | 2.545570 |
| C    | 2.630631  | -0.779420 | 2.406177 |
| C    | 3.599134  | -1.267320 | 3.276466 |
| C    | 2.420002  | -3.358913 | 3.415384 |
| H    | 0.611691  | -3.498186 | 2.262064 |
| H    | 2.711953  | 0.230480  | 2.016580 |
| H    | 4.435955  | -0.635003 | 3.558966 |
| H    | 2.331283  | -4.368565 | 3.805291 |
| H    | 4.255054  | -2.941746 | 4.462034 |

## Cartesian Coordinates

| Atom | x         | y         | z         |
|------|-----------|-----------|-----------|
| Mo   | 0.390524  | 1.023497  | -0.037267 |
| C    | -0.173038 | 2.722118  | -0.895542 |
| O    | -0.418329 | 3.719178  | -1.427077 |
| C    | 0.960521  | 0.590160  | -1.914523 |
| O    | 1.277039  | 0.337005  | -2.997754 |
| C    | -0.287345 | 1.186371  | 1.952748  |
| O    | -0.764864 | 1.227550  | 2.994378  |
| As   | -2.125846 | 0.740228  | -0.352349 |
| Sn   | 0.242250  | -1.850685 | -0.266198 |
| Cl   | -3.302838 | -0.844442 | 0.680284  |
| C    | -1.072479 | -2.678697 | -1.757356 |
| H    | -0.898282 | -2.212684 | -2.732316 |
| H    | -2.126999 | -2.573953 | -1.490408 |
| H    | -0.853803 | -3.747197 | -1.857887 |
| C    | 2.196385  | -2.552415 | -0.853368 |
| H    | 2.518050  | -2.080291 | -1.786745 |
| H    | 2.157197  | -3.634792 | -1.018101 |
| H    | 2.950976  | -2.354175 | -0.086642 |
| C    | -0.201594 | -2.695551 | 1.662880  |
| H    | -0.210392 | -3.789526 | 1.604079  |
| H    | -1.177127 | -2.356738 | 2.019205  |
| H    | 0.557796  | -2.392083 | 2.389777  |
| C    | -3.232111 | 2.222905  | 0.263896  |
| H    | -2.897117 | 3.137289  | -0.234563 |
| H    | -3.101767 | 2.334180  | 1.342769  |
| H    | -4.283094 | 2.032726  | 0.035900  |
| C    | -2.813592 | 0.499974  | -2.153025 |
| H    | -2.395012 | -0.410616 | -2.582633 |
| H    | -2.481115 | 1.360982  | -2.741689 |
| H    | -3.903864 | 0.448185  | -2.145576 |
| H    | 2.768686  | 2.714977  | -0.305984 |
| C    | 2.496622  | 2.014779  | 0.474293  |
| C    | 2.663620  | 0.601299  | 0.412479  |
| H    | 2.208183  | 3.361561  | 2.238716  |
| H    | 3.089311  | 0.044558  | -0.411958 |
| C    | 2.554590  | 0.107930  | 1.748757  |
| H    | 2.622962  | -0.936879 | 2.028845  |
| C    | 2.432992  | 1.197245  | 2.633866  |
| H    | 2.274997  | 1.130550  | 3.702370  |
| C    | 2.357907  | 2.355478  | 1.863720  |

19 [Mo(SnMe<sub>3</sub>)(CO)<sub>3</sub>(η<sup>5</sup>-C<sub>5</sub>H<sub>5</sub>)]/ClAsMe<sub>2</sub>-TS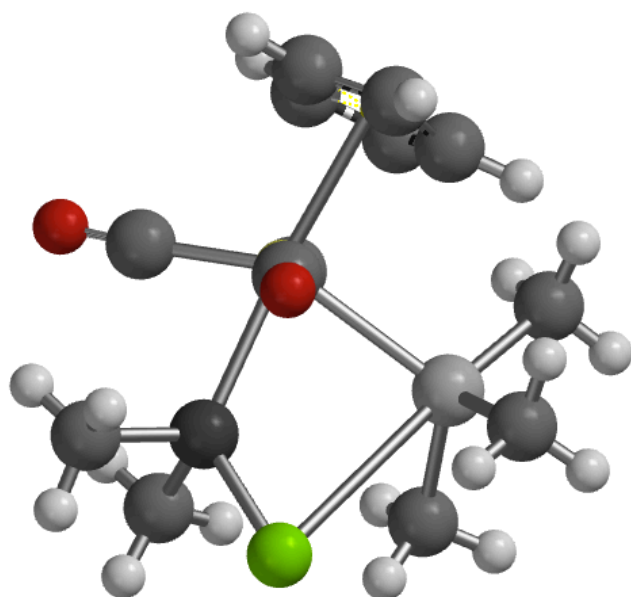Figure S47. Transition State Geometry ( $\omega$ B97X-D/6-31G\*/LANL2D $\zeta$ (Sn)/Gas Phase)

## Thermodynamic Properties at 298.15 K

|                          |              |         |                                                |
|--------------------------|--------------|---------|------------------------------------------------|
| Zero Point Energy :      | 739.65       | kJ/mol  | (ZPE)                                          |
| Temperature Correction : | 65.18        | kJ/mol  | (vibration + gas law + rotation + translation) |
| Enthalpy Correction :    | 804.83       | kJ/mol  | (ZPE + temperature correction)                 |
| Enthalpy :               | -3499.378387 | au      | (Electronic Energy + Enthalpy Correction)      |
| Entropy :                | 669.29       | J/mol•K |                                                |
| Gibbs Energy :           | -3499.454391 | au      | (Enthalpy - T*Entropy)                         |
| C <sub>v</sub> :         | 431.03       | J/mol•K |                                                |

Imaginary vibrational mode = -38 cm<sup>-1</sup>

20 [Mo(SnMe<sub>3</sub>)(CO)<sub>3</sub>(η<sup>5</sup>-C<sub>5</sub>H<sub>5</sub>)]/ClAsC<sub>4</sub>H<sub>4</sub>-TS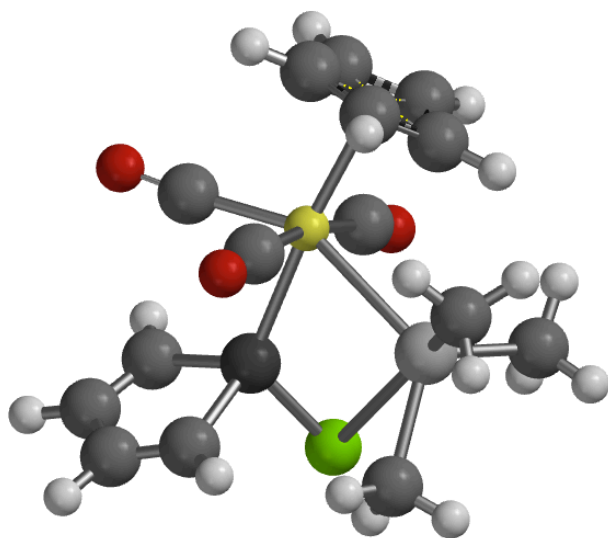Figure S48. Transition State Geometry ( $\omega$ B97X-D/6-31G\*/LANL2D $\zeta$ (Sn)/Gas Phase)

## Thermodynamic Properties at 298.15 K

|                          |              |         |                                                |
|--------------------------|--------------|---------|------------------------------------------------|
| Zero Point Energy :      | 714.83       | kJ/mol  | (ZPE)                                          |
| Temperature Correction : | 64.97        | kJ/mol  | (vibration + gas law + rotation + translation) |
| Enthalpy Correction :    | 779.81       | kJ/mol  | (ZPE + temperature correction)                 |
| Enthalpy :               | -3574.282808 | au      | (Electronic Energy + Enthalpy Correction)      |
| Entropy :                | 665.17       | J/mol•K |                                                |
| Gibbs Energy :           | -3574.358344 | au      | (Enthalpy - T*Entropy)                         |
| C <sub>v</sub> :         | 435.53       | J/mol•K |                                                |

Imaginary vibrational mode = -220 cm<sup>-1</sup>

## Cartesian Coordinates

| Atom | x         | y         | z         |
|------|-----------|-----------|-----------|
| Mo   | 0.431800  | 1.037260  | -0.225242 |
| C    | -0.491687 | 2.807530  | -0.243067 |
| O    | -0.938027 | 3.867383  | -0.163751 |
| C    | 0.747466  | 0.807440  | -2.289351 |
| O    | 0.810702  | 0.650746  | -3.423607 |
| C    | -0.104802 | 1.007964  | 1.737120  |
| O    | -0.486535 | 0.955676  | 2.824458  |
| As   | -1.845866 | 0.386145  | -0.928572 |
| Sn   | 0.430294  | -1.817086 | 0.345517  |
| Cl   | -2.151216 | -1.189836 | -2.484938 |
| C    | 1.450276  | -2.764743 | -1.298059 |
| H    | 2.399911  | -2.262802 | -1.507731 |
| H    | 0.833444  | -2.725398 | -2.200494 |
| H    | 1.656711  | -3.814968 | -1.063468 |
| C    | 1.544941  | -2.184959 | 2.162075  |
| H    | 1.089468  | -3.023595 | 2.699301  |
| H    | 1.542707  | -1.316861 | 2.827608  |
| H    | 2.584928  | -2.447087 | 1.940938  |
| C    | -1.393351 | -2.917708 | 0.696231  |
| H    | -1.110840 | -3.973662 | 0.781469  |
| H    | -2.126954 | -2.831850 | -0.108545 |
| H    | -1.857370 | -2.624087 | 1.643521  |
| C    | -3.257428 | -0.034445 | 0.319323  |
| H    | -3.183371 | -0.789115 | 1.090106  |
| C    | -3.014987 | 1.732711  | -1.681841 |
| H    | -2.755076 | 2.358324  | -2.526670 |
| H    | 2.571927  | 3.293863  | -1.188312 |
| C    | 2.614623  | 2.429185  | -0.537916 |
| C    | 3.068051  | 1.148645  | -0.886934 |
| H    | 2.160018  | 3.329274  | 1.485272  |
| H    | 3.308164  | 0.804041  | -1.883361 |
| C    | 2.953375  | 0.330059  | 0.255416  |
| H    | 3.278564  | -0.700232 | 0.323492  |
| C    | 2.691470  | 1.194903  | 1.391902  |
| H    | 2.599545  | 0.863441  | 2.417288  |
| C    | 2.454303  | 2.460414  | 0.910655  |
| C    | -4.143208 | 1.792582  | -0.967112 |
| H    | -4.941529 | 2.501552  | -1.168257 |
| C    | -4.268894 | 0.824689  | 0.145749  |
| H    | -5.151547 | 0.834607  | 0.779786  |

21  $[\text{Mo}(\text{AsMe}_2)(\text{CO})_2(\eta^5\text{-C}_5\text{H}_5)]$ 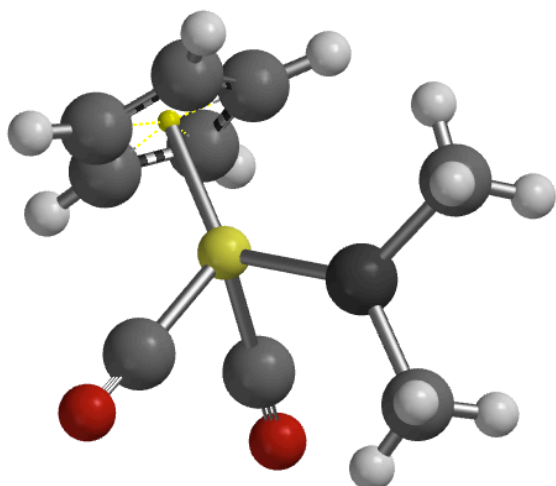Figure S49. Optimised Geometry ( $\omega\text{B97X-D/6-31G}^*/\text{LANL2DZ}(\text{Sn})/\text{Gas Phase}$ )

## Thermodynamic Properties at 298.15 K

|                          |              |         |                                                |
|--------------------------|--------------|---------|------------------------------------------------|
| Zero Point Energy :      | 441.47       | kJ/mol  | (ZPE)                                          |
| Temperature Correction : | 37.45        | kJ/mol  | (vibration + gas law + rotation + translation) |
| Enthalpy Correction :    | 478.92       | kJ/mol  | (ZPE + temperature correction)                 |
| Enthalpy :               | -2802.914242 | au      | (Electronic Energy + Enthalpy Correction)      |
| Entropy :                | 475.67       | J/mol•K |                                                |
| Gibbs Energy :           | -2802.968259 | au      | (Enthalpy - T*Entropy)                         |
| $C_v$ :                  | 242.77       | J/mol•K |                                                |

Lowest energy vibrational mode =  $31\text{ cm}^{-1}$ Second lowest energy vibrational mode =  $39\text{ cm}^{-1}$ .

## Cartesian Coordinates

| Atom | x         | y         | z         |
|------|-----------|-----------|-----------|
| Mo   | -0.266022 | -0.139570 | -0.746565 |
| H    | 0.255819  | -0.967182 | -3.631605 |
| C    | 0.808698  | -0.793092 | -2.719330 |
| C    | 1.122724  | -1.764909 | -1.725810 |
| H    | 1.348113  | 1.374265  | -2.857454 |
| H    | 0.839329  | -2.808334 | -1.743476 |
| C    | 1.918091  | -1.138087 | -0.727409 |
| H    | 2.326003  | -1.618035 | 0.152073  |
| C    | 2.085443  | 0.222464  | -1.089957 |
| H    | 2.641919  | 0.966652  | -0.536250 |
| C    | 1.392841  | 0.441308  | -2.312430 |
| C    | -1.572868 | 1.168002  | -1.430481 |
| O    | -2.330174 | 1.930402  | -1.861703 |
| C    | -1.857104 | -1.299964 | -0.769916 |
| O    | -2.780550 | -1.997719 | -0.810420 |
| As   | -0.620249 | 0.476030  | 1.476360  |
| C    | 0.677418  | 0.688812  | 2.928462  |
| H    | 0.644238  | 1.710720  | 3.317534  |
| H    | 1.677818  | 0.480137  | 2.543891  |
| H    | 0.449890  | -0.004430 | 3.743445  |
| C    | -2.273211 | 0.889297  | 2.431999  |
| H    | -3.106013 | 0.809946  | 1.730746  |
| H    | -2.233240 | 1.903596  | 2.839123  |
| H    | -2.420295 | 0.183284  | 3.254381  |

22  $[\text{Mo}(\text{AsMe}_2)(\text{CO})_2(\eta^5\text{-C}_5\text{H}_5)]$ 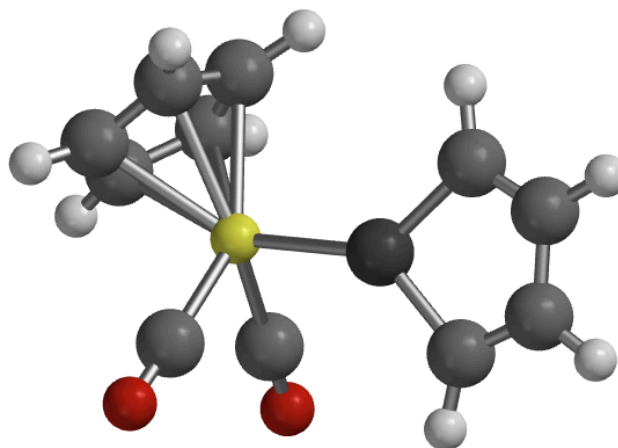Figure S50. Optimised Geometry ( $\omega\text{B97X-D/6-31G}^*/\text{LANL2DZ}(\text{Sn})/\text{Gas Phase}$ )

## Thermodynamic Properties at 298.15 K

|                          |              |         |                                                |
|--------------------------|--------------|---------|------------------------------------------------|
| Zero Point Energy :      | 420.21       | kJ/mol  | (ZPE)                                          |
| Temperature Correction : | 36.66        | kJ/mol  | (vibration + gas law + rotation + translation) |
| Enthalpy Correction :    | 456.87       | kJ/mol  | (ZPE + temperature correction)                 |
| Enthalpy :               | -2877.855673 | au      | (Electronic Energy + Enthalpy Correction)      |
| Entropy :                | 469.67       | J/mol•K |                                                |
| Gibbs Energy :           | -2877.909009 | au      | (Enthalpy - T*Entropy)                         |
| $C_v$ :                  | 243.72       | J/mol•K |                                                |

Lowest energy vibrational mode = 30 cm<sup>-1</sup>

Second lowest energy vibrational mode = 36 cm<sup>-1</sup>.

## Cartesian Coordinates

| Atom | x         | y         | z         |
|------|-----------|-----------|-----------|
| Mo   | -0.579156 | 0.914442  | -0.025200 |
| As   | 1.206221  | -0.587323 | 0.286935  |
| C    | 2.707180  | -2.814865 | 0.343927  |
| C    | 2.923266  | -0.564441 | 1.126203  |
| O    | -0.255446 | 2.151022  | 2.828544  |
| C    | 1.502756  | -2.434844 | -0.123225 |
| C    | -0.351824 | 1.684952  | 1.774830  |
| C    | -2.827326 | 0.372737  | 0.252758  |
| H    | -3.232125 | 0.141800  | 1.228416  |
| C    | -1.936388 | 0.135317  | -1.855574 |
| H    | -1.501763 | -0.293679 | -2.748430 |
| C    | -2.313841 | -0.572406 | -0.684479 |
| H    | -2.242423 | -1.641461 | -0.536549 |
| O    | 1.226450  | 3.365345  | -0.767516 |
| C    | -2.207593 | 1.513593  | -1.644241 |
| H    | -2.032206 | 2.308618  | -2.356437 |
| C    | 3.491690  | -1.781060 | 1.034554  |
| C    | 0.578774  | 2.450309  | -0.487831 |
| C    | -2.775687 | 1.665116  | -0.350286 |
| H    | -3.124945 | 2.588781  | 0.089289  |
| H    | 0.807247  | -3.073530 | -0.654118 |
| H    | 3.102365  | -3.820797 | 0.228936  |
| H    | 4.473103  | -2.012678 | 1.439649  |
| H    | 3.361672  | 0.305055  | 1.599848  |

23 [Mo{AsC<sub>4</sub>(SiMe<sub>3</sub>)<sub>2</sub>Me<sub>2</sub>}Me<sub>2</sub>](CO)<sub>2</sub>(η<sup>5</sup>-C<sub>5</sub>H<sub>5</sub>)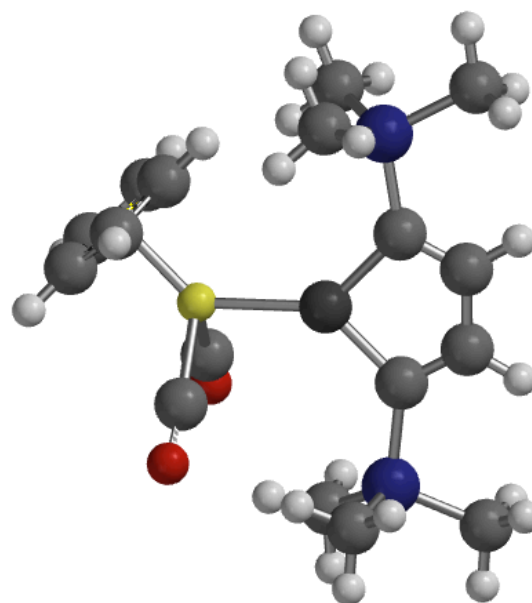

Figure S51. Optimised Geometry ( $\omega$ B97X-D/6-31G\*/LANL2DZ(Sn)/Gas Phase)

## Thermodynamic Properties at 298.15 K

|                          |              |         |                                                |
|--------------------------|--------------|---------|------------------------------------------------|
| Zero Point Energy :      | 934.43       | kJ/mol  | (ZPE)                                          |
| Temperature Correction : | 69.29        | kJ/mol  | (vibration + gas law + rotation + translation) |
| Enthalpy Correction :    | 1003.71      | kJ/mol  | (ZPE + temperature correction)                 |
| Enthalpy :               | -3694.919842 | au      | (Electronic Energy + Enthalpy Correction)      |
| Entropy :                | 686.12       | J/mol•K |                                                |
| Gibbs Energy :           | -3694.997757 | au      | (Enthalpy - T*Entropy)                         |
| $C_v$ :                  | 482.21       | J/mol•K |                                                |

Lowest energy vibrational mode = 20 cm<sup>-1</sup>

Second lowest energy vibrational mode = 34 cm<sup>-1</sup>.

## Cartesian Coordinates

---

| Atom | x         | y         | z         |
|------|-----------|-----------|-----------|
| Mo   | -2.149672 | 0.211180  | -0.211425 |
| C    | -2.482677 | 1.204683  | 1.465968  |
| O    | -2.731607 | 1.752951  | 2.451965  |
| C    | -2.063489 | 2.024163  | -0.953952 |
| O    | -2.079529 | 3.089951  | -1.410017 |
| H    | -5.032149 | -0.426306 | 0.699023  |
| C    | -4.320312 | -0.773550 | -0.037779 |
| C    | -3.365367 | -1.811800 | 0.149437  |
| H    | -4.769270 | 0.518408  | -1.796712 |
| H    | -3.237793 | -2.399521 | 1.048658  |
| C    | -2.623276 | -1.946026 | -1.055017 |
| H    | -1.859642 | -2.684556 | -1.250102 |
| C    | -3.128495 | -0.990033 | -1.988056 |
| H    | -2.791207 | -0.853437 | -3.006608 |
| C    | -4.181965 | -0.274390 | -1.353986 |
| As   | 0.176151  | 0.128050  | 0.154081  |
| C    | 1.525493  | 1.406771  | 0.675811  |
| C    | 1.499499  | -1.279072 | 0.167208  |
| C    | 2.669338  | -0.720791 | 0.554328  |
| H    | 3.588349  | -1.294900 | 0.662253  |
| C    | 2.683230  | 0.720533  | 0.822018  |
| H    | 3.616364  | 1.199080  | 1.113882  |
| Si   | 1.234061  | -3.069771 | -0.290868 |
| Si   | 1.392712  | 3.275908  | 0.819106  |
| C    | 1.340977  | 4.009818  | -0.913960 |
| H    | 0.451461  | 3.678799  | -1.459445 |
| H    | 2.224860  | 3.716929  | -1.491323 |
| H    | 1.313745  | 5.104919  | -0.868857 |
| C    | -0.132429 | 3.797997  | 1.785123  |
| H    | -1.045993 | 3.656063  | 1.200608  |
| H    | -0.066944 | 4.862806  | 2.038037  |
| H    | -0.240103 | 3.237509  | 2.719228  |
| C    | 2.939536  | 3.887694  | 1.710163  |
| H    | 2.896037  | 4.976086  | 1.832462  |
| H    | 3.852197  | 3.657087  | 1.149197  |
| H    | 3.032444  | 3.443306  | 2.707272  |
| C    | 0.749955  | -3.153784 | -2.114030 |
| H    | 0.327524  | -4.128864 | -2.383022 |
| H    | 1.634597  | -2.990158 | -2.739575 |
| H    | 0.022779  | -2.378886 | -2.379922 |
| C    | -0.098722 | -3.807216 | 0.822306  |
| H    | -0.449127 | -4.777097 | 0.450944  |
| H    | -0.960806 | -3.139339 | 0.911834  |
| H    | 0.300860  | -3.957362 | 1.831517  |
| C    | 2.841598  | -4.019627 | -0.040332 |
| H    | 2.708332  | -5.074137 | -0.308170 |
| H    | 3.173483  | -3.981854 | 1.003086  |
| H    | 3.645760  | -3.618360 | -0.667085 |

---
